# Supplementary material
Source: PubMed Central journal article supplement (PMC2970576)
Supplement: supp_djq361_jnci-JNCI-09-1342-s01.pdf [file supp_djq361_jnci-JNCI-09-1342-s01.pdf]

MCF-7

MCF-7/ADR

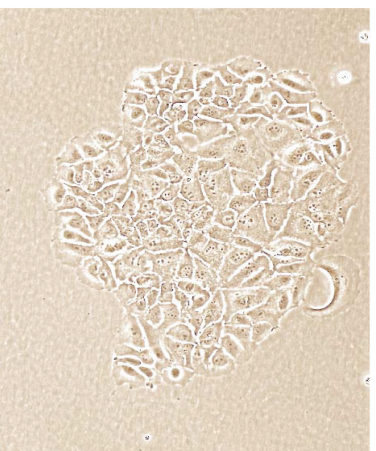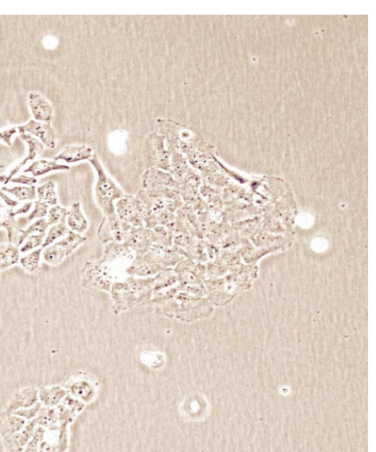

Low confluence

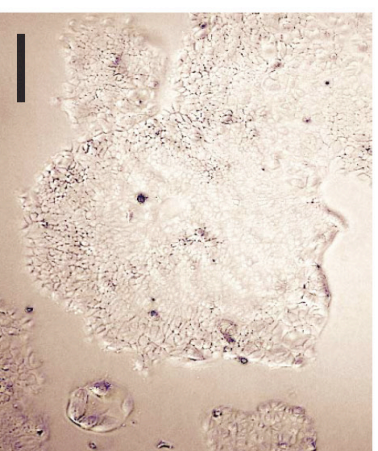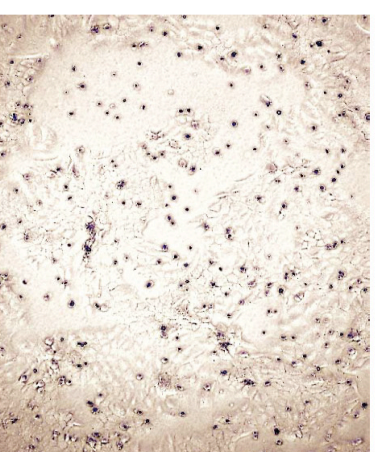

High confluence

**Supplementary Figure 4.** Morphology of MCF-7 and MCF-7/ADR cells grown at low and high cell density. Cells were photographed at 20x magnification with an inverted phase-contrast microscope (Olympus CKX31 microscope, Germany). MCF-7 cells at low confluence have a cobblestone appearance. **Left** MCF-7 cells. **Right** MCF-7/ADR cells. **Upper** Cells at low confluence. Cells were photographed 3 days after plating. **Lower** Cells at higher confluence 7 days after plating. For upper panels, 2 x 10<sup>5</sup> cells were plated, and for lower panels, 1 x 10<sup>6</sup> cells were plated. Scale bar = 20  $\mu$ m.
