# Supplementary material
Source: PubMed Central journal article supplement (PMC2970576)
Supplement: supp_djq361_jnci-JNCI-09-1342-s02.pdf [file supp_djq361_jnci-JNCI-09-1342-s02.pdf]

Calcagno et al.  
Supplementary Figure 1

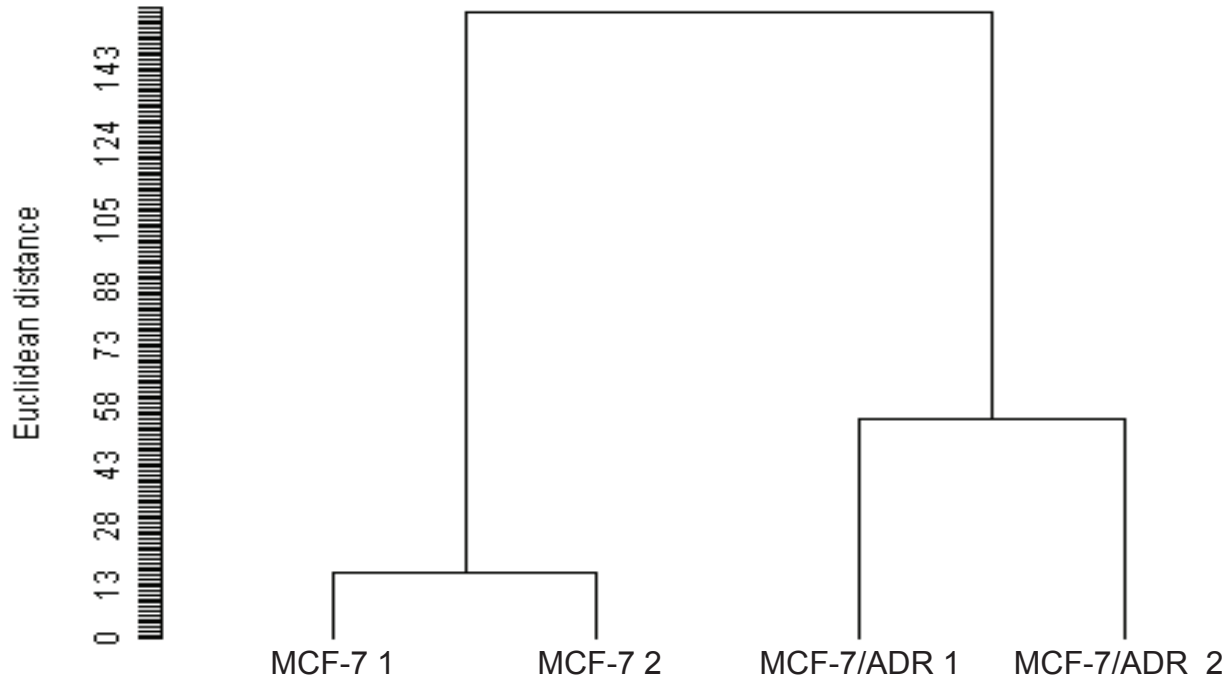

**Supplementary Figure 1.** Dendrogram from clustering experiments. Hierarchical clustering analysis used the Euclidean distance and a complete linkage algorithm. Hierarchical clustering of the 4976 genes remaining after filtering by exclusion parameters was used to determine the similarities of replicate gene expression profiles from MCF-7 and MCF-7/ADR cells. MCF-7 1= replicate 1 of MCF-7; MCF-7 2= replicate 2 of MCF-7; MCF-7/ADR 1= replicate 1 of MCF-7/ADR; MCF-7/ADR 2= replicate 2 of MCF-7/ADR.
