# Supplementary material
Source: PubMed Central journal article supplement (PMC2970576)
Supplement: supp_djq361_jnci-JNCI-09-1342-s03.pdf [file supp_djq361_jnci-JNCI-09-1342-s03.pdf]

Calcagno et al.  
Supplementary Figure 2

A

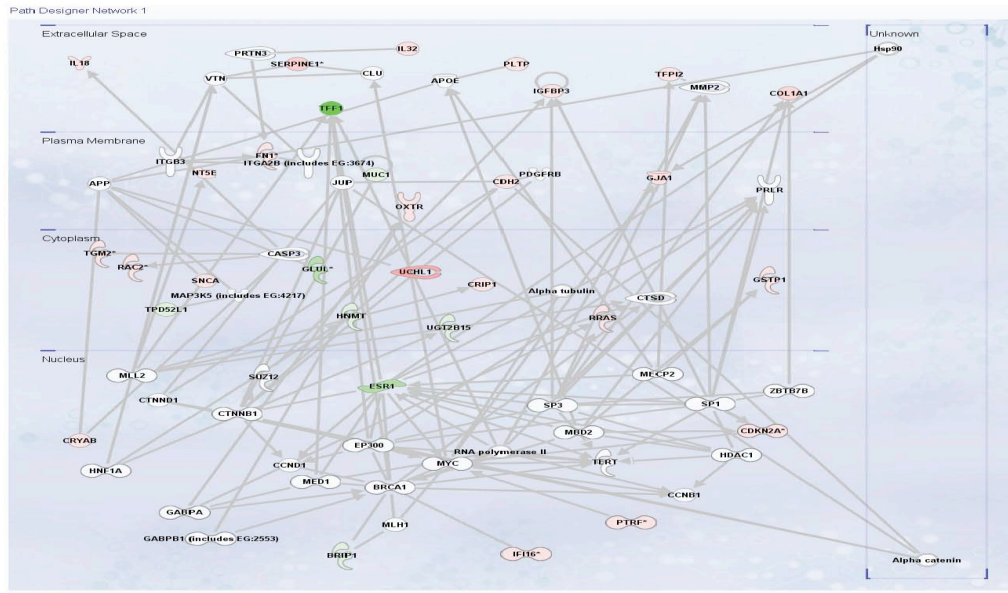

B

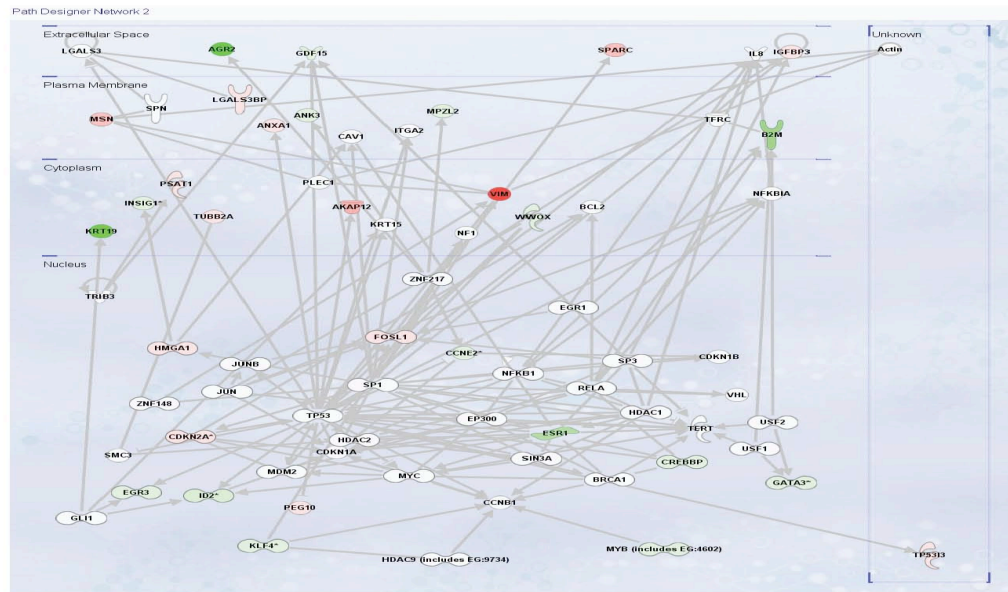

C

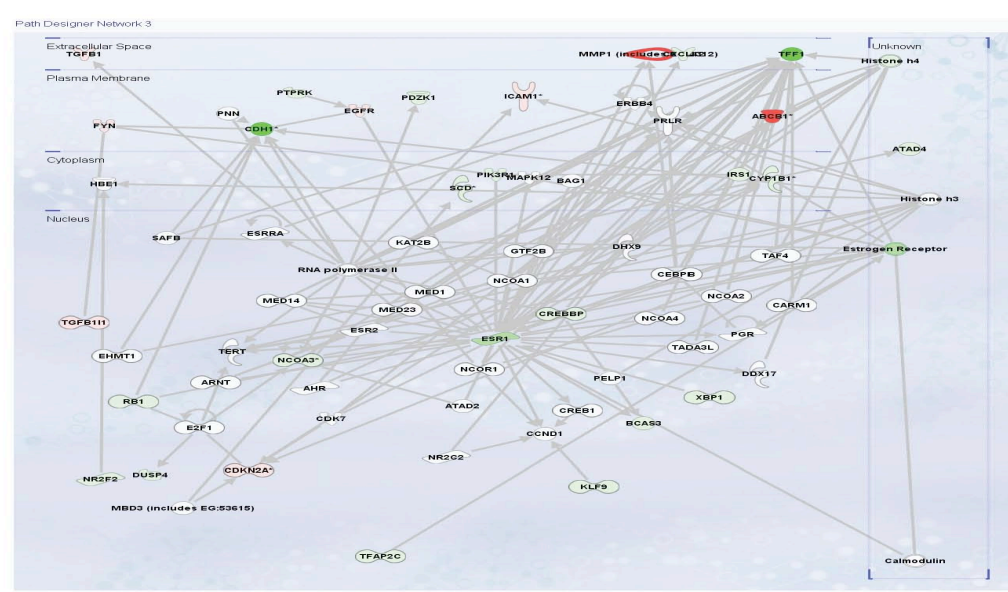

**Supplementary Figure 2.** Ingenuity Pathway analysis of genes with statistically significant differences in expression between MCF-7 and MCF-7/ADR cells. Genes with a greater than plus or minus 10-fold change in expression between MCF-7/ADR cells and MCF-7 cells (Supplementary Tables 1 and 2, available online) were evaluated by use of Ingenuity Pathway analysis software for biological relationships. **A)** Highest ranked pathway. **B)** Second highest ranked pathway. **C)** Third highest ranked pathway. Green shapes = decreased gene expression; red shapes = increased gene expression on MCF-7/ADR cells compared with parental MCF-7 cells.
