# Supplementary material
Source: PubMed Central journal article supplement (PMC2970576)
Supplement: supp_djq361_jnci-JNCI-09-1342-s04.pdf [file supp_djq361_jnci-JNCI-09-1342-s04.pdf]

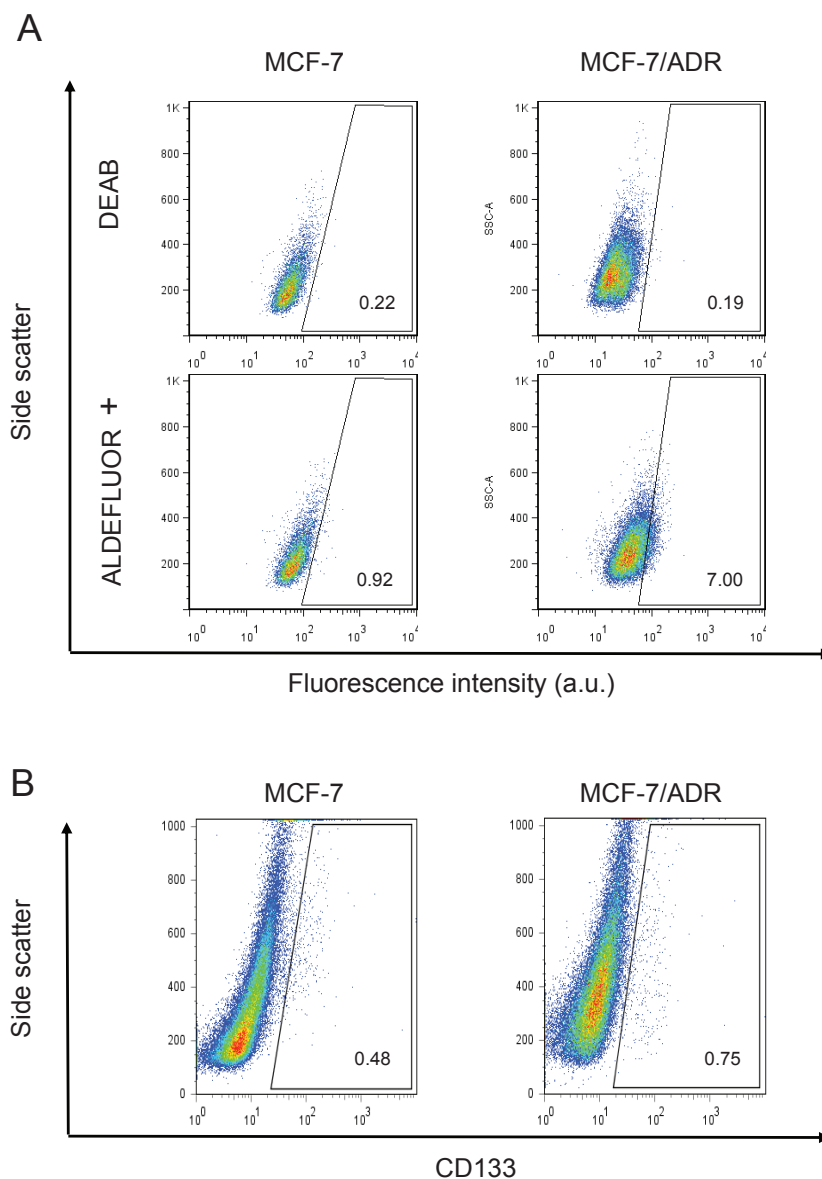

**Supplementary Figure 3.** Analysis of MCF-7/ADR cells and parental MCF-7 cells for the expression of aldehyde dehydrogenase (ALDH) and CD133. **A)** ALDH activity. The ALDEFLUOR kit (StemCell Technologies, Inc., Vancouver, BC, Canada) was used; the fluorescence of cells treated with the ALDEFLUOR substrate increases in the presence of ALDH as detected by flow cytometry with FL1 detector. Diethylaminobenzaldehyde (DEAB) is an ALDH inhibitor. Values in the lower right corners of each panel represent the percent of ALDH-positive cells. Data are from a representative experiment of two independent experiments. a.u. = arbitrary units. **B)** CD133 expression. Briefly, cells were incubated with fluorescein isothiocyanate-conjugated antibody against CD133 and analyzed by flow cytometry with an LSR II. Data from no fewer than 30,000 cells were analyzed with FACSDiVa software. Side scatter is reflected and refracted light intensity related to cell granularity and complexity. Values in the lower right indicate the percentage of CD133-positive cells. Histograms from a representative experiment of four experiments are shown.
