# Supplementary material
Source: PubMed Central journal article supplement (PMC2970576)
Supplement: supp_djq361_jnci-JNCI-09-1342-s05.pdf [file supp_djq361_jnci-JNCI-09-1342-s05.pdf]

**Supplementary Table 1.** Statistically significant genes showing a greater than tenfold increase in expression in MCF-7/ADR cells\*

| Probe set   | Gene symbol   | Parametric $P \uparrow$ | FDR                   | Fold change | Description                                                       |
|-------------|---------------|-------------------------|-----------------------|-------------|-------------------------------------------------------------------|
| 204475_at   | <i>MMP1</i>   | $< 1 \times 10^{-7}$    | $< 1 \times 10^{-7}$  | 202.4       | Matrix metalloproteinase 1 (interstitial collagenase)             |
| 201426_s_at | <i>VIM</i>    | $3.00 \times 10^{-7}$   | $3.18 \times 10^{-5}$ | 198.3       | Vimentin                                                          |
| 209993_at   | <i>ABCB1</i>  | $< 1 \times 10^{-7}$    | $< 1 \times 10^{-7}$  | 191.7       | ATP-binding cassette, sub-family B (MDR/TAP), member 1            |
| 213564_x_at | <i>LDHB</i>   | $< 1 \times 10^{-7}$    | $< 1 \times 10^{-7}$  | 189.1       | Lactate dehydrogenase B                                           |
| 209994_s_at | <i>ABCB1</i>  | $1.00 \times 10^{-7}$   | $2.16 \times 10^{-5}$ | 152.2       | ATP-binding cassette, sub-family B (MDR/TAP), member 1            |
| 202237_at   | <i>NNMT</i>   | $1.00 \times 10^{-7}$   | $2.16 \times 10^{-5}$ | 129.7       | Nicotinamide <i>N</i> -methyltransferase                          |
| 208782_at   | <i>FSTL1</i>  | $2.00 \times 10^{-7}$   | $2.69 \times 10^{-5}$ | 115.1       | Follistatin-like 1                                                |
| 209101_at   | <i>CTGF</i>   | $1.00 \times 10^{-7}$   | $2.16 \times 10^{-5}$ | 110.2       | Connective tissue growth factor                                   |
| 200736_s_at | <i>GPX1</i>   | $1.00 \times 10^{-7}$   | $2.16 \times 10^{-5}$ | 103.1       | Glutathione peroxidase 1                                          |
| 201030_x_at | <i>LDHB</i>   | $1.00 \times 10^{-7}$   | $2.16 \times 10^{-5}$ | 102.4       | Lactate dehydrogenase B                                           |
| 201387_s_at | <i>UCHL1</i>  | $2.00 \times 10^{-7}$   | $2.69 \times 10^{-5}$ | 94.2        | Ubiquitin carboxyl-terminal esterase L1 (ubiquitin thiolesterase) |
| 210517_s_at | <i>AKAP12</i> | $2.00 \times 10^{-7}$   | $2.69 \times 10^{-5}$ | 86.7        | A kinase (PRKA) anchor protein 12                                 |
| 201215_at   | <i>PLS3</i>   | $4.00 \times 10^{-7}$   | $3.49 \times 10^{-5}$ | 86.5        | Plastin 3 (T isoform)                                             |
| 210764_s_at | <i>CYR61</i>  | $2.00 \times 10^{-7}$   | $2.69 \times 10^{-5}$ | 82.9        | Cysteine-rich, angiogenic inducer, 61                             |
| 201445_at   | <i>CNN3</i>   | $1.00 \times 10^{-7}$   | $2.16 \times 10^{-5}$ | 79.6        | Calponin 3, acidic                                                |
| 214247_s_at | <i>DKK3</i>   | $3.00 \times 10^{-7}$   | $3.18 \times 10^{-5}$ | 79.5        | Dickkopf homolog 3 ( <i>Xenopus laevis</i> )                      |
| 212077_at   | <i>CALD1</i>  | $5.00 \times 10^{-7}$   | $3.66 \times 10^{-5}$ | 73.6        | Caldesmon 1                                                       |
| 200665_s_at | <i>SPARC</i>  | $5.00 \times 10^{-7}$   | $3.66 \times 10^{-5}$ | 71.3        | Secreted protein, acidic, cysteine-rich (osteonectin)             |
| 200600_at   | <i>MSN</i>    | $1.10 \times 10^{-6}$   | $4.68 \times 10^{-5}$ | 68.3        | Moesin                                                            |
| 206042_x_at | <i>SNURF</i>  | $1.00 \times 10^{-7}$   | $2.16 \times 10^{-5}$ | 66.8        | SNRPN upstream reading frame                                      |
| 33767_at    | <i>NEFH</i>   | $2.00 \times 10^{-7}$   | $2.69 \times 10^{-5}$ | 64.2        | Neurofilament, heavy polypeptide                                  |
| 201289_at   | <i>CYR61</i>  | $1.00 \times 10^{-7}$   | $2.16 \times 10^{-5}$ | 59.7        | Cysteine-rich, angiogenic inducer, 61                             |
| 201522_x_at | <i>SNRPN</i>  | $4.00 \times 10^{-7}$   | $3.49 \times 10^{-5}$ | 58.7        | Small nuclear ribonucleoprotein polypeptide N                     |
| 201272_at   | <i>AKR1B1</i> | $1.20 \times 10^{-6}$   | $4.82 \times 10^{-5}$ | 55.5        | Aldo-keto reductase family 1, member B1 (aldose reductase)        |
| 218332_at   | <i>BEX1</i>   | $5.00 \times 10^{-7}$   | $3.66 \times 10^{-5}$ | 55.4        | Brain expressed, X-linked 1                                       |

|             |                    |                       |                       |      |                                                                                               |
|-------------|--------------------|-----------------------|-----------------------|------|-----------------------------------------------------------------------------------------------|
| 204083_s_at | <i>TPM2</i>        | $2.00 \times 10^{-7}$ | $2.69 \times 10^{-5}$ | 53.7 | Tropomyosin 2 ( $\beta$ )                                                                     |
| 202686_s_at | <i>AXL</i>         | $8.00 \times 10^{-7}$ | $4.28 \times 10^{-5}$ | 53.1 | AXL receptor tyrosine kinase                                                                  |
| 202627_s_at | <i>SERPINE1</i>    | $5.00 \times 10^{-7}$ | $3.66 \times 10^{-5}$ | 51.7 | Serpin peptidase inhibitor, clade E (nexin, plasminogen activator inhibitor type 1), member 1 |
| 220051_at   | <i>PRSS21</i>      | $3.00 \times 10^{-7}$ | $3.18 \times 10^{-5}$ | 49.5 | Protease, serine, 21 (testisin)                                                               |
| 218847_at   | <i>IGF2BP2</i>     | $1.00 \times 10^{-6}$ | $4.61 \times 10^{-5}$ | 49.3 | Insulin-like growth factor 2 mRNA binding protein 2                                           |
| 201324_at   | <i>EMP1</i>        | $9.00 \times 10^{-7}$ | $4.39 \times 10^{-5}$ | 46.5 | Epithelial membrane protein 1                                                                 |
| 206018_at   | <i>FOXP1</i>       | $8.00 \times 10^{-7}$ | $4.28 \times 10^{-5}$ | 43.7 | Forkhead box G1                                                                               |
| 210869_s_at | <i>MCAM</i>        | $2.70 \times 10^{-6}$ | $6.82 \times 10^{-5}$ | 43.6 | Melanoma cell adhesion molecule                                                               |
| 202310_s_at | <i>COL1A1</i>      | $3.00 \times 10^{-7}$ | $3.18 \times 10^{-5}$ | 43.4 | Collagen, type I, $\alpha$ 1                                                                  |
| 219014_at   | <i>PLAC8</i>       | $4.00 \times 10^{-7}$ | $3.49 \times 10^{-5}$ | 42.1 | Placenta-specific 8                                                                           |
| 218718_at   | <i>PDGFC</i>       | $4.00 \times 10^{-7}$ | $3.49 \times 10^{-5}$ | 39.3 | Platelet-derived growth factor C                                                              |
| 211964_at   | <i>COL4A2</i>      | $8.00 \times 10^{-7}$ | $4.28 \times 10^{-5}$ | 36.4 | Collagen, type IV, $\alpha$ 2                                                                 |
| 201667_at   | <i>GJA1</i>        | $6.00 \times 10^{-6}$ | $1.06 \times 10^{-4}$ | 35.0 | Gap junction protein, $\alpha$ 1, 43kda                                                       |
| 204955_at   | <i>SRPX</i>        | $4.00 \times 10^{-7}$ | $3.49 \times 10^{-5}$ | 34.3 | Sushi-repeat-containing protein, X-linked                                                     |
| 201058_s_at | <i>MYL9</i>        | $1.10 \times 10^{-6}$ | $4.68 \times 10^{-5}$ | 33.8 | Myosin, light chain 9, regulatory                                                             |
| 202052_s_at | <i>RAI14</i>       | $6.00 \times 10^{-7}$ | $4.03 \times 10^{-5}$ | 33.7 | Retinoic acid induced 14                                                                      |
| 218084_x_at | <i>FXVD5</i>       | $7.00 \times 10^{-7}$ | $4.25 \times 10^{-5}$ | 33.3 | FXVD domain containing ion transport regulator 5                                              |
| 202238_s_at | <i>NNMT</i>        | $1.80 \times 10^{-6}$ | $5.85 \times 10^{-5}$ | 32.8 | Nicotinamide N-methyltransferase                                                              |
| 217975_at   | <i>WBP5</i>        | $1.73 \times 10^{-5}$ | $1.89 \times 10^{-4}$ | 32.7 | WW domain binding protein 5                                                                   |
| 203828_s_at | <i>IL32</i>        | $1.20 \times 10^{-6}$ | $4.82 \times 10^{-5}$ | 32.3 | Interleukin 32                                                                                |
| 201505_at   | <i>LAMB1</i>       | $2.30 \times 10^{-6}$ | $6.36 \times 10^{-5}$ | 32.2 | Laminin, $\beta$ 1                                                                            |
| 212190_at   | <i>SERPINE2</i>    | $3.40 \times 10^{-6}$ | $7.62 \times 10^{-5}$ | 32.1 | Serpin peptidase inhibitor, clade E (nexin, plasminogen activator inhibitor type 1), member 2 |
| 202760_s_at | <i>PALM2-AKAP2</i> | $8.20 \times 10^{-6}$ | $1.24 \times 10^{-4}$ | 31.8 | PALM2-AKAP2 readthrough transcript                                                            |
| 209550_at   | <i>NDN</i>         | $9.00 \times 10^{-7}$ | $4.39 \times 10^{-5}$ | 31.3 | Necdin homolog (mouse)                                                                        |
| 209644_x_at | <i>CDKN2A</i>      | $6.00 \times 10^{-7}$ | $4.03 \times 10^{-5}$ | 31.0 | Cyclin-dependent kinase inhibitor 2A (melanoma, p16, inhibits CDK4)                           |
| 211340_s_at | <i>MCAM</i>        | $7.00 \times 10^{-7}$ | $4.25 \times 10^{-5}$ | 30.9 | Melanoma cell adhesion molecule                                                               |
| 201063_at   | <i>RCN1</i>        | $4.00 \times 10^{-7}$ | $3.49 \times 10^{-5}$ | 30.9 | Reticulocalbin 1, EF-hand calcium binding domain                                              |

|             |                 |                       |                       |      |                                                                                               |
|-------------|-----------------|-----------------------|-----------------------|------|-----------------------------------------------------------------------------------------------|
| 207039_at   | <i>CDKN2A</i>   | $1.50 \times 10^{-6}$ | $5.45 \times 10^{-5}$ | 30.8 | Cyclin-dependent kinase inhibitor 2A (melanoma, p16, inhibits CDK4)                           |
| 220057_at   | <i>XAGE1D</i>   | $1.70 \times 10^{-6}$ | $5.75 \times 10^{-5}$ | 30.7 | X antigen family, member 1D                                                                   |
| 200824_at   | <i>GSTP1</i>    | $6.00 \times 10^{-7}$ | $4.03 \times 10^{-5}$ | 29.6 | Glutathione S-transferase $\pi$ 1                                                             |
| 213603_s_at | <i>RAC2</i>     | $6.00 \times 10^{-7}$ | $4.03 \times 10^{-5}$ | 29.6 | Ras-related C3 botulinum toxin substrate 2 ( $\rho$ family, small GTP binding protein Rac2)   |
| 202759_s_at | <i>AKAP2</i>    | $7.50 \times 10^{-6}$ | $1.17 \times 10^{-4}$ | 29.1 | A kinase (PRKA) anchor protein 2                                                              |
| 219874_at   | <i>SLC12A8</i>  | $2.50 \times 10^{-6}$ | $6.48 \times 10^{-5}$ | 29.0 | Solute carrier family 12 (potassium/chloride transporters), member 8                          |
| 209386_at   | <i>TM4SF1</i>   | $7.00 \times 10^{-7}$ | $4.25 \times 10^{-5}$ | 29.0 | Transmembrane 4 L six family member 1                                                         |
| 209016_s_at | <i>KRT7</i>     | $4.00 \times 10^{-7}$ | $3.49 \times 10^{-5}$ | 28.5 | Keratin 7                                                                                     |
| 203184_at   | <i>FBN2</i>     | $1.40 \times 10^{-5}$ | $1.70 \times 10^{-4}$ | 28.5 | Fibrillin 2                                                                                   |
| 204086_at   | <i>PRAME</i>    | $8.00 \times 10^{-7}$ | $4.28 \times 10^{-5}$ | 28.2 | Preferentially expressed antigen in melanoma                                                  |
| 205081_at   | <i>CRIP1</i>    | $4.00 \times 10^{-7}$ | $3.49 \times 10^{-5}$ | 28.0 | Cysteine-rich protein 1 (intestinal)                                                          |
| 209278_s_at | <i>TFPI2</i>    | $1.40 \times 10^{-6}$ | $5.16 \times 10^{-5}$ | 27.9 | Tissue factor pathway inhibitor 2                                                             |
| 208789_at   | <i>PTRF</i>     | $8.00 \times 10^{-7}$ | $4.28 \times 10^{-5}$ | 27.8 | Polymerase I and transcript release factor                                                    |
| 214720_x_at | <i>10-Sep</i>   | $1.60 \times 10^{-6}$ | $5.65 \times 10^{-5}$ | 27.4 | Septin 10                                                                                     |
| 203819_s_at | <i>IGF2BP3</i>  | $8.90 \times 10^{-6}$ | $1.28 \times 10^{-4}$ | 26.9 | Insulin-like growth factor 2 mRNA binding protein 3                                           |
| 212414_s_at | <i>6-Sep</i>    | $1.00 \times 10^{-6}$ | $4.61 \times 10^{-5}$ | 26.8 | Septin 6                                                                                      |
| 210095_s_at | <i>IGFBP3</i>   | $5.00 \times 10^{-7}$ | $3.66 \times 10^{-5}$ | 26.2 | Insulin-like growth factor binding protein 3                                                  |
| 201042_at   | <i>TGM2</i>     | $4.40 \times 10^{-6}$ | $8.49 \times 10^{-5}$ | 25.8 | Transglutaminase 2 (C polypeptide, protein-glutamine- $\gamma$ -glutamyltransferase)          |
| 202628_s_at | <i>SERPINE1</i> | $2.00 \times 10^{-6}$ | $6.07 \times 10^{-5}$ | 25.6 | Serpin peptidase inhibitor, clade E (nexin, plasminogen activator inhibitor type 1), member 1 |
| 203917_at   | <i>CXADR</i>    | $5.20 \times 10^{-6}$ | $9.58 \times 10^{-5}$ | 24.8 | Coxsackie virus and adenovirus receptor                                                       |
| 209651_at   | <i>TGFB11</i>   | $1.01 \times 10^{-5}$ | $1.41 \times 10^{-4}$ | 24.2 | Transforming growth factor $\beta$ 1 induced transcript 1                                     |
| 205627_at   | <i>CDA</i>      | $8.00 \times 10^{-7}$ | $4.28 \times 10^{-5}$ | 24.0 | Cytidine deaminase                                                                            |
| 205798_at   | <i>IL7R</i>     | $3.50 \times 10^{-6}$ | $7.64 \times 10^{-5}$ | 23.6 | Interleukin 7 receptor                                                                        |
| 209318_x_at | <i>PLAGL1</i>   | $2.80 \times 10^{-6}$ | $6.97 \times 10^{-5}$ | 23.1 | Pleiomorphic adenoma gene-like 1                                                              |
| 213069_at   | <i>HEG1</i>     | $9.30 \times 10^{-6}$ | $1.32 \times 10^{-4}$ | 22.9 | HEG homolog 1 (zebrafish)                                                                     |
| 201995_at   | <i>EXT1</i>     | $6.00 \times 10^{-7}$ | $4.03 \times 10^{-5}$ | 22.7 | Exostoses (multiple) 1                                                                        |
| 202998_s_at | <i>LOXL2</i>    | $1.10 \times 10^{-6}$ | $4.68 \times 10^{-5}$ | 22.5 | Lysyl oxidase-like 2                                                                          |

|             |                |                       |                       |      |                                                                                            |
|-------------|----------------|-----------------------|-----------------------|------|--------------------------------------------------------------------------------------------|
| 210105_s_at | <i>FYN</i>     | $9.40 \times 10^{-6}$ | $1.33 \times 10^{-4}$ | 22.1 | FYN oncogene related to SRC, FGR, YES                                                      |
| 201506_at   | <i>TGFBI</i>   | $6.00 \times 10^{-7}$ | $4.03 \times 10^{-5}$ | 21.8 | Transforming growth factor, $\beta$ -induced, 68kda                                        |
| 213428_s_at | <i>COL6A1</i>  | $2.20 \times 10^{-6}$ | $6.26 \times 10^{-5}$ | 21.5 | Collagen, type VI, $\alpha 1$                                                              |
| 202855_s_at | <i>SLC16A3</i> | $2.00 \times 10^{-6}$ | $6.07 \times 10^{-5}$ | 21.3 | Solute carrier family 16, member 3 (monocarboxylic acid transporter 4)                     |
| 218717_s_at | <i>LEPREL1</i> | $1.30 \times 10^{-6}$ | $5.01 \times 10^{-5}$ | 21.3 | Leprecan-like 1                                                                            |
| 203729_at   | <i>EMP3</i>    | $3.90 \times 10^{-6}$ | $7.86 \times 10^{-5}$ | 21.2 | Epithelial membrane protein 3                                                              |
| 212154_at   | <i>SDC2</i>    | $1.40 \times 10^{-6}$ | $5.16 \times 10^{-5}$ | 21.2 | Syndecan 2                                                                                 |
| 204420_at   | <i>FOSL1</i>   | $1.80 \times 10^{-6}$ | $5.85 \times 10^{-5}$ | 20.9 | FOS-like antigen 1                                                                         |
| 208966_x_at | <i>IFI16</i>   | $1.10 \times 10^{-6}$ | $4.68 \times 10^{-5}$ | 20.9 | Interferon, $\gamma$ -inducible protein 16                                                 |
| 202638_s_at | <i>ICAM1</i>   | $1.30 \times 10^{-6}$ | $5.01 \times 10^{-5}$ | 20.9 | Intercellular adhesion molecule 1                                                          |
| 206332_s_at | <i>IFI16</i>   | $2.60 \times 10^{-6}$ | $6.67 \times 10^{-5}$ | 20.8 | Interferon, $\gamma$ -inducible protein 16                                                 |
| 210042_s_at | <i>CTSZ</i>    | $1.40 \times 10^{-6}$ | $5.16 \times 10^{-5}$ | 20.4 | Cathepsin Z                                                                                |
| 203939_at   | <i>NT5E</i>    | $9.00 \times 10^{-7}$ | $4.39 \times 10^{-5}$ | 20.4 | 5'-Nucleotidase, ecto (CD73)                                                               |
| 212698_s_at | <i>10-Sep</i>  | $9.00 \times 10^{-7}$ | $4.39 \times 10^{-5}$ | 20.2 | Septin 10                                                                                  |
| 202856_s_at | <i>SLC16A3</i> | $9.00 \times 10^{-7}$ | $4.39 \times 10^{-5}$ | 20.1 | Solute carrier family 16, member 3 (monocarboxylic acid transporter 4)                     |
| 207733_x_at | <i>PSG9</i>    | $2.40 \times 10^{-6}$ | $6.42 \times 10^{-5}$ | 20.0 | Pregnancy specific $\beta$ -1-glycoprotein 9                                               |
| 215034_s_at | <i>TM4SF1</i>  | $7.00 \times 10^{-7}$ | $4.25 \times 10^{-5}$ | 19.9 | Transmembrane 4 L six family member 1                                                      |
| 201012_at   | <i>ANXA1</i>   | $9.00 \times 10^{-7}$ | $4.39 \times 10^{-5}$ | 19.7 | Annexin A1                                                                                 |
| 203695_s_at | <i>DFNA5</i>   | $2.90 \times 10^{-6}$ | $7.07 \times 10^{-5}$ | 19.7 | Deafness, autosomal dominant 5                                                             |
| 214452_at   | <i>BCAT1</i>   | $1.58 \times 10^{-5}$ | $1.80 \times 10^{-4}$ | 19.6 | Branched chain aminotransferase 1, cytosolic                                               |
| 202637_s_at | <i>ICAM1</i>   | $1.10 \times 10^{-6}$ | $4.68 \times 10^{-5}$ | 19.5 | Intercellular adhesion molecule 1                                                          |
| 209191_at   | <i>TUBB6</i>   | $7.00 \times 10^{-7}$ | $4.25 \times 10^{-5}$ | 19.5 | Tubulin, $\beta 6$                                                                         |
| 209576_at   | <i>GNAI1</i>   | $1.35 \times 10^{-4}$ | $5.76 \times 10^{-4}$ | 19.1 | Guanine nucleotide binding protein (G protein), $\alpha$ inhibiting activity polypeptide 1 |
| 202345_s_at | <i>FABP5</i>   | $7.00 \times 10^{-7}$ | $4.25 \times 10^{-5}$ | 18.8 | Fatty acid binding protein 5 (psoriasis-associated)                                        |
| 203440_at   | <i>CDH2</i>    | $3.40 \times 10^{-6}$ | $7.62 \times 10^{-5}$ | 18.7 | Cadherin 2, type 1, N-cadherin (neuronal)                                                  |
| 206857_s_at | <i>FKBP1B</i>  | $2.45 \times 10^{-5}$ | $2.33 \times 10^{-4}$ | 18.4 | FK506 binding protein 1B, 12.6 kda                                                         |
| 201325_s_at | <i>EMP1</i>    | $3.30 \times 10^{-6}$ | $7.62 \times 10^{-5}$ | 18.4 | Epithelial membrane protein 1                                                              |
| 202196_s_at | <i>DKK3</i>    | $2.46 \times 10^{-5}$ | $2.33 \times 10^{-4}$ | 18.3 | Dickkopf homolog 3 ( <i>Xenopus laevis</i> )                                               |

|             |                 |                       |                       |      |                                                                                                         |
|-------------|-----------------|-----------------------|-----------------------|------|---------------------------------------------------------------------------------------------------------|
| 202949_s_at | <i>FHL2</i>     | $2.10 \times 10^{-6}$ | $6.22 \times 10^{-5}$ | 18.2 | Four and a half LIM domains 2                                                                           |
| 203851_at   | <i>IGFBP6</i>   | $1.10 \times 10^{-6}$ | $4.68 \times 10^{-5}$ | 18.1 | Insulin-like growth factor binding protein 6                                                            |
| 209156_s_at | <i>COL6A2</i>   | $8.00 \times 10^{-7}$ | $4.28 \times 10^{-5}$ | 18.1 | Collagen, type VI, $\alpha 2$                                                                           |
| 209087_x_at | <i>MCAM</i>     | $2.30 \times 10^{-6}$ | $6.36 \times 10^{-5}$ | 18.1 | Melanoma cell adhesion molecule                                                                         |
| 212094_at   | <i>PEG10</i>    | $3.50 \times 10^{-6}$ | $7.64 \times 10^{-5}$ | 18.0 | Paternally expressed 10                                                                                 |
| 201616_s_at | <i>CALD1</i>    | $2.08 \times 10^{-5}$ | $2.14 \times 10^{-4}$ | 17.8 | Caldesmon 1                                                                                             |
| 204466_s_at | <i>SNCA</i>     | $2.50 \times 10^{-6}$ | $6.48 \times 10^{-5}$ | 17.7 | Synuclein, $\alpha$ (non A4 component of amyloid precursor)                                             |
| 212607_at   | <i>AKT3</i>     | $2.14 \times 10^{-5}$ | $2.16 \times 10^{-4}$ | 17.6 | V-akt murine thymoma viral oncogene homolog 3 (protein kinase B, $\gamma$ )                             |
| 211980_at   | <i>COL4A1</i>   | $2.42 \times 10^{-5}$ | $2.33 \times 10^{-4}$ | 17.6 | Collagen, type IV, $\alpha 1$                                                                           |
| 209283_at   | <i>CRYAB</i>    | $1.10 \times 10^{-6}$ | $4.68 \times 10^{-5}$ | 17.3 | Crystallin, $\alpha B$                                                                                  |
| 212158_at   | <i>SDC2</i>     | $2.80 \times 10^{-6}$ | $6.97 \times 10^{-5}$ | 17.2 | Syndecan 2                                                                                              |
| 212774_at   | <i>ZNF238</i>   | $2.75 \times 10^{-5}$ | $2.45 \times 10^{-4}$ | 17.2 | Zinc finger protein 238                                                                                 |
| 206382_s_at | <i>BDNF</i>     | $1.70 \times 10^{-6}$ | $5.75 \times 10^{-5}$ | 17.2 | Brain-derived neurotrophic factor                                                                       |
| 211071_s_at | <i>MLLT11</i>   | $5.80 \times 10^{-6}$ | $1.03 \times 10^{-4}$ | 16.9 | Myeloid/lymphoid or mixed-lineage leukemia (trithorax homolog, <i>Drosophila</i> ); translocated to, 11 |
| 206953_s_at | <i>LPHN2</i>    | $1.65 \times 10^{-5}$ | $1.85 \times 10^{-4}$ | 16.6 | Latrophilin 2                                                                                           |
| 205830_at   | <i>CLGN</i>     | $2.80 \times 10^{-5}$ | $2.47 \times 10^{-4}$ | 16.4 | Calmeglin                                                                                               |
| 220994_s_at | <i>STXBP6</i>   | $1.20 \times 10^{-6}$ | $4.82 \times 10^{-5}$ | 16.3 | Syntaxin binding protein 6 (amisyn)                                                                     |
| 204885_s_at | <i>MSLN</i>     | $3.80 \times 10^{-6}$ | $7.72 \times 10^{-5}$ | 16.3 | Mesothelin                                                                                              |
| 211003_x_at | <i>TGM2</i>     | $2.45 \times 10^{-5}$ | $2.33 \times 10^{-4}$ | 15.9 | Transglutaminase 2 (C polypeptide, protein-glutamine- $\gamma$ -glutamyltransferase)                    |
| 211719_x_at | <i>FN1</i>      | $2.40 \times 10^{-6}$ | $6.42 \times 10^{-5}$ | 15.9 | Fibronectin 1                                                                                           |
| 206467_x_at | <i>TNFRSF6B</i> | $1.00 \times 10^{-6}$ | $4.61 \times 10^{-5}$ | 15.9 | Tumor necrosis factor receptor superfamily, member 6b, decoy                                            |
| 45714_at    | <i>HCFC1R1</i>  | $2.50 \times 10^{-6}$ | $6.48 \times 10^{-5}$ | 15.8 | Host cell factor C1 regulator 1 (XPO1 dependent)                                                        |
| 214321_at   | <i>NOV</i>      | $4.09 \times 10^{-4}$ | $1.08 \times 10^{-4}$ | 15.6 | Nephroblastoma overexpressed gene                                                                       |
| 208025_s_at | <i>HMG A2</i>   | $1.22 \times 10^{-5}$ | $1.55 \times 10^{-4}$ | 15.5 | High mobility group AT-hook 2                                                                           |
| 206029_at   | <i>ANKRD1</i>   | $2.30 \times 10^{-6}$ | $6.36 \times 10^{-5}$ | 15.4 | Ankyrin repeat domain 1 (cardiac muscle)                                                                |
| 220027_s_at | <i>RASIP1</i>   | $1.80 \times 10^{-6}$ | $5.85 \times 10^{-5}$ | 15.3 | Ras-interacting protein 1                                                                               |
| 212233_at   | <i>MAP1B</i>    | $2.84 \times 10^{-4}$ | $8.68 \times 10^{-4}$ | 15.2 | Microtubule-associated protein 1B                                                                       |
| 203820_s_at | <i>IGF2BP3</i>  | $6.28 \times 10^{-5}$ | $3.74 \times 10^{-4}$ | 15.2 | Insulin-like growth factor 2 mRNA binding protein 3                                                     |

|             |                 |                       |                       |      |                                                                                                                        |
|-------------|-----------------|-----------------------|-----------------------|------|------------------------------------------------------------------------------------------------------------------------|
| 209288_s_at | <i>CDC42EP3</i> | $4.48 \times 10^{-5}$ | $3.12 \times 10^{-4}$ | 15.1 | CDC42 effector protein ( $\rho$ GTPase binding) 3                                                                      |
| 204688_at   | <i>SGCE</i>     | $5.20 \times 10^{-6}$ | $9.58 \times 10^{-5}$ | 15.0 | Sarcoglycan, $\epsilon$                                                                                                |
| 209594_x_at | <i>PSG9</i>     | $4.80 \times 10^{-6}$ | $9.01 \times 10^{-5}$ | 14.9 | Pregnancy specific $\beta$ -1-glycoprotein 9                                                                           |
| 206295_at   | <i>IL18</i>     | $3.40 \times 10^{-6}$ | $7.62 \times 10^{-5}$ | 14.9 | Interleukin 18 (interferon- $\gamma$ -inducing factor)                                                                 |
| 212509_s_at | <i>MXRA7</i>    | $3.00 \times 10^{-6}$ | $7.21 \times 10^{-5}$ | 14.8 | Matrix-remodelling associated 7                                                                                        |
| 207876_s_at | <i>FLNC</i>     | $1.01 \times 10^{-5}$ | $1.41 \times 10^{-4}$ | 14.5 | Filamin C, $\gamma$ (actin binding protein 280)                                                                        |
| 211573_x_at | <i>TGM2</i>     | $2.00 \times 10^{-6}$ | $6.07 \times 10^{-5}$ | 14.3 | Transglutaminase 2 (C polypeptide, protein-glutamine- $\gamma$ -glutamyltransferase)                                   |
| 213620_s_at | <i>ICAM2</i>    | $4.20 \times 10^{-6}$ | $8.29 \times 10^{-5}$ | 14.2 | Intercellular adhesion molecule 2                                                                                      |
| 219271_at   | <i>GALNT14</i>  | $3.40 \times 10^{-6}$ | $7.62 \times 10^{-5}$ | 14.2 | UDP- <i>N</i> -acetyl- $\alpha$ -D-galactosamine:polypeptide <i>N</i> -acetylgalactosaminyltransferase 14 (GalNac-T14) |
| 212464_s_at | <i>FN1</i>      | $4.30 \times 10^{-6}$ | $8.36 \times 10^{-5}$ | 14.1 | Fibronectin 1                                                                                                          |
| 215047_at   | <i>TRIM58</i>   | $3.10 \times 10^{-6}$ | $7.35 \times 10^{-5}$ | 14.0 | Tripartite motif-containing 58                                                                                         |
| 210495_x_at | <i>FN1</i>      | $6.00 \times 10^{-6}$ | $1.06 \times 10^{-4}$ | 14.0 | Fibronectin 1                                                                                                          |
| 221059_s_at | <i>CHST6</i>    | $2.10 \times 10^{-6}$ | $6.22 \times 10^{-5}$ | 13.9 | Carbohydrate ( <i>N</i> -acetylglucosamine 6- <i>O</i> ) sulfotransferase 6                                            |
| 201123_s_at | <i>EIF5A</i>    | $4.40 \times 10^{-6}$ | $8.49 \times 10^{-5}$ | 13.8 | Eukaryotic translation initiation factor 5A                                                                            |
| 209356_x_at | <i>EFEMP2</i>   | $2.50 \times 10^{-6}$ | $6.48 \times 10^{-5}$ | 13.8 | EGF-containing fibulin-like extracellular matrix protein 2                                                             |
| 212563_at   | <i>BOP1</i>     | $1.40 \times 10^{-6}$ | $5.16 \times 10^{-5}$ | 13.7 | Block of proliferation 1                                                                                               |
| 214439_x_at | <i>BIN1</i>     | $1.40 \times 10^{-6}$ | $5.16 \times 10^{-5}$ | 13.4 | Bridging integrator 1                                                                                                  |
| 203810_at   | <i>DNAJB4</i>   | $2.53 \times 10^{-5}$ | $2.34 \times 10^{-4}$ | 13.4 | DnaJ (Hsp40) homolog, subfamily B, member 4                                                                            |
| 216442_x_at | <i>FN1</i>      | $1.76 \times 10^{-5}$ | $1.90 \times 10^{-4}$ | 13.3 | Fibronectin 1                                                                                                          |
| 214023_x_at | <i>TUBB2B</i>   | $3.88 \times 10^{-4}$ | $1.04 \times 10^{-4}$ | 13.2 | Tubulin, $\beta$ 2B                                                                                                    |
| 204030_s_at | <i>SCHIP1</i>   | $2.85 \times 10^{-4}$ | $8.68 \times 10^{-4}$ | 13.2 | Schwannomin interacting protein 1                                                                                      |
| 212859_x_at | <i>MT1E</i>     | $8.50 \times 10^{-6}$ | $1.27 \times 10^{-4}$ | 13.0 | Metallothionein 1E                                                                                                     |
| 207419_s_at | <i>RAC2</i>     | $3.90 \times 10^{-6}$ | $7.86 \times 10^{-5}$ | 13.0 | Ras-related C3 botulinum toxin substrate 2 ( $\rho$ family, small GTP binding protein Rac2)                            |
| 200923_at   | <i>LGALS3BP</i> | $2.30 \times 10^{-6}$ | $6.36 \times 10^{-5}$ | 13.0 | Lectin, galactoside-binding, soluble, 3 binding protein                                                                |
| 202236_s_at | <i>SLC16A1</i>  | $8.70 \times 10^{-6}$ | $1.27 \times 10^{-4}$ | 12.9 | Solute carrier family 16, member 1 (monocarboxylic acid transporter 1)                                                 |
| 202806_at   | <i>DBN1</i>     | $1.80 \times 10^{-6}$ | $5.85 \times 10^{-5}$ | 12.9 | Drebrin 1                                                                                                              |
| 214071_at   | <i>GNAL</i>     | $8.20 \times 10^{-6}$ | $1.24 \times 10^{-4}$ | 12.9 | Guanine nucleotide binding protein (G protein), $\alpha$ activating activity polypeptide, olfactory type               |

|             |                  |                       |                       |      |                                                                                              |
|-------------|------------------|-----------------------|-----------------------|------|----------------------------------------------------------------------------------------------|
| 221185_s_at | <i>IQCG</i>      | $9.20 \times 10^{-6}$ | $1.31 \times 10^{-4}$ | 12.8 | IQ motif containing G                                                                        |
| 209763_at   | <i>CHRD1</i>     | $4.66 \times 10^{-5}$ | $3.21 \times 10^{-4}$ | 12.8 | Chordin-like 1                                                                               |
| 205548_s_at | <i>BTG3</i>      | $2.00 \times 10^{-6}$ | $6.07 \times 10^{-5}$ | 12.7 | BTG family, member 3                                                                         |
| 210933_s_at | <i>FSCN1</i>     | $1.91 \times 10^{-4}$ | $6.97 \times 10^{-4}$ | 12.5 | Fascin homolog 1, actin-bundling protein ( <i>Strongylocentrotus purpuratus</i> )            |
| 204141_at   | <i>TUBB2A</i>    | $4.50 \times 10^{-6}$ | $8.61 \times 10^{-5}$ | 12.4 | Tubulin, $\beta$ 2A                                                                          |
| 213113_s_at | <i>SLC43A3</i>   | $1.14 \times 10^{-5}$ | $1.49 \times 10^{-4}$ | 12.3 | Solute carrier family 43, member 3                                                           |
| 204639_at   | <i>ADA</i>       | $3.70 \times 10^{-6}$ | $7.70 \times 10^{-5}$ | 12.2 | Adenosine deaminase                                                                          |
| 212647_at   | <i>RRAS</i>      | $3.80 \times 10^{-6}$ | $7.72 \times 10^{-5}$ | 12.2 | Related RAS viral (r-ras) oncogene homolog                                                   |
| 210609_s_at | <i>TP53I3</i>    | $2.20 \times 10^{-6}$ | $6.26 \times 10^{-5}$ | 12.2 | Tumor protein p53 inducible protein 3                                                        |
| 204589_at   | <i>NUAK1</i>     | $6.30 \times 10^{-6}$ | $1.07 \times 10^{-4}$ | 12.1 | NUAK family, SNF1-like kinase, 1                                                             |
| 204279_at   | <i>PSMB9</i>     | $4.80 \times 10^{-6}$ | $9.01 \times 10^{-5}$ | 12.1 | Proteasome (prosome, macropain) subunit, $\beta$ type, 9 (large multifunctional peptidase 2) |
| 202656_s_at | <i>SERTAD2</i>   | $1.42 \times 10^{-5}$ | $1.70 \times 10^{-4}$ | 12.0 | SERTA domain containing 2                                                                    |
| 205990_s_at | <i>WNT5A</i>     | $5.00 \times 10^{-6}$ | $9.28 \times 10^{-5}$ | 11.9 | Wingless-type MMTV integration site family, member 5A                                        |
| 210201_x_at | <i>BIN1</i>      | $3.19 \times 10^{-5}$ | $2.61 \times 10^{-4}$ | 11.8 | Bridging integrator 1                                                                        |
| 220565_at   | <i>CCR10</i>     | $2.00 \times 10^{-6}$ | $6.07 \times 10^{-5}$ | 11.8 | Chemokine (C-C motif) receptor 10                                                            |
| 211564_s_at | <i>PDLIM4</i>    | $6.60 \times 10^{-6}$ | $1.10 \times 10^{-4}$ | 11.8 | PDZ and LIM domain 4                                                                         |
| 200808_s_at | <i>ZYX</i>       | $3.00 \times 10^{-6}$ | $7.21 \times 10^{-5}$ | 11.8 | Zyxin                                                                                        |
| 213134_x_at | <i>BTG3</i>      | $2.00 \times 10^{-6}$ | $6.07 \times 10^{-5}$ | 11.8 | BTG family, member 3                                                                         |
| 206580_s_at | <i>EFEMP2</i>    | $2.79 \times 10^{-5}$ | $2.46 \times 10^{-4}$ | 11.8 | EGF-containing fibulin-like extracellular matrix protein 2                                   |
| 208790_s_at | <i>PTRF</i>      | $3.30 \times 10^{-6}$ | $7.62 \times 10^{-5}$ | 11.7 | Polymerase I and transcript release factor                                                   |
| 204298_s_at | <i>LOX</i>       | $2.53 \times 10^{-5}$ | $2.34 \times 10^{-4}$ | 11.7 | Lysyl oxidase                                                                                |
| 211458_s_at | <i>GABARAPL3</i> | $1.48 \times 10^{-4}$ | $6.11 \times 10^{-4}$ | 11.6 | GABA(A) receptors associated protein like 3 (pseudogene)                                     |
| 201641_at   | <i>BST2</i>      | $2.40 \times 10^{-6}$ | $6.42 \times 10^{-5}$ | 11.6 | Bone marrow stromal cell antigen 2                                                           |
| 202075_s_at | <i>PLTP</i>      | $2.20 \times 10^{-6}$ | $6.26 \times 10^{-5}$ | 11.5 | Phospholipid transfer protein                                                                |
| 201348_at   | <i>GPX3</i>      | $3.60 \times 10^{-6}$ | $7.69 \times 10^{-5}$ | 11.4 | Glutathione peroxidase 3 (plasma)                                                            |
| 205229_s_at | <i>COCH</i>      | $6.50 \times 10^{-6}$ | $1.09 \times 10^{-4}$ | 11.4 | Coagulation factor C homolog, cochlin ( <i>Limulus polyphemus</i> )                          |
| 209537_at   | <i>EXTL2</i>     | $1.62 \times 10^{-5}$ | $1.83 \times 10^{-4}$ | 11.4 | Exostoses (multiple)-like 2                                                                  |
| 202657_s_at | <i>SERTAD2</i>   | $3.21 \times 10^{-5}$ | $2.62 \times 10^{-4}$ | 11.3 | SERTA domain containing 2                                                                    |

|             |                 |                       |                       |      |                                                                                                    |
|-------------|-----------------|-----------------------|-----------------------|------|----------------------------------------------------------------------------------------------------|
| 218537_at   | <i>HCFC1R1</i>  | $1.45 \times 10^{-5}$ | $1.71 \times 10^{-4}$ | 11.2 | Host cell factor C1 regulator 1 (XPO1 dependent)                                                   |
| 205924_at   | <i>RAB3B</i>    | $8.03 \times 10^{-5}$ | $4.29 \times 10^{-4}$ | 11.2 | RAB3B, member RAS oncogene family                                                                  |
| 214091_s_at | <i>GPX3</i>     | $3.40 \times 10^{-6}$ | $7.62 \times 10^{-5}$ | 11.0 | Glutathione peroxidase 3 (plasma)                                                                  |
| 201983_s_at | <i>EGFR</i>     | $1.76 \times 10^{-5}$ | $1.90 \times 10^{-4}$ | 11.0 | Epidermal growth factor receptor (erythroblastic leukemia viral (v-erb-b) oncogene homolog, avian) |
| 213924_at   | <i>MPPE1</i>    | $3.35 \times 10^{-5}$ | $2.69 \times 10^{-4}$ | 11.0 | Metallophosphoesterase 1                                                                           |
| 203085_s_at | <i>TGFB1</i>    | $7.80 \times 10^{-6}$ | $1.19 \times 10^{-4}$ | 10.9 | Transforming growth factor, $\beta$ 1                                                              |
| 220892_s_at | <i>PSAT1</i>    | $5.70 \times 10^{-6}$ | $1.03 \times 10^{-4}$ | 10.9 | Phosphoserine aminotransferase 1                                                                   |
| 212358_at   | <i>CLIP3</i>    | $4.00 \times 10^{-6}$ | $7.99 \times 10^{-5}$ | 10.9 | CAP-GLY domain containing linker protein 3                                                         |
| 210220_at   | <i>FZD2</i>     | $2.60 \times 10^{-6}$ | $6.67 \times 10^{-5}$ | 10.8 | Frizzled homolog 2 ( <i>Drosophila</i> )                                                           |
| 206825_at   | <i>OXR</i>      | $1.31 \times 10^{-5}$ | $1.64 \times 10^{-4}$ | 10.7 | Oxytocin receptor                                                                                  |
| 219806_s_at | <i>C11orf75</i> | $1.16 \times 10^{-5}$ | $1.50 \times 10^{-4}$ | 10.7 | Chromosome 11 open reading frame 75                                                                |
| 218618_s_at | <i>FNDC3B</i>   | $7.00 \times 10^{-6}$ | $1.12 \times 10^{-4}$ | 10.6 | Fibronectin type III domain containing 3B                                                          |
| 206074_s_at | <i>HMGA1</i>    | $3.00 \times 10^{-6}$ | $7.21 \times 10^{-5}$ | 10.5 | High mobility group AT-hook 1                                                                      |
| 209365_s_at | <i>ECM1</i>     | $2.40 \times 10^{-6}$ | $6.42 \times 10^{-5}$ | 10.4 | Extracellular matrix protein 1                                                                     |
| 221974_at   | <i>IPW</i>      | $1.69 \times 10^{-4}$ | $6.50 \times 10^{-4}$ | 10.3 | Imprinted in Prader-Willi syndrome (non-protein coding)                                            |
| 206421_s_at | <i>SERPINB7</i> | $6.09 \times 10^{-5}$ | $3.68 \times 10^{-4}$ | 10.3 | Serpin peptidase inhibitor, clade B (ovalbumin), member 7                                          |
| 201649_at   | <i>UBE2L6</i>   | $1.18 \times 10^{-5}$ | $1.52 \times 10^{-4}$ | 10.2 | Ubiquitin-conjugating enzyme E2L 6                                                                 |

\*FDR = false discovery rate; MDR/TAP = multidrug resistant/transporter associated with antigen processing; PRKA = protein kinase A; SNRPN = small nuclear ribonucleoprotein polypeptide N; FXYD = FXYD domain-containing ion transport regulator; WW domain = small 38 to 40 amino acid residue modules that have been reported to bind to proline-rich sequences; PALM2-AKAP2 = paralemmin 2 isoform a-A kinase (PRKA) anchor protein 2 isoform 1; CDK4 = cyclin-dependent kinase 4; EF-hand = a high affinity  $\text{Ca}^{+2}$ -binding motif; FGR = Gardner-Rasheed feline sarcoma viral (v-fgr) oncogene homolog; YES = v-yes-1 Yamaguchi sarcoma viral oncogene homolog 1; FOS = FBJ murine osteosarcoma viral oncogene homolog; FK506 = tacrolimus or fujimycin; LIM domains = double zinc fingers; XPO1 = exportin-1; CDC42 = cell division control protein 42 homolog; EGF = epidermal growth factor; IQ motif = uninterrupted seven-turn  $\alpha$ -helix that is amphiphilic; BTG = B-cell translocation gene; NUA1 = AMP-activated protein kinase family member; SNF1 = sucrose nonfermenting; SERTA = p34 (*SEI1*), Replication Protein A Binding Trans-activator 1, and *Drosophila taranis* (*TARA*) motif; MMTV = mouse mammary tumor virus; PDZ = this is a common structural domain of 80-90 amino acids and it is an acronym combining the first letters of three proteins--post synaptic density protein (PSD95), *Drosophila* disc large tumor

suppressor (DlgA), and zonula occludens-1 protein (zo-1); GABA =  $\gamma$ -aminobutyric acid; CAP-GLY domain = glycine-rich domain of about 42 residues found in cytoskeleton-associated proteins.

† Two-sample  $t$  test (with random variance model) was used to discriminate between the MCF-7 and MCF-7/ADR cells. Univariate test random variance model parameters were as follows:  $a = 1.68165$ ;  $b = 14.3422$ ; Kolmogorov–Smirnov statistic = 0.03998. Nominal statistical significance level of each univariate test was .001. All statistical tests were two-sided.
