# Supplementary material
Source: PubMed Central journal article supplement (PMC2970576)
Supplement: supp_djq361_jnci-JNCI-09-1342-s06.pdf [file supp_djq361_jnci-JNCI-09-1342-s06.pdf]

**Supplementary Table 2.** Statistically significant genes with greater than tenfold decreased expression in MCF-7/ADR cells\*

| Probe set   | Gene symbol    | Parametric <i>P</i> †    | FDR                      | Fold change | Description                                                            |
|-------------|----------------|--------------------------|--------------------------|-------------|------------------------------------------------------------------------|
| 209173_at   | <i>AGR2</i>    | 1.00 x 10 <sup>-07</sup> | 2.16 x 10 <sup>-05</sup> | -322.3      | Anterior gradient homolog 2 ( <i>Xenopus laevis</i> )                  |
| 200633_at   | <i>UBB</i>     | 1.30 x 10 <sup>-06</sup> | 5.01 x 10 <sup>-05</sup> | -301.6      | Ubiquitin B                                                            |
| 205009_at   | <i>TFF1</i>    | 5.00 x 10 <sup>-07</sup> | 3.66 x 10 <sup>-05</sup> | -296.8      | Trefoil factor 1                                                       |
| 201131_s_at | <i>CDH1</i>    | < 1 x 10 <sup>-07</sup>  | < 1 x 10 <sup>-07</sup>  | -288.6      | Cadherin 1, type 1, E-cadherin (epithelial)                            |
| 201650_at   | <i>KRT19</i>   | 7.00 x 10 <sup>-07</sup> | 4.25 x 10 <sup>-05</sup> | -272.7      | Keratin 19                                                             |
| 216231_s_at | <i>B2M</i>     | 1.00 x 10 <sup>-07</sup> | 2.16 x 10 <sup>-05</sup> | -167.8      | β2-Microglobulin                                                       |
| 204351_at   | <i>S100P</i>   | 1.00 x 10 <sup>-07</sup> | 2.16 x 10 <sup>-05</sup> | -132.7      | S100 calcium binding protein P                                         |
| 205225_at   | <i>ESR1</i>    | 1.00 x 10 <sup>-07</sup> | 2.16 x 10 <sup>-05</sup> | -126.0      | Estrogen receptor 1                                                    |
| 215001_s_at | <i>GLUL</i>    | 1.00 x 10 <sup>-07</sup> | 2.16 x 10 <sup>-05</sup> | -112.5      | Glutamate-ammonia ligase (glutamine synthetase)                        |
| 219795_at   | <i>SLC6A14</i> | 1.00 x 10 <sup>-07</sup> | 2.16 x 10 <sup>-05</sup> | -107.4      | Solute carrier family 6 (amino acid transporter), member 14            |
| 201818_at   | <i>LPCAT1</i>  | 1.00 x 10 <sup>-07</sup> | 2.16 x 10 <sup>-05</sup> | -97.6       | Lysophosphatidylcholine acyltransferase 1                              |
| 210907_s_at | <i>PDCD10</i>  | 1.00 x 10 <sup>-07</sup> | 2.16 x 10 <sup>-05</sup> | -92.0       | Programmed cell death 10                                               |
| 202489_s_at | <i>FXVD3</i>   | 1.00 x 10 <sup>-07</sup> | 2.16 x 10 <sup>-05</sup> | -89.1       | FXVD domain containing ion transport regulator 3                       |
| 205862_at   | <i>GREB1</i>   | 9.00 x 10 <sup>-07</sup> | 4.39 x 10 <sup>-05</sup> | -89.1       | GREB1 protein                                                          |
| 218435_at   | <i>DNAJC15</i> | 1.00 x 10 <sup>-07</sup> | 2.16 x 10 <sup>-05</sup> | -81.7       | DnaJ (Hsp40) homolog, subfamily C, member 15                           |
| 209301_at   | <i>CA2</i>     | 1.23 x 10 <sup>-05</sup> | 0.0001553                | -79.0       | Carbonic anhydrase II                                                  |
| 219197_s_at | <i>SCUBE2</i>  | 2.00 x 10 <sup>-06</sup> | 6.07 x 10 <sup>-05</sup> | -71.8       | Signal peptide, CUB domain, EGF-like 2                                 |
| 202291_s_at | <i>MGP</i>     | 2.00 x 10 <sup>-07</sup> | 2.69 x 10 <sup>-05</sup> | -71.1       | Matrix Gla protein                                                     |
| 218966_at   | <i>MYO5C</i>   | 1.00 x 10 <sup>-07</sup> | 2.16 x 10 <sup>-05</sup> | -66.3       | Myosin VC                                                              |
| 201884_at   | <i>CEACAM5</i> | 8.00 x 10 <sup>-07</sup> | 4.28 x 10 <sup>-05</sup> | -64.7       | Carcinoembryonic antigen-related cell adhesion molecule 5              |
| 201565_s_at | <i>ID2</i>     | 2.00 x 10 <sup>-07</sup> | 2.69 x 10 <sup>-05</sup> | -58.8       | Inhibitor of DNA binding 2, dominant negative helix-loop-helix protein |
| 217388_s_at | <i>KYNU</i>    | 2.00 x 10 <sup>-07</sup> | 2.69 x 10 <sup>-05</sup> | -55.3       | Kynureninase (L-kynurenine hydrolase)                                  |
| 218729_at   | <i>LXN</i>     | 2.00 x 10 <sup>-07</sup> | 2.69 x 10 <sup>-05</sup> | -53.6       | Latexin                                                                |
| 207430_s_at | <i>MSMB</i>    | 5.00 x 10 <sup>-07</sup> | 3.66 x 10 <sup>-05</sup> | -52.9       | Microseminoprotein, β                                                  |
| 213285_at   | <i>TMEM30B</i> | 3.00 x 10 <sup>-07</sup> | 3.18 x 10 <sup>-05</sup> | -50.4       | Transmembrane protein 30B                                              |

|             |                             |                        |                        |       |                                                                                                                 |
|-------------|-----------------------------|------------------------|------------------------|-------|-----------------------------------------------------------------------------------------------------------------|
| 211379_x_at | <i>B3GALNT1</i>             | $4.00 \times 10^{-07}$ | $3.49 \times 10^{-05}$ | -49.8 | $\beta$ -1,3- <i>N</i> -Acetylgalactosaminyltransferase 1 (globoside blood group)                               |
| 211657_at   | <i>CEACAM6</i>              | $2.00 \times 10^{-07}$ | $2.69 \times 10^{-05}$ | -49.3 | Carcinoembryonic antigen-related cell adhesion molecule 6 (non-specific cross reacting antigen)                 |
| 203397_s_at | <i>GALNT3</i>               | $5.00 \times 10^{-07}$ | $3.66 \times 10^{-05}$ | -47.3 | UDP- <i>N</i> -acetyl-alpha-D-galactosamine:polypeptide <i>N</i> -acetylgalactosaminyltransferase 3 (GalNac-T3) |
| 205696_s_at | <i>GFRA1</i>                | $4.00 \times 10^{-07}$ | $3.49 \times 10^{-05}$ | -47.0 | GDNF family receptor $\alpha$ 1                                                                                 |
| 209602_s_at | <i>GATA3</i>                | $3.89 \times 10^{-05}$ | 0.0002889              | -44.9 | GATA binding protein 3                                                                                          |
| 203962_s_at | <i>NEBL</i>                 | $2.00 \times 10^{-07}$ | $2.69 \times 10^{-05}$ | -43.7 | Nebulette                                                                                                       |
| 219121_s_at | <i>RBM35A</i>               | $3.00 \times 10^{-07}$ | $3.18 \times 10^{-05}$ | -43.2 | RNA binding motif protein 35A                                                                                   |
| 218677_at   | <i>S100A14</i>              | $3.00 \times 10^{-07}$ | $3.18 \times 10^{-05}$ | -43.1 | S100 calcium binding protein A14                                                                                |
| 210297_s_at | <i>MSMB</i>                 | $2.00 \times 10^{-07}$ | $2.69 \times 10^{-05}$ | -41.9 | $\beta$ -Microseminoprotein                                                                                     |
| 209459_s_at | <i>ABAT</i>                 | $6.40 \times 10^{-06}$ | 0.000108               | -41.4 | 4-Aminobutyrate aminotransferase                                                                                |
| 204798_at   | <i>MYB</i>                  | $2.00 \times 10^{-07}$ | $2.69 \times 10^{-05}$ | -40.8 | V-myb myeloblastosis viral oncogene homolog (avian)                                                             |
| 204105_s_at | <i>NRCAM</i>                | $3.00 \times 10^{-07}$ | $3.18 \times 10^{-05}$ | -39.3 | Neuronal cell adhesion molecule                                                                                 |
| 202286_s_at | <i>TACSTD2</i>              | $1.70 \times 10^{-06}$ | $5.75 \times 10^{-05}$ | -37.5 | Tumor-associated calcium signal transducer 2                                                                    |
| 221841_s_at | <i>KLF4</i>                 | $8.16 \times 10^{-05}$ | 0.0004329              | -35.7 | Kruppel-like factor 4 (gut)                                                                                     |
| 204019_s_at | <i>SH3YL1</i>               | $5.13 \times 10^{-05}$ | 0.0003346              | -35.4 | SH3 domain containing, Ysc84-like 1 ( <i>Saccharomyces cerevisiae</i> )                                         |
| 207886_s_at | <i>CALCR</i>                | $3.00 \times 10^{-07}$ | $3.18 \times 10^{-05}$ | -35.3 | Calcitonin receptor                                                                                             |
| 203132_at   | <i>RB1</i>                  | $8.00 \times 10^{-07}$ | $4.28 \times 10^{-05}$ | -34.0 | Retinoblastoma 1                                                                                                |
| 208650_s_at | <i>CD24</i>                 | $3.54 \times 10^{-05}$ | 0.0002783              | -33.1 | CD24 molecule                                                                                                   |
| 202890_at   | <i>MAP7</i>                 | $5.00 \times 10^{-07}$ | $3.66 \times 10^{-05}$ | -33.1 | Microtubule-associated protein 7                                                                                |
| 215071_s_at | <i>HIST1H2A</i><br><i>C</i> | $6.20 \times 10^{-06}$ | 0.0001064              | -32.6 | Histone cluster 1, H2AC                                                                                         |
| 209696_at   | <i>FBP1</i>                 | $1.90 \times 10^{-06}$ | $6.07 \times 10^{-05}$ | -32.0 | Fructose-1,6-bisphosphatase 1                                                                                   |
| 220108_at   | <i>GNA14</i>                | $3.00 \times 10^{-07}$ | $3.18 \times 10^{-05}$ | -31.6 | Guanine nucleotide binding protein (G protein), $\alpha$ 14                                                     |
| 202437_s_at | <i>CYP1B1</i>               | $8.70 \times 10^{-06}$ | 0.000127               | -31.1 | Cytochrome P450, family 1, subfamily B, polypeptide 1                                                           |
| 205239_at   | <i>AREG</i>                 | $8.00 \times 10^{-07}$ | $4.28 \times 10^{-05}$ | -30.8 | Amphiregulin                                                                                                    |
| 209603_at   | <i>GATA3</i>                | $1.40 \times 10^{-06}$ | $5.16 \times 10^{-05}$ | -29.6 | GATA binding protein 3                                                                                          |
| 214519_s_at | <i>RLN2</i>                 | $5.00 \times 10^{-07}$ | $3.66 \times 10^{-05}$ | -29.1 | Relaxin 2                                                                                                       |
| 211352_s_at | <i>NCOA3</i>                | $7.48 \times 10^{-05}$ | 0.0004117              | -28.2 | Nuclear receptor coactivator 3                                                                                  |

|             |                        |                          |                          |       |                                                                                                 |
|-------------|------------------------|--------------------------|--------------------------|-------|-------------------------------------------------------------------------------------------------|
| 209591_s_at | <i>BMP7</i>            | 1.03 x 10 <sup>-05</sup> | 0.0001418                | -27.8 | Bone morphogenetic protein 7                                                                    |
| 213568_at   | <i>OSR2</i>            | 1.30 x 10 <sup>-06</sup> | 5.01 x 10 <sup>-05</sup> | -27.5 | Odd-skipped related 2 ( <i>Drosophila</i> )                                                     |
| 204667_at   | <i>FOXA1</i>           | 5.60 x 10 <sup>-06</sup> | 0.0001017                | -26.6 | Forkhead box A1                                                                                 |
| 213245_at   | <i>ADCY1</i>           | 2.16 x 10 <sup>-05</sup> | 0.0002163                | -26.1 | Adenylate cyclase 1 (brain)                                                                     |
| 203757_s_at | <i>CEACAM6</i>         | 1.48 x 10 <sup>-05</sup> | 0.0001729                | -26.0 | Carcinoembryonic antigen-related cell adhesion molecule 6 (non-specific cross reacting antigen) |
| 209687_at   | <i>CXCL12</i>          | 2.70 x 10 <sup>-06</sup> | 6.82 x 10 <sup>-05</sup> | -26.0 | Chemokine (C-X-C motif) ligand 12 (stromal cell-derived factor 1)                               |
| 219090_at   | <i>SLC24A3</i>         | 5.00 x 10 <sup>-07</sup> | 3.66 x 10 <sup>-05</sup> | -26.0 | Solute carrier family 24 (sodium/potassium/calcium exchanger), member 3                         |
| 209604_s_at | <i>GATA3</i>           | 6.10 x 10 <sup>-06</sup> | 0.0001064                | -25.9 | GATA binding protein 3                                                                          |
| 219932_at   | <i>SLC27A6</i>         | 1.20 x 10 <sup>-06</sup> | 4.82 x 10 <sup>-05</sup> | -25.8 | Solute carrier family 27 (fatty acid transporter), member 6                                     |
| 220613_s_at | <i>SYTL2</i>           | 1.00 x 10 <sup>-06</sup> | 4.61 x 10 <sup>-05</sup> | -25.6 | Synaptotagmin-like 2                                                                            |
| 200832_s_at | <i>SCD</i>             | 4.63 x 10 <sup>-05</sup> | 0.00032                  | -25.3 | Stearoyl-CoA desaturase (δ-9-desaturase)                                                        |
| 201130_s_at | <i>CDH1</i>            | 5.97 x 10 <sup>-05</sup> | 0.0003654                | -24.9 | Cadherin 1, type 1, E-cadherin (epithelial)                                                     |
| 266_s_at    | <i>CD24</i>            | 1.41 x 10 <sup>-05</sup> | 0.0001699                | -24.8 | CD24 molecule                                                                                   |
| 36499_at    | <i>CELSR2</i>          | 1.37 x 10 <sup>-05</sup> | 0.0001675                | -24.5 | Cadherin, EGF LAG seven-pass G-type receptor 2 (flamingo homolog, <i>Drosophila</i> )           |
| 219648_at   | <i>MREG</i>            | .0001634                 | 0.0006361                | -24.4 | Melanoregulin                                                                                   |
| 221703_at   | <i>BRIP1</i>           | 4.81 x 10 <sup>-05</sup> | 0.0003237                | -24.3 | BRCA1 interacting protein C-terminal helicase 1                                                 |
| 221024_s_at | <i>SLC2A10</i>         | 6.89 x 10 <sup>-05</sup> | 0.0003945                | -23.9 | Solute carrier family 2 (facilitated glucose transporter), member 10                            |
| 204686_at   | <i>IRS1</i>            | .0001063                 | 0.0005023                | -23.6 | Insulin receptor substrate 1                                                                    |
| 221577_x_at | <i>GDF15</i>           | 1.20 x 10 <sup>-06</sup> | 4.82 x 10 <sup>-05</sup> | -23.5 | Growth differentiation factor 15                                                                |
| 206385_s_at | <i>ANK3</i>            | 1.80 x 10 <sup>-06</sup> | 5.85 x 10 <sup>-05</sup> | -23.1 | Ankyrin 3, node of Ranvier (ankyrin G)                                                          |
| 218280_x_at | <i>HIST2H2A<br/>A3</i> | 9.00 x 10 <sup>-07</sup> | 4.39 x 10 <sup>-05</sup> | -23.1 | Histone cluster 2, H2AA3                                                                        |
| 201839_s_at | <i>EPCAM</i>           | 6.30 x 10 <sup>-05</sup> | 0.0003736                | -22.6 | Epithelial cell adhesion molecule                                                               |
| 211812_s_at | <i>B3GALNT1</i>        | 1.20 x 10 <sup>-06</sup> | 4.82 x 10 <sup>-05</sup> | -22.5 | β-1,3-N-Acetylgalactosaminyltransferase 1 (globoside blood group)                               |
| 219077_s_at | <i>WWOX</i>            | 1.60 x 10 <sup>-06</sup> | 5.65 x 10 <sup>-05</sup> | -22.4 | WW domain containing oxidoreductase                                                             |
| 209911_x_at | <i>HIST1H2B<br/>D</i>  | 1.20 x 10 <sup>-05</sup> | 0.0001535                | -22.4 | Histone cluster 1, H2BD                                                                         |
| 211959_at   | <i>IGFBP5</i>          | 4.35 x 10 <sup>-05</sup> | 0.0003075                | -22.3 | Insulin-like growth factor binding protein 5                                                    |
| 204554_at   | <i>PPP1R3D</i>         | 7.60 x 10 <sup>-06</sup> | 0.0001171                | -21.9 | Protein phosphatase 1, regulatory (inhibitor) subunit 3D                                        |

|             |                    |                          |                          |       |                                                                                                                            |
|-------------|--------------------|--------------------------|--------------------------|-------|----------------------------------------------------------------------------------------------------------------------------|
| 214433_s_at | <i>SELENBP1</i>    | 3.60 x 10 <sup>-06</sup> | 7.69 x 10 <sup>-05</sup> | -21.7 | Selenium binding protein 1                                                                                                 |
| 205413_at   | <i>MPPED2</i>      | 2.10 x 10 <sup>-06</sup> | 6.22 x 10 <sup>-05</sup> | -21.7 | Metallophosphoesterase domain containing 2                                                                                 |
| 207392_x_at | <i>UGT2B15</i>     | 1.60 x 10 <sup>-06</sup> | 5.65 x 10 <sup>-05</sup> | -21.5 | UDP glucuronosyltransferase 2 family, polypeptide B15                                                                      |
| 209460_at   | <i>ABAT</i>        | 9.00 x 10 <sup>-07</sup> | 4.39 x 10 <sup>-05</sup> | -21.4 | 4-Aminobutyrate aminotransferase                                                                                           |
| 214290_s_at | <i>HIST2H2A A3</i> | 3.60 x 10 <sup>-06</sup> | 7.69 x 10 <sup>-05</sup> | -21.3 | Histone cluster 2, H2AA3                                                                                                   |
| 218186_at   | <i>RAB25</i>       | 1.07 x 10 <sup>-05</sup> | 0.0001435                | -21.1 | RAB25, member RAS oncogene family                                                                                          |
| 204112_s_at | <i>HNMT</i>        | 1.00 x 10 <sup>-06</sup> | 4.61 x 10 <sup>-05</sup> | -21.0 | Histamine N-methyltransferase                                                                                              |
| 202708_s_at | <i>HIST2H2B E</i>  | 2.00 x 10 <sup>-06</sup> | 6.07 x 10 <sup>-05</sup> | -20.6 | Histone cluster 2, H2BE                                                                                                    |
| 201566_x_at | <i>ID2</i>         | 1.21 x 10 <sup>-05</sup> | 0.0001544                | -20.4 | Inhibitor of DNA binding 2, dominant negative helix-loop-helix protein                                                     |
| 203961_at   | <i>NEBL</i>        | 2.20 x 10 <sup>-06</sup> | 6.26 x 10 <sup>-05</sup> | -20.3 | Nebulette                                                                                                                  |
| 212148_at   | <i>PBX1</i>        | 1.80 x 10 <sup>-06</sup> | 5.85 x 10 <sup>-05</sup> | -20.2 | Pre-B-cell leukemia homeobox 1                                                                                             |
| 200670_at   | <i>XBP1</i>        | 8.00 x 10 <sup>-07</sup> | 4.28 x 10 <sup>-05</sup> | -20.0 | X-box binding protein 1                                                                                                    |
| 204029_at   | <i>CELSR2</i>      | 1.10 x 10 <sup>-06</sup> | 4.68 x 10 <sup>-05</sup> | -20.0 | Cadherin, EGF LAG seven-pass G-type receptor 2 (flamingo homolog, <i>Drosophila</i> )                                      |
| 204542_at   | <i>ST6GALN AC2</i> | 9.90 x 10 <sup>-06</sup> | 0.0001396                | -19.9 | ST6 ( $\alpha$ -N-acetyl-neuraminy-2,3- $\beta$ -galactosyl-1,3)-N-acetylgalactosaminide $\alpha$ -2,6-sialyltransferase 2 |
| 218170_at   | <i>ISOC1</i>       | 8.96 x 10 <sup>-05</sup> | 0.0004531                | -19.8 | Isochorismatase domain containing 1                                                                                        |
| 203953_s_at | <i>CLDN3</i>       | 2.98 x 10 <sup>-05</sup> | 0.0002526                | -19.3 | Claudin 3                                                                                                                  |
| 207700_s_at | <i>NCOA3</i>       | 5.93 x 10 <sup>-05</sup> | 0.0003643                | -19.2 | Nuclear receptor coactivator 3                                                                                             |
| 210319_x_at | <i>MSX2</i>        | 7.00 x 10 <sup>-07</sup> | 4.25 x 10 <sup>-05</sup> | -19.1 | Msh homeobox 2                                                                                                             |
| 202089_s_at | <i>SLC39A6</i>     | 3.63 x 10 <sup>-05</sup> | 0.0002814                | -19.1 | Solute carrier family 39 (zinc transporter), member 6                                                                      |
| 210663_s_at | <i>KYNU</i>        | 1.20 x 10 <sup>-06</sup> | 4.82 x 10 <sup>-05</sup> | -18.7 | Kynureninase (L-kynurenine hydrolase)                                                                                      |
| 203343_at   | <i>UGDH</i>        | 1.40 x 10 <sup>-05</sup> | 0.0001699                | -18.7 | UDP-glucose dehydrogenase                                                                                                  |
| 200648_s_at | <i>GLUL</i>        | 5.00 x 10 <sup>-06</sup> | 9.28 x 10 <sup>-05</sup> | -18.6 | Glutamate-ammonia ligase (glutamine synthetase)                                                                            |
| 209061_at   | <i>NCOA3</i>       | .0003297                 | 0.0009448                | -18.4 | Nuclear receptor coactivator 3                                                                                             |
| 202435_s_at | <i>CYP1B1</i>      | 3.71 x 10 <sup>-05</sup> | 0.0002845                | -18.2 | Cytochrome P450, family 1, subfamily B, polypeptide 1                                                                      |
| 218559_s_at | <i>MAFB</i>        | 4.50 x 10 <sup>-06</sup> | 8.61 x 10 <sup>-05</sup> | -18.1 | V-maf musculoaponeurotic fibrosarcoma oncogene homolog B (avian)                                                           |
| 201627_s_at | <i>INSIG1</i>      | 4.76 x 10 <sup>-05</sup> | 0.0003234                | -18.0 | Insulin induced gene 1                                                                                                     |
| 211708_s_at | <i>SCD</i>         | 3.80 x 10 <sup>-06</sup> | 7.72 x 10 <sup>-05</sup> | -17.8 | Stearoyl-CoA desaturase ( $\delta$ 9-desaturase)                                                                           |

|             |                 |                        |                        |       |                                                                                         |
|-------------|-----------------|------------------------|------------------------|-------|-----------------------------------------------------------------------------------------|
| 212057_at   | <i>KIAA0182</i> | 0.0002871              | 0.0008725              | -17.8 | Kiaa0182                                                                                |
| 209487_at   | <i>RBPMS</i>    | $1.50 \times 10^{-06}$ | $5.45 \times 10^{-05}$ | -17.6 | RNA binding protein with multiple splicing                                              |
| 210652_s_at | <i>TTC39A</i>   | $1.71 \times 10^{-05}$ | 0.0001883              | -17.5 | Tetratricopeptide repeat domain 39A                                                     |
| 204623_at   | <i>TFF3</i>     | $3.46 \times 10^{-05}$ | 0.0002733              | -17.2 | Trefoil factor 3 (intestinal)                                                           |
| 212096_s_at | <i>MTUS1</i>    | $1.00 \times 10^{-06}$ | $4.61 \times 10^{-05}$ | -16.8 | Mitochondrial tumor suppressor 1                                                        |
| 202376_at   | <i>SERPINA3</i> | .0005709               | 0.0013638              | -16.6 | Serpin peptidase inhibitor, clade A ( $\alpha$ 1 antiproteinase, antitrypsin), member 3 |
| 218035_s_at | <i>RBM47</i>    | $2.20 \times 10^{-06}$ | $6.26 \times 10^{-05}$ | -16.4 | RNA binding motif protein 47                                                            |
| 211712_s_at | <i>ANXA9</i>    | $2.20 \times 10^{-06}$ | $6.26 \times 10^{-05}$ | -16.0 | Annexin A9                                                                              |
| 220488_s_at | <i>BCAS3</i>    | $1.10 \times 10^{-06}$ | $4.68 \times 10^{-05}$ | -15.9 | Breast carcinoma amplified sequence 3                                                   |
| 221728_x_at | <i>XIST</i>     | $7.40 \times 10^{-06}$ | 0.0001165              | -15.5 | X (inactive)-specific transcript (non-protein coding)                                   |
| 205286_at   | <i>TFAP2C</i>   | $3.70 \times 10^{-06}$ | $7.70 \times 10^{-05}$ | -15.4 | Transcription factor AP-2 $\gamma$ (activating enhancer binding protein 2 $\gamma$ )    |
| 201855_s_at | <i>ATMIN</i>    | $3.07 \times 10^{-05}$ | 0.0002546              | -15.3 | ATM interactor                                                                          |
| 215073_s_at | <i>NR2F2</i>    | $9.01 \times 10^{-05}$ | 0.0004533              | -15.2 | Nuclear receptor subfamily 2, group F, member 2                                         |
| 211421_s_at | <i>RET</i>      | $2.40 \times 10^{-06}$ | $6.42 \times 10^{-05}$ | -15.2 | Ret proto-oncogene                                                                      |
| 206373_at   | <i>ZIC1</i>     | $1.70 \times 10^{-06}$ | $5.75 \times 10^{-05}$ | -15.1 | ZIC family member 1 (odd-paired homolog, <i>Drosophila</i> )                            |
| 206115_at   | <i>EGR3</i>     | $7.00 \times 10^{-06}$ | 0.000112               | -15.1 | Early growth response 3                                                                 |
| 219127_at   | <i>ATAD4</i>    | $3.80 \times 10^{-06}$ | $7.72 \times 10^{-05}$ | -15.1 | ATPase family, AAA domain containing 4                                                  |
| 202436_s_at | <i>CYP1B1</i>   | $2.32 \times 10^{-05}$ | 0.0002255              | -15.0 | Cytochrome P450, family 1, subfamily B, polypeptide 1                                   |
| 206110_at   | <i>HIST1H3H</i> | $5.30 \times 10^{-06}$ | $9.70 \times 10^{-05}$ | -15.0 | Histone cluster 1, H3H                                                                  |
| 220266_s_at | <i>KLF4</i>     | $6.20 \times 10^{-06}$ | 0.0001064              | -14.9 | Kruppel-like factor 4 (gut)                                                             |
| 202743_at   | <i>PIK3R3</i>   | $2.99 \times 10^{-05}$ | 0.0002526              | -14.9 | Phosphoinositide-3-kinase, regulatory subunit 3 ( $\gamma$ )                            |
| 222108_at   | <i>AMIGO2</i>   | $3.28 \times 10^{-05}$ | 0.000265               | -14.9 | Adhesion molecule with Ig-like domain 2                                                 |
| 210372_s_at | <i>TPD52L1</i>  | $1.70 \times 10^{-06}$ | $5.75 \times 10^{-05}$ | -14.9 | Tumor protein D52-like 1                                                                |
| 209060_x_at | <i>NCOA3</i>    | $1.17 \times 10^{-05}$ | 0.0001512              | -14.8 | Nuclear receptor coactivator 3                                                          |
| 214079_at   | <i>DHRS2</i>    | $3.60 \times 10^{-06}$ | $7.69 \times 10^{-05}$ | -14.5 | Dehydrogenase/reductase (SDR family) member 2                                           |
| 204797_s_at | <i>EML1</i>     | $1.35 \times 10^{-05}$ | 0.0001659              | -14.4 | Echinoderm microtubule associated protein like 1                                        |
| 205709_s_at | <i>CDS1</i>     | $1.30 \times 10^{-06}$ | $5.01 \times 10^{-05}$ | -14.3 | CDP-diacylglycerol synthase (phosphatidate cytidyltransferase) 1                        |
| 202631_s_at | <i>APPBP2</i>   | $5.28 \times 10^{-05}$ | 0.0003408              | -14.3 | Amyloid $\beta$ precursor protein (cytoplasmic tail) binding protein 2                  |

|             |                     |                          |                          |       |                                                                                                      |
|-------------|---------------------|--------------------------|--------------------------|-------|------------------------------------------------------------------------------------------------------|
| 220486_x_at | <i>LOC100130886</i> | 4.73 x 10 <sup>-05</sup> | 0.000322                 | -14.2 | Hypothetical protein LOC100130886                                                                    |
| 219816_s_at | <i>RBM23</i>        | 3.02 x 10 <sup>-05</sup> | 0.000253                 | -14.2 | RNA binding motif protein 23                                                                         |
| 216379_x_at | <i>CD24</i>         | 1.90 x 10 <sup>-06</sup> | 6.07 x 10 <sup>-05</sup> | -14.1 | CD24 molecule                                                                                        |
| 205590_at   | <i>RASGRP1</i>      | 2.98 x 10 <sup>-05</sup> | 0.0002526                | -14.1 | RAS guanyl releasing protein 1 (calcium and DAG-regulated)                                           |
| 57588_at    | <i>SLC24A3</i>      | 3.80 x 10 <sup>-06</sup> | 7.72 x 10 <sup>-05</sup> | -14.0 | Solute carrier family 24 (sodium/potassium/calcium exchanger), member 3                              |
| 210387_at   | <i>HIST1H2BG</i>    | 6.70 x 10 <sup>-06</sup> | 0.0001097                | -14.0 | Histone cluster 1, H2BG                                                                              |
| 204976_s_at | <i>AMMECR1</i>      | .0002584                 | 0.0008226                | -13.9 | Alport syndrome, mental retardation, midface hypoplasia and elliptocytosis chromosomal region gene 1 |
| 219743_at   | <i>HEY2</i>         | 5.90 x 10 <sup>-06</sup> | 0.0001049                | -13.9 | Hairy/enhancer-of-split related with YRPW motif 2                                                    |
| 204952_at   | <i>LYPD3</i>        | 8.60 x 10 <sup>-06</sup> | 0.000127                 | -13.8 | LY6/PLAUR domain containing 3                                                                        |
| 219288_at   | <i>C3orf14</i>      | 1.62 x 10 <sup>-05</sup> | 0.0001832                | -13.6 | Chromosome 3 open reading frame 14                                                                   |
| 220945_x_at | <i>MANSC1</i>       | 2.16 x 10 <sup>-05</sup> | 0.0002163                | -13.6 | MANSC domain containing 1                                                                            |
| 204404_at   | <i>SLC12A2</i>      | 2.00 x 10 <sup>-06</sup> | 6.07 x 10 <sup>-05</sup> | -13.4 | Solute carrier family 12 (sodium/potassium/chloride transporters), member 2                          |
| 218976_at   | <i>DNAJC12</i>      | 2.40 x 10 <sup>-06</sup> | 6.42 x 10 <sup>-05</sup> | -13.3 | DnaJ (Hsp40) homolog, subfamily C, member 12                                                         |
| 212056_at   | <i>KIAA0182</i>     | 6.20 x 10 <sup>-06</sup> | 0.0001064                | -13.2 | Kiaa0182                                                                                             |
| 221081_s_at | <i>DENND2D</i>      | 1.02 x 10 <sup>-05</sup> | 0.0001418                | -13.1 | DENN/MADD domain containing 2D                                                                       |
| 214633_at   | <i>SOX3</i>         | 2.20 x 10 <sup>-06</sup> | 6.26 x 10 <sup>-05</sup> | -13.0 | SRY (sex determining region Y) box 3                                                                 |
| 218195_at   | <i>C6orf211</i>     | .0005249                 | 0.0012835                | -13.0 | Chromosome 6 open reading frame 211                                                                  |
| 209772_s_at | <i>CD24</i>         | 3.40 x 10 <sup>-06</sup> | 7.62 x 10 <sup>-05</sup> | -12.9 | CD24 molecule                                                                                        |
| 205928_at   | <i>ZNF443</i>       | 1.60 x 10 <sup>-06</sup> | 5.65 x 10 <sup>-05</sup> | -12.8 | Zinc finger protein 443                                                                              |
| 217202_s_at | <i>GLUL</i>         | 1.99 x 10 <sup>-05</sup> | 0.000208                 | -12.8 | Glutamate-ammonia ligase (glutamine synthetase)                                                      |
| 204332_s_at | <i>AGA</i>          | 1.70 x 10 <sup>-06</sup> | 5.75 x 10 <sup>-05</sup> | -12.7 | Aspartylglucosaminidase                                                                              |
| 202160_at   | <i>CREBBP</i>       | .0008206                 | 0.0017121                | -12.7 | CREB binding protein                                                                                 |
| 203788_s_at | <i>SEMA3C</i>       | 2.75 x 10 <sup>-05</sup> | 0.0002452                | -12.6 | Sema domain, immunoglobulin domain (Ig), short basic domain, secreted, (semaphorin) 3C               |
| 217983_s_at | <i>RNASET2</i>      | 1.04 x 10 <sup>-05</sup> | 0.0001418                | -12.6 | Ribonuclease T2                                                                                      |
| 220038_at   | <i>SGK3</i>         | .0001013                 | 0.000488                 | -12.5 | Serum/glucocorticoid regulated kinase family, member 3                                               |
| 204595_s_at | <i>STC1</i>         | 2.30 x 10 <sup>-06</sup> | 6.36 x 10 <sup>-05</sup> | -12.4 | Stanniocalcin 1                                                                                      |

|             |                 |                          |                          |       |                                                                     |
|-------------|-----------------|--------------------------|--------------------------|-------|---------------------------------------------------------------------|
| 219388_at   | <i>GRHL2</i>    | 8.83 x 10 <sup>-05</sup> | 0.0004479                | -12.4 | Grainyhead-like 2 ( <i>Drosophila</i> )                             |
| 205326_at   | <i>RAMP3</i>    | .0001049                 | 0.0004981                | -12.3 | Receptor (G protein-coupled) activity modifying protein 3           |
| 203780_at   | <i>MPZL2</i>    | 2.90 x 10 <sup>-06</sup> | 7.07 x 10 <sup>-05</sup> | -12.2 | Myelin protein zero-like 2                                          |
| 208651_x_at | <i>CD24</i>     | 3.20 x 10 <sup>-06</sup> | 7.51 x 10 <sup>-05</sup> | -12.2 | CD24 molecule                                                       |
| 205380_at   | <i>PDZK1</i>    | 2.10 x 10 <sup>-06</sup> | 6.22 x 10 <sup>-05</sup> | -12.1 | PDZ domain containing 1                                             |
| 208180_s_at | <i>HIST1H4H</i> | 2.50 x 10 <sup>-06</sup> | 6.48 x 10 <sup>-05</sup> | -12.1 | Histone cluster 1, H4H                                              |
| 208051_s_at | <i>PAIP1</i>    | .000132                  | 0.0005712                | -12.1 | Poly(A) binding protein interacting protein 1                       |
| 218807_at   | <i>VAV3</i>     | 4.90 x 10 <sup>-05</sup> | 0.0003264                | -12.1 | Vav 3 guanine nucleotide exchange factor                            |
| 211162_x_at | <i>SCD</i>      | 1.86 x 10 <sup>-05</sup> | 0.0001986                | -12.0 | Stearoyl-CoA desaturase (δ-9-desaturase)                            |
| 219734_at   | <i>SIDT1</i>    | 1.19 x 10 <sup>-05</sup> | 0.000153                 | -11.9 | SID1 transmembrane family, member 1                                 |
| 204957_at   | <i>ORC5L</i>    | .0002948                 | 0.0008842                | -11.9 | Origin recognition complex, subunit 5-like (yeast)                  |
| 219015_s_at | <i>ALG13</i>    | 1.23 x 10 <sup>-05</sup> | 0.0001553                | -11.9 | Asparagine-linked glycosylation 13 homolog ( <i>S. cerevisiae</i> ) |
| 204143_s_at | <i>ENOSF1</i>   | 2.80 x 10 <sup>-06</sup> | 6.97 x 10 <sup>-05</sup> | -11.8 | Enolase superfamily member 1                                        |
| 203269_at   | <i>NSMAF</i>    | .0003505                 | 0.0009848                | -11.8 | Neutral sphingomyelinase (N-smase) activation associated factor     |
| 218806_s_at | <i>VAV3</i>     | 3.50 x 10 <sup>-06</sup> | 7.64 x 10 <sup>-05</sup> | -11.8 | Vav 3 guanine nucleotide exchange factor                            |
| 213131_at   | <i>OLFM1</i>    | 2.73 x 10 <sup>-05</sup> | 0.0002452                | -11.7 | Olfactomedin 1                                                      |
| 40560_at    | <i>TBX2</i>     | 9.21 x 10 <sup>-05</sup> | 0.0004597                | -11.7 | T-box 2                                                             |
| 205440_s_at | <i>NPY1R</i>    | 5.82 x 10 <sup>-05</sup> | 0.0003593                | -11.7 | Neuropeptide Y receptor Y1                                          |
| 206059_at   | <i>ZNF91</i>    | 4.84 x 10 <sup>-05</sup> | 0.0003237                | -11.7 | Zinc finger protein 91                                              |
| 212240_s_at | <i>PIK3R1</i>   | 3.40 x 10 <sup>-06</sup> | 7.62 x 10 <sup>-05</sup> | -11.7 | Phosphoinositide-3-kinase, regulatory subunit 1 (α)                 |
| 209488_s_at | <i>RBPMS</i>    | 5.60 x 10 <sup>-06</sup> | 0.0001017                | -11.5 | RNA binding protein with multiple splicing                          |
| 201626_at   | <i>INSIG1</i>   | 5.99 x 10 <sup>-05</sup> | 0.0003657                | -11.5 | Insulin induced gene 1                                              |
| 204014_at   | <i>DUSP4</i>    | 7.50 x 10 <sup>-06</sup> | 0.000117                 | -11.4 | Dual specificity phosphatase 4                                      |
| 209771_x_at | <i>CD24</i>     | 2.70 x 10 <sup>-06</sup> | 6.82 x 10 <sup>-05</sup> | -11.3 | CD24 molecule                                                       |
| 203231_s_at | <i>ATXN1</i>    | .000186                  | 0.0006856                | -11.2 | Ataxin 1                                                            |
| 212726_at   | <i>PHF2</i>     | 2.50 x 10 <sup>-06</sup> | 6.48 x 10 <sup>-05</sup> | -11.2 | PHD finger protein 2                                                |
| 205034_at   | <i>CCNE2</i>    | .0001882                 | 0.0006906                | -11.1 | Cyclin E2                                                           |
| 207847_s_at | <i>MUC1</i>     | 2.90 x 10 <sup>-06</sup> | 7.07 x 10 <sup>-05</sup> | -11.0 | Mucin 1, cell surface associated                                    |

|             |                  |                          |                          |       |                                                                                                                                                      |
|-------------|------------------|--------------------------|--------------------------|-------|------------------------------------------------------------------------------------------------------------------------------------------------------|
| 203543_s_at | <i>KLF9</i>      | 7.00 x 10 <sup>-06</sup> | 0.000112                 | -10.9 | Kruppel-like factor 9                                                                                                                                |
| 208579_x_at | <i>H2BFS</i>     | 6.50 x 10 <sup>-06</sup> | 0.0001089                | -10.9 | H2B histone family, member S                                                                                                                         |
| 212510_at   | <i>GPD1L</i>     | 2.25 x 10 <sup>-05</sup> | 0.0002221                | -10.9 | Glycerol-3-phosphate dehydrogenase 1-like                                                                                                            |
| 209681_at   | <i>SLC19A2</i>   | .0001905                 | 0.0006968                | -10.8 | Solute carrier family 19 (thiamine transporter), member 2                                                                                            |
| 218036_x_at | <i>NMD3</i>      | 3.50 x 10 <sup>-06</sup> | 7.64 x 10 <sup>-05</sup> | -10.8 | NMD3 homolog ( <i>S. cerevisiae</i> )                                                                                                                |
| 208096_s_at | <i>COL21A1</i>   | 4.07 x 10 <sup>-05</sup> | 0.0002965                | -10.8 | Collagen, type XXI, $\alpha$ 1                                                                                                                       |
| 203372_s_at | <i>SOCS2</i>     | 3.20 x 10 <sup>-06</sup> | 7.51 x 10 <sup>-05</sup> | -10.8 | Suppressor of cytokine signaling 2                                                                                                                   |
| 202790_at   | <i>CLDN7</i>     | 1.45 x 10 <sup>-05</sup> | 0.000171                 | -10.8 | Claudin 7                                                                                                                                            |
| 218439_s_at | <i>COMMD10</i>   | 4.45 x 10 <sup>-05</sup> | 0.000312                 | -10.7 | COMM domain containing 10                                                                                                                            |
| 209806_at   | <i>HIST1H2BK</i> | 2.39 x 10 <sup>-05</sup> | 0.0002305                | -10.7 | Histone cluster 1, H2BK                                                                                                                              |
| 221802_s_at | <i>KIAA1598</i>  | .0001262                 | 0.0005572                | -10.6 | Kiaa1598                                                                                                                                             |
| 209699_x_at | <i>AKR1C2</i>    | 3.70 x 10 <sup>-06</sup> | 7.70 x 10 <sup>-05</sup> | -10.5 | Aldo-keto reductase family 1, member C2 (dihydrodiol dehydrogenase 2; bile acid binding protein; 3- $\alpha$ hydroxysteroid dehydrogenase, type III) |
| 204385_at   | <i>KYNU</i>      | 3.10 x 10 <sup>-06</sup> | 7.35 x 10 <sup>-05</sup> | -10.5 | Kynureninase (L-kynurenine hydrolase)                                                                                                                |
| 209590_at   | <i>BMP7</i>      | 1.67 x 10 <sup>-05</sup> | 0.0001855                | -10.5 | Bone morphogenetic protein 7                                                                                                                         |
| 211814_s_at | <i>CCNE2</i>     | 5.06 x 10 <sup>-05</sup> | 0.0003326                | -10.4 | Cyclin E2                                                                                                                                            |
| 218149_s_at | <i>ZNF395</i>    | .0001241                 | 0.0005533                | -10.4 | Zinc finger protein 395                                                                                                                              |
| 213024_at   | <i>TMF1</i>      | .000103                  | 0.0004942                | -10.4 | TATA element modulatory factor 1                                                                                                                     |
| 209291_at   | <i>ID4</i>       | 3.10 x 10 <sup>-06</sup> | 7.35 x 10 <sup>-05</sup> | -10.3 | Inhibitor of DNA binding 4, dominant negative helix-loop-helix protein                                                                               |
| 203038_at   | <i>PTPRK</i>     | .0007959                 | 0.0016828                | -10.2 | Protein tyrosine phosphatase, receptor type, K                                                                                                       |
| 221874_at   | <i>KIAA1324</i>  | 4.30 x 10 <sup>-06</sup> | 8.36 x 10 <sup>-05</sup> | -10.2 | Kiaa1324                                                                                                                                             |
| 218211_s_at | <i>MLPH</i>      | 3.60 x 10 <sup>-06</sup> | 7.69 x 10 <sup>-05</sup> | -10.2 | Melanophilin                                                                                                                                         |
| 219990_at   | <i>E2F8</i>      | .0003187                 | 0.0009256                | -10.2 | E2F transcription factor 8                                                                                                                           |
| 211212_s_at | <i>ORC5L</i>     | 3.80 x 10 <sup>-06</sup> | 7.72 x 10 <sup>-05</sup> | -10.1 | Origin recognition complex, subunit 5-like (yeast)                                                                                                   |
| 220581_at   | <i>C6orf97</i>   | 1.01 x 10 <sup>-05</sup> | 0.0001412                | -10.0 | Chromosome 6 open reading frame 97                                                                                                                   |

\*FDR = false discovery rate; FXYD = FXYD domain-containing ion transport regulator; HSP = heat shock protein; CUB = complement C1r/C1s, sea urchin gene uEGF product (Uegf), bone morphogenetic protein 1 (Bmp1); EGF = epidermal growth factor; GDNF = glial cell line-derived neurotrophic factor; LAG = laminin G; ST6 = sialyltransferase 6; ZIC = zinc finger

protein of the cerebellum; SDR = short chain dehydrogenase/reductase; DAG = dystrophin-associated glycoprotein; LY6/PLAUR = lymphocyte antigen/plasminogen activator, urokinase receptor; MANSC domain= a seven-cysteine-containing domain; DENN/MADD = MAP-kinase activating death domain; CREB = cAMP responsive element binding protein; PDZ = this is a common structural domain of 80-90 amino acids and it is an acronym combining the first letters of three proteins--post synaptic density protein (PSD95), Drosophila disc large tumor suppressor (DlgA), and zonula occludens-1 protein (zo-1); PHD = plant homeodomain; COMM = copper metabolism gene *MURR1*.

† Two-sample *t* test (with random variance model) was used to discriminate between the MCF-7 and MCF-7/ADR cells. Univariate test random variance model parameters were as follows:  $a = 1.68165$ ;  $b = 14.3422$ ; and Kolmogorov–Smirnov statistic = 0.03998. Nominal statistical significance level of each univariate test was .001. All statistical tests were two-sided.
