# Supplementary material
Source: PubMed Central journal article supplement (PMC2970576)
Supplement: supp_djq361_jnci-JNCI-09-1342-s07.pdf [file supp_djq361_jnci-JNCI-09-1342-s07.pdf]

**Supplementary Table 3.** Biological functions of the genes with altered expression in MCF-7/ADR cells as determined by Ingenuity Pathway analysis\*

| Category | Function      | Function annotation† | P‡                     | Gene symbol                                                                                                                                                                                                                                                                                                                                                                                                                                                                                                                                                                                                                                                                                                                                                                                                                                                                                                                                                                                                                                                                                                                                                                                                        | No. of molecules |
|----------|---------------|----------------------|------------------------|--------------------------------------------------------------------------------------------------------------------------------------------------------------------------------------------------------------------------------------------------------------------------------------------------------------------------------------------------------------------------------------------------------------------------------------------------------------------------------------------------------------------------------------------------------------------------------------------------------------------------------------------------------------------------------------------------------------------------------------------------------------------------------------------------------------------------------------------------------------------------------------------------------------------------------------------------------------------------------------------------------------------------------------------------------------------------------------------------------------------------------------------------------------------------------------------------------------------|------------------|
| Cancer   | Neoplasia     | Neoplasia            | $3.95 \times 10^{-26}$ | <p><i>ABAT, ABCB1, ADA, AGR2, AKAP12, AKR1C2, AKT3, ANK3, ANXA1, ANXA9, AREG, AXL, B2M, BEX1, BMP7, BRIP1, BST2, C6ORF211, CA2, CALD1, CCNE2, CD24, CDH1, CDH2, CDKN2A, CEACAM6 (includes EG:4680), CLDN3, CLGN, COL1A1, COL4A1, COL4A2, COL6A1, COL6A2, CREBBP, CRIP1, CTGF, CXCL12, CYP1B1, CYR61, DNAJB4, DNAJC15, ECM1, EGFR, EML1 (includes EG:2009), EMP1, EPCAM, ESR1, EXT1, FABP5, FBN2 (includes EG:2201), FHL2, FN1, FSCN1, FYN, GATA3, GDF15, GFRA1, GJA1, GLUL, GPX1, GPX3, GREB1, GSTP1, HEY2, HIST1H2BD, HIST1H4H (includes EG:8365), HIST2H2AA3, HIST2H2BE, HMGA1, HMGA2, HNMT, ICAM1, ID2, IGF2BP3, IGFBP3, IGFBP5, IL7R, INSIG1, IRS1, ISOC1, KLF4, KRT7, KRT19, LOX, MAFB, MCAM, MGP, MLPH, MMP1 (includes EG:4312), MSLN, MSMB, MSX2, MT1E, MUC1, MYB (includes EG:4602), MYL9 (includes EG:10398), NNMT, NOV, NPY1R, NUA1, OLFM1, PDGFC, PDZK1, PIK3R1, PIK3R3, PPP1R3D, PRAME (includes EG:23532), PSAT1, RB1, RET, RRAS, S100A14, S100P, SCUBE2, SDC2, SEMA3C, SERPINA3, SERPINE1, SERPINE2, SERTAD2, SGK3, SLC12A8, SLC16A3, SLC19A2, SLC24A3, SLC39A6, SOCS2, SPARC, SRPX, STXBP6, TACSTD2, TFAP2C, TFF1, TFF3, TFPI2, TGFB1, TM4SF1, TPD52L1, TUBB2A, VAV3, VIM, WNT5A, WWOX, ZYX</i></p> | 144              |
| Cancer   | Tumorigenesis | Tumorigenesis        | $8.79 \times 10^{-26}$ | <p><i>ABAT, ABCB1, ADA, AGR2, AKAP12, AKR1C2, AKT3, ANK3, ANXA1, ANXA9, AREG, AXL, B2M, BEX1, BMP7, BRIP1, BST2, C6ORF211, CA2, CALD1, CCNE2, CD24, CDH1, CDH2, CDKN2A, CEACAM6 (includes EG:4680), CLDN3, CLGN, COL1A1, COL4A1, COL4A2, COL6A1, COL6A2, CREBBP, CRIP1, CTGF, CXADR, CXCL12, CYP1B1, CYR61, DNAJB4, DNAJC15, ECM1, EGFR, EML1 (includes EG:2009), EMP1, EPCAM, ESR1, EXT1, FABP5, FBN2 (includes EG:2201), FHL2, FN1, FSCN1, FYN, GATA3, GDF15, GFRA1, GJA1, GLUL, GPX1, GPX3, GREB1, GSTP1, HEY2, HIST1H2BD, HIST1H4H (includes EG:8365), HIST2H2AA3, HIST2H2BE, HMGA1, HMGA2, HNMT, ICAM1, ID2, IGF2BP3, IGFBP3, IGFBP5, IL7R, INSIG1, IRS1, ISOC1, KLF4, KRT7, KRT19, LOX, MAFB, MCAM, MGP, MLPH, MMP1 (includes EG:4312), MSLN, MSMB, MSX2, MT1E, MUC1, MYB (includes EG:4602), MYL9 (includes EG:10398), NNMT, NOV, NPY1R, NUA1, OLFM1, PDGFC, PDZK1, PIK3R1, PIK3R3, PPP1R3D, PRAME (includes EG:23532), PSAT1, RB1, RET, RRAS, S100A14, S100P, SCUBE2, SDC2, SEMA3C, SERPINA3, SERPINE1, SERPINE2,</i></p>                                                                                                                                                                                  | 145              |

|        |               |                        |                        |                                                                                                                                                                                                                                                                                                                                                                                                                                                                                                                                                                                                                                                                                                                                                                                                                                                                                                                                                                                                                                                                                                                                                            |     |
|--------|---------------|------------------------|------------------------|------------------------------------------------------------------------------------------------------------------------------------------------------------------------------------------------------------------------------------------------------------------------------------------------------------------------------------------------------------------------------------------------------------------------------------------------------------------------------------------------------------------------------------------------------------------------------------------------------------------------------------------------------------------------------------------------------------------------------------------------------------------------------------------------------------------------------------------------------------------------------------------------------------------------------------------------------------------------------------------------------------------------------------------------------------------------------------------------------------------------------------------------------------|-----|
|        |               |                        |                        | SERTAD2, SGK3, SLC12A8, SLC16A3, SLC19A2, SLC24A3, SLC39A6, SOCS2, SPARC, SRPX, STXBP6, TACSTD2, TFAP2C, TFF1, TFF3, TFPI2, TGFB1, TM4SF1, TPD52L1, TUBB2A, VAV3, VIM, WNT5A, WWOX, ZYX                                                                                                                                                                                                                                                                                                                                                                                                                                                                                                                                                                                                                                                                                                                                                                                                                                                                                                                                                                    |     |
| Cancer | Tumorigenesis | Tumorigenesis of organ | $3.07 \times 10^{-3}$  | AREG, CDKN2A                                                                                                                                                                                                                                                                                                                                                                                                                                                                                                                                                                                                                                                                                                                                                                                                                                                                                                                                                                                                                                                                                                                                               | 2   |
| Cancer | Cancer        | Cancer                 | $2.23 \times 10^{-25}$ | ABAT, ABCB1, ADA, AGR2, AKAP12, AKR1C2, AKT3, ANK3, ANXA1, ANXA9, AREG, AXL, B2M, BEX1, BMP7, BRIP1, BST2, C6ORF211, CA2, CALD1, CD24, CDH1, CDH2, CDKN2A, CEACAM6 (includes EG:4680), CLDN3, CLGN, COL1A1, COL4A1, COL4A2, COL6A1, COL6A2, CREBBP, CRIP1, CTGF, CXCL12, CYP1B1, CYR61, DNAJB4, DNAJC15, ECM1, EGFR, EMP1, EPCAM, ESR1, EXT1, FABP5, FBN2 (includes EG:2201), FHL2, FN1, FSCN1, FYN, GATA3, GDF15, GFRA1, GJA1, GLUL, GPX1, GPX3, GREB1, GSTP1, HEY2, HIST1H2BD, HIST1H4H (includes EG:8365), HIST2H2AA3, HIST2H2BE, HMGA1, HMGA2, HNMT, ICAM1, ID2, IGF2BP3, IGFBP3, IGFBP5, IL7R, INSIG1, IRS1, KLF4, KRT7, KRT19, LOX, MAFB, MCAM, MGP, MLPH, MMP1 (includes EG:4312), MSLN, MSMB, MSX2, MT1E, MUC1, MYB (includes EG:4602), MYL9 (includes EG:10398), NNMT, NPY1R, NUAKE1, OLFM1, PDGFC, PDZK1, PIK3R1, PIK3R3, PPP1R3D, PRAME (includes EG:23532), PSAT1, RB1, RET, RRAS, S100A14, S100P, SCUBE2, SDC2, SEMA3C, SERPINA3, SERPINE1, SERPINE2, SERTAD2, SGK3, SLC12A8, SLC16A3, SLC19A2, SLC24A3, SLC39A6, SOCS2, SPARC, SRPX, STXBP6, TACSTD2, TFAP2C, TFF1, TFF3, TFPI2, TGFB1, TM4SF1, TPD52L1, TUBB2A, VAV3, VIM, WNT5A, WWOX, ZYX | 140 |

|        |                 |                 |                        |                                                                                                                                                                                                                                                                                                                                                                                                                                                                                                                                                                                                                                                                                                                                                                                                                        |     |
|--------|-----------------|-----------------|------------------------|------------------------------------------------------------------------------------------------------------------------------------------------------------------------------------------------------------------------------------------------------------------------------------------------------------------------------------------------------------------------------------------------------------------------------------------------------------------------------------------------------------------------------------------------------------------------------------------------------------------------------------------------------------------------------------------------------------------------------------------------------------------------------------------------------------------------|-----|
| Cancer | Primary tumor   | Primary tumor   | $7.41 \times 10^{-21}$ | ABAT, ABCB1, ADA, AGR2, AKAP12, AKT3, ANXA1, ANXA9, AREG, AXL, B2M, BEX1, BMP7, C6ORF211, CA2, CD24, CDH1, CDH2, CDKN2A, CEACAM6 (includes EG:4680), CLDN3, COL1A1, COL4A1, COL4A2, CREBBP, CTGF, CYP1B1, CYR61, ECM1, EGFR, EPCAM, ESR1, EXT1, FABP5, FBN2 (includes EG:2201), FHL2, FN1, FSCN1, FYN, GATA3, GDF15, GFRA1, GJA1, GPX1, GPX3, GSTP1, HIST2H2AA3, HMGA1, HMGA2, HNMT, ID2, IGFBP3, IGFBP5, INSIG1, ISOC1, KLF4, KRT7, KRT19, LOX, MAFB, MCAM, MGP, MSLN, MSMB, MSX2, MT1E, MUC1, MYL9 (includes EG:10398), NNMT, NOV, NPY1R, OLFM1, PDGFC, PDZK1, PIK3R1, PIK3R3, PPP1R3D, PRAME (includes EG:23532), PSAT1, RB1, RET, RRAS, SCUBE2, SDC2, SEMA3C, SERPINE2, SGK3, SLC19A2, SLC24A3, SLC39A6, SOCS2, SPARC, STXBP6, TFAP2C, TFF1, TFF3, TFPI2, TGFB1, TM4SF1, TUBB2A, VAV3, VIM, WNT5A, WWOX, ZYX       | 105 |
| Cancer | Tumor           | Tumor           | $9.06 \times 10^{-21}$ | ABAT, ABCB1, ADA, AGR2, AKAP12, AKT3, ANXA1, ANXA9, AREG, AXL, B2M, BEX1, BMP7, C6ORF211, CA2, CD24, CDH1, CDH2, CDKN2A, CEACAM6 (includes EG:4680), CLDN3, COL1A1, COL4A1, COL4A2, CREBBP, CTGF, CYP1B1, CYR61, ECM1, EGFR, EPCAM, ESR1, EXT1, FABP5, FBN2 (includes EG:2201), FHL2, FN1, FSCN1, FYN, GATA3, GDF15, GFRA1, GJA1, GPX1, GPX3, GSTP1, HIST2H2AA3, HMGA1, HMGA2, HNMT, ID2, IGFBP3, IGFBP5, IL7R, INSIG1, ISOC1, KLF4, KRT7, KRT19, LOX, MAFB, MCAM, MGP, MSLN, MSMB, MSX2, MT1E, MUC1, MYL9 (includes EG:10398), NNMT, NOV, NPY1R, OLFM1, PDGFC, PDZK1, PIK3R1, PIK3R3, PPP1R3D, PRAME (includes EG:23532), PSAT1, RB1, RET, RRAS, SCUBE2, SDC2, SEMA3C, SERPINE2, SGK3, SLC19A2, SLC24A3, SLC39A6, SOCS2, SPARC, STXBP6, TFAP2C, TFF1, TFF3, TFPI2, TGFB1, TM4SF1, TUBB2A, VAV3, VIM, WNT5A, WWOX, ZYX | 106 |
| Cancer | Malignant tumor | Malignant tumor | $3.21 \times 10^{-20}$ | ABAT, ABCB1, ADA, AGR2, AKAP12, AKT3, ANXA1, ANXA9, AREG, AXL, B2M, BEX1, BMP7, C6ORF211, CA2, CD24, CDH1, CDH2, CDKN2A, CEACAM6 (includes EG:4680), CLDN3, COL1A1, COL4A1, COL4A2, CREBBP, CYP1B1, CYR61, ECM1, EGFR, EPCAM, ESR1, EXT1, FABP5, FBN2 (includes EG:2201), FHL2, FN1, FSCN1, FYN, GATA3, GDF15, GFRA1, GJA1, GPX1, GPX3, GSTP1, HIST2H2AA3, HMGA1, HMGA2, HNMT, ID2, IGFBP3, IGFBP5, INSIG1, KLF4, KRT7, KRT19, LOX, MAFB, MCAM, MGP, MSLN, MSMB, MSX2, MT1E, MUC1, MYL9 (includes EG:10398), NNMT, NPY1R, OLFM1, PDGFC, PDZK1, PIK3R1, PIK3R3, PPP1R3D, PRAME (includes EG:23532), PSAT1, RB1, RET, RRAS, SCUBE2, SDC2, SEMA3C, SERPINE2, SGK3, SLC19A2, SLC24A3, SLC39A6, SOCS2, SPARC, STXBP6, TFAP2C, TFF1, TFF3, TFPI2, TGFB1, TM4SF1, TUBB2A, VAV3, VIM, WNT5A, WWOX, ZYX                         | 102 |

|        |                   |                   |                        |                                                                                                                                                                                                                                                                                                                                                                                                                                                                                                                                                                                                                                               |    |
|--------|-------------------|-------------------|------------------------|-----------------------------------------------------------------------------------------------------------------------------------------------------------------------------------------------------------------------------------------------------------------------------------------------------------------------------------------------------------------------------------------------------------------------------------------------------------------------------------------------------------------------------------------------------------------------------------------------------------------------------------------------|----|
| Cancer | Carcinoma         | Carcinoma         | $4.48 \times 10^{-18}$ | ABAT, ABCB1, AGR2, AKT3, ANXA1, ANXA9, AREG, AXL, B2M, BEX1, BMP7, C6ORF211, CA2, CD24, CDH1, CDH2, CDKN2A, CEACAM6 (includes EG:4680), CLDN3, COL1A1, CREBBP, CYP1B1, CYR61, ECM1, EGFR, EPCAM, ESR1, FABP5, FBN2 (includes EG:2201), FHL2, FN1, FSCN1, FYN, GATA3, GDF15, GFRA1, GJA1, GPX3, GSTP1, HIST2H2AA3, HMGA2, IGFBP3, IGFBP5, INSIG1, KRT7, KRT19, LOX, MAFB, MCAM, MGP, MSLN, MSMB, MSX2, MT1E, MUC1, MYL9 (includes EG:10398), NNMT, NPY1R, PDZK1, PIK3R1, PRAME (includes EG:23532), PSAT1, RB1, RET, RRAS, SCUBE2, SEMA3C, SERPINE2, SLC19A2, SLC39A6, SOCS2, TFF1, TFF3, TFPI2, TGFB1, TM4SF1, TUBB2A, VAV3, VIM, WNT5A, WWOX | 81 |
| Cancer | Ovarian cancer    | Ovarian cancer    | $1.16 \times 10^{-16}$ | ABCB1, ADA, AGR2, AKT3, BMP7, CD24, CDH1, CDKN2A, CEACAM6 (includes EG:4680), CLDN3, COL4A1, EGFR, EPCAM, ESR1, FN1, FYN, GPX3, HIST2H2AA3, HMGA1, HMGA2, IGF2BP3, MCAM, MGP, MMP1 (includes EG:4312), MSLN, MUC1, PRAME (includes EG:23532), PSAT1, RET, RRAS, S100P, SEMA3C, SLC16A3, TACSTD2, TFF3, TFPI2, TUBB2A, VAV3                                                                                                                                                                                                                                                                                                                    | 38 |
| Cancer | Colorectal cancer | Colorectal cancer | $5.18 \times 10^{-15}$ | AKR1C2, AKT3, ANK3, BEX1, BMP7, BST2, CA2, CALD1, CDH2, CDKN2A, CLDN3, CLGN, COL4A1, COL4A2, COL6A1, COL6A2, CRIP1, CTGF, CXCL12, CYP1B1, EGFR, EMP1, EPCAM, FBN2 (includes EG:2201), FN1, FSCN1, FYN, GDF15, GJA1, GLUL, GREB1, HIST1H2BD, HIST1H4H (includes EG:8365), ICAM1, ID2, IGFBP5, INSIG1, IRS1, MAFB, MCAM, MLPH, NUAK1, RET, SERPINA3, SERPINE1, SERTAD2, SLC12A8, SLC16A3, SRPX, STXBP6, TFF3, TM4SF1, TPD52L1, TUBB2A                                                                                                                                                                                                           | 54 |
| Cancer | Breast carcinoma  | Breast carcinoma  | $4.51 \times 10^{-11}$ | ABAT, ABCB1, AGR2, ANXA1, ANXA9, AREG, BEX1, BMP7, C6ORF211, CDH2, CEACAM6 (includes EG:4680), ECM1, EGFR, ESR1, FBN2 (includes EG:2201), FSCN1, GATA3, GFRA1, IGFBP3, MT1E, MUC1, NPY1R, PRAME (includes EG:23532), RB1, SCUBE2, SLC19A2, SLC39A6, TFF1, TUBB2A                                                                                                                                                                                                                                                                                                                                                                              | 29 |
| Cancer | Mammary tumor     | Mammary tumor     | $1.15 \times 10^{-10}$ | ABAT, ABCB1, AGR2, AKT3, ANXA1, ANXA9, AREG, BEX1, BMP7, C6ORF211, CDH2, CEACAM6 (includes EG:4680), ECM1, EGFR, ESR1, FBN2 (includes EG:2201), FSCN1, GATA3, GFRA1, IGFBP3, MT1E, MUC1, NPY1R, PRAME (includes EG:23532), RB1, RET, SCUBE2, SLC19A2, SLC39A6, TFF1, TUBB2A                                                                                                                                                                                                                                                                                                                                                                   | 31 |
| Cancer | Breast cancer     | Breast cancer     | $1.58 \times 10^{-10}$ | ABAT, ABCB1, ADA, AGR2, AKR1C2, AKT3, ANXA1, ANXA9, AREG, BEX1, BMP7, BRIP1, C6ORF211, CDH2, CDKN2A, CEACAM6 (includes EG:4680), CLDN3, CLGN, COL1A1, CYR61, ECM1, EGFR, ESR1, FBN2 (includes EG:2201), FSCN1, FYN, GATA3, GFRA1, HEY2, HIST2H2BE, HMGA1, IGFBP3, KLF4, MT1E, MUC1, NPY1R, PRAME (includes EG:23532), RB1, RET, S100A14, SCUBE2, SGK3, SLC19A2, SLC39A6, SPARC, TACSTD2, TFF1, TGFB1, TUBB2A, WWOX                                                                                                                                                                                                                            | 50 |

|        |                                     |                                     |                       |                                                                                                                                                                                                                                                |    |
|--------|-------------------------------------|-------------------------------------|-----------------------|------------------------------------------------------------------------------------------------------------------------------------------------------------------------------------------------------------------------------------------------|----|
| Cancer | Pancreatic tumor                    | Pancreatic tumor                    | $3.40 \times 10^{-9}$ | <i>AXL, CDKN2A, CREBBP, CYR61, EGFR, FN1, IGFBP3, IGFBP5, KLF4, KRT7, KRT19, MSLN, MSX2, PIK3R1, RET, SERPINE2, TFF1, TUBB2A</i>                                                                                                               | 18 |
| Cancer | Digestive organ tumor               | Digestive organ tumor               | $3.56 \times 10^{-9}$ | <i>ABCB1, AKT3, ANXA1, AXL, CA2, CDH1, CDKN2A, COL1A1, CREBBP, CYR61, EGFR, FN1, FSCN1, FYN, GDF15, GJA1, GSTP1, IGFBP3, IGFBP5, INSIG1, KLF4, KRT7, KRT19, MSLN, MSX2, NNMT, PIK3R1, RB1, RET, SERPINE2, TFF1, TM4SF1, TUBB2A, VIM, WWOX</i>  | 35 |
| Cancer | Genital tumor                       | Genital tumor                       | $1.36 \times 10^{-8}$ | <i>ABAT, ABCB1, ADA, AKT3, CD24, CLDN3, EGFR, EPCAM, ESR1, FHL2, FYN, GATA3, GDF15, GPX3, HIST2H2AA3, HMGA2, IGFBP3, KRT7, MCAM, MGP, MSLN, MSMB, MUC1, MYL9 (includes EG:10398), PSAT1, RB1, RET, RRAS, SEMA3C, TFF3, TFPI2, TUBB2A, VAV3</i> | 33 |
| Cancer | Pancreatic cancer                   | Pancreatic cancer                   | $6.91 \times 10^{-8}$ | <i>AXL, CDH2, CDKN2A, CREBBP, CYR61, EGFR, FBN2 (includes EG:2201), FN1, FYN, IGFBP3, IGFBP5, KLF4, KRT7, KRT19, MSLN, MSX2, PIK3R1, RET, SERPINE2, TFF1, TUBB2A</i>                                                                           | 21 |
| Cancer | Gonadal tumor                       | Gonadal tumor                       | $7.95 \times 10^{-7}$ | <i>ABCB1, ADA, CD24, CLDN3, EGFR, EPCAM, GPX3, HIST2H2AA3, HMGA2, MCAM, MGP, MSLN, MUC1, RET, RRAS, SEMA3C, TFPI2, TUBB2A, VAV3</i>                                                                                                            | 19 |
| Cancer | Ovarian tumor                       | Ovarian tumor                       | $1.73 \times 10^{-6}$ | <i>ABCB1, CD24, CLDN3, EGFR, EPCAM, GPX3, HIST2H2AA3, HMGA2, MCAM, MGP, MSLN, MUC1, RET, RRAS, SEMA3C, TFPI2, TUBB2A, VAV3</i>                                                                                                                 | 18 |
| Cancer | Non-small cell lung cancer          | Non-small cell lung cancer          | $2.45 \times 10^{-6}$ | <i>AKT3, B2M, CDH1, CDKN2A, DNAJB4, EGFR, EPCAM, FN1, FYN, MAFB, MSLN, RB1, RET, S100P, TUBB2A</i>                                                                                                                                             | 15 |
| Cancer | Prostate cancer                     | Prostate cancer                     | $6.19 \times 10^{-6}$ | <i>ABAT, AKT3, CDH1, COL1A1, CYP1B1, DNAJC15, EGFR, EPCAM, ESR1, FHL2, FYN, GATA3, GDF15, GPX3, IGFBP3, IL7R, KRT7, MMP1 (includes EG:4312), MSMB, MUC1, MYL9 (includes EG:10398), PSAT1, RB1, RET, TFF3, TUBB2A, WWOX</i>                     | 27 |
| Cancer | Clear-cell ovarian carcinoma        | Clear-cell ovarian carcinoma        | $7.74 \times 10^{-6}$ | <i>CLDN3, EPCAM, GPX3, HMGA2, MGP, MUC1</i>                                                                                                                                                                                                    | 6  |
| Cancer | Colon cancer                        | Colon cancer                        | $8.99 \times 10^{-6}$ | <i>AKT3, BMP7, BST2, CA2, CALD1, CLDN3, COL6A1, COL6A2, CRIP1, EGFR, FN1, FSCN1, GDF15, GJA1, HIST1H2BD, HIST1H4H (includes EG:8365), INSIG1, MCAM, SERPINA3, SERPINE1, STXBP6, TFF3, TPD52L1, TUBB2A</i>                                      | 24 |
| Cancer | Carcinoma in situ                   | Carcinoma in situ                   | $1.60 \times 10^{-5}$ | <i>FHL2, GATA3, GPX3, HMGA2, IGFBP3, KRT7, MUC1, MYL9 (includes EG:10398), PSAT1, TFF3</i>                                                                                                                                                     | 10 |
| Cancer | Prostatic intraepithelial neoplasia | Prostatic intraepithelial neoplasia | $2.72 \times 10^{-5}$ | <i>ESR1, FHL2, GATA3, GPX3, IGFBP3, KRT7, MUC1, MYL9 (includes EG:10398), PSAT1, TFF3</i>                                                                                                                                                      | 10 |
| Cancer | Uterine tumor                       | Uterine tumor                       | $3.42 \times 10^{-5}$ | <i>CD24, CDH1, CDH2, CYP1B1, CYR61, EGFR, ESR1, HMGA1, HNMT, IGFBP5, OLFM1, PIK3R3, PPP1R3D, RB1, RET, SLC24A3, STXBP6, TFAP2C, TGFB1, TUBB2A, ZYX</i>                                                                                         | 21 |

|        |                                 |                                 |                       |                                                                                                                                                        |    |
|--------|---------------------------------|---------------------------------|-----------------------|--------------------------------------------------------------------------------------------------------------------------------------------------------|----|
| Cancer | Pancreatic adenocarcinoma       | Pancreatic adenocarcinoma       | $3.67 \times 10^{-5}$ | <i>AXL, CYR61, IGFBP3, KRT7, KRT19, MSLN, SERPINE2</i>                                                                                                 | 7  |
| Cancer | Head and neck tumor             | Head and neck tumor             | $3.69 \times 10^{-5}$ | <i>ABAT, AKT3, ANXA1, CDKN2A, CREBBP, EGFR, EPCAM, ESR1, FABP5, FN1, FYN, ID2, IGFBP5, INSIG1, PDGFC, PIK3R1, RB1, RET, TGFB1, TUBB2A</i>              | 20 |
| Cancer | Non-small-cell lung carcinoma   | Non-small-cell lung carcinoma   | $4.92 \times 10^{-5}$ | <i>AKT3, B2M, CDKN2A, EGFR, EPCAM, FN1, FYN, MAFB, MSLN, RB1, RET, TUBB2A</i>                                                                          | 12 |
| Cancer | Prostatic carcinoma             | Prostatic carcinoma             | $5.27 \times 10^{-5}$ | <i>ABAT, AKT3, EGFR, EPCAM, ESR1, FHL2, FYN, GATA3, GDF15, GPX3, IGFBP3, KRT7, MSMB, MUC1, MYL9 (includes EG:10398), PSAT1, RB1, RET, TFF3, TUBB2A</i> | 20 |
| Cancer | Oral cancer                     | Oral cancer                     | $6.50 \times 10^{-5}$ | <i>CDKN2A, CREBBP, EGFR, FN1, IGFBP5, INSIG1, PIK3R1, RET</i>                                                                                          | 8  |
| Cancer | Prostatic intraepithelial tumor | Prostatic intraepithelial tumor | $8.92 \times 10^{-5}$ | <i>FHL2, GATA3, GPX3, IGFBP3, KRT7, MUC1, MYL9 (includes EG:10398), PSAT1, TFF3</i>                                                                    | 9  |
| Cancer | Serous ovarian carcinoma        | Serous ovarian carcinoma        | $9.31 \times 10^{-5}$ | <i>CD24, CLDN3, EPCAM, GPX3, HIST2H2AA3, MCAM, MGP, RRAS, SEMA3C, TFPI2, VAV3</i>                                                                      | 11 |
| Cancer | Lung carcinoma                  | Lung carcinoma                  | $9.52 \times 10^{-5}$ | <i>ABCB1, AKT3, B2M, CDKN2A, CLDN3, EGFR, EPCAM, FN1, FYN, LOX, MAFB, MSLN, RB1, RET, TUBB2A</i>                                                       | 15 |
| Cancer | Leiomyoma                       | Leiomyoma                       | $9.97 \times 10^{-5}$ | <i>CD24, CTGF, CYP1B1, CYR61, EGFR, ESR1, HNMT, IGFBP5, ISOC1, NOV, OLFM1, PIK3R3, PPP1R3D, SLC24A3, STXBP6, TFAP2C, TGFB1, ZYX</i>                    | 18 |
| Cancer | Endometrioid carcinoma          | Endometrioid carcinoma          | $1.19 \times 10^{-4}$ | <i>CLDN3, EPCAM, GPX3, HMGA2, MGP</i>                                                                                                                  | 5  |
| Cancer | Neuroendocrine tumor            | Neuroendocrine tumor            | $1.25 \times 10^{-4}$ | <i>AXL, CYR61, EGFR, IGFBP3, KRT7, KRT19, MSLN, MSX2, RET, SERPINE2, TUBB2A</i>                                                                        | 11 |
| Cancer | Benign tumor                    | Benign tumor                    | $2.26 \times 10^{-4}$ | <i>CD24, CTGF, CYP1B1, CYR61, EGFR, ESR1, FYN, GSTP1, HNMT, IGFBP5, ISOC1, NOV, OLFM1, PIK3R3, PPP1R3D, RET, SLC24A3, STXBP6, TFAP2C, TGFB1, ZYX</i>   | 21 |
| Cancer | Peripheral T-cell lymphoma      | Peripheral T-cell lymphoma      | $2.76 \times 10^{-4}$ | <i>COL4A1, COL4A2, CYR61, FN1, NNMT</i>                                                                                                                | 5  |
| Cancer | Endocrine gland tumor           | Endocrine gland tumor           | $3.03 \times 10^{-4}$ | <i>ABCB1, AXL, CYR61, EGFR, IGFBP3, KRT7, KRT19, MSLN, MSX2, RET, SERPINE2, TGFB1, TUBB2A</i>                                                          | 13 |
| Cancer | Neuroendocrine carcinoma        | Neuroendocrine carcinoma        | $3.62 \times 10^{-4}$ | <i>AXL, CYR61, EGFR, IGFBP3, KRT7, KRT19, MSLN, MSX2, SERPINE2</i>                                                                                     | 9  |
| Cancer | Pancreatic carcinoma            | Pancreatic carcinoma            | $4.17 \times 10^{-4}$ | <i>AXL, CYR61, IGFBP3, KRT7, KRT19, MSLN, MSX2, SERPINE2</i>                                                                                           | 8  |
| Cancer | Lung cancer                     | Lung cancer                     | $8.27 \times 10^{-4}$ | <i>ABCB1, AKT3, B2M, CDH1, CDKN2A, CLDN3, DNAJB4, EGFR, EPCAM, FN1, FYN, LOX, MAFB, MSLN, RB1, RET, S100P, TUBB2A</i>                                  | 18 |

|        |                                  |                                  |                       |                                                                                             |    |
|--------|----------------------------------|----------------------------------|-----------------------|---------------------------------------------------------------------------------------------|----|
| Cancer | Adenocarcinoma                   | Adenocarcinoma                   | $1.12 \times 10^{-3}$ | <i>ANXA1, CDH1, CLDN3, EGFR, ESR1, GJA1, GSTP1, LOX, RET, SERPINE2, TM4SF1, TUBB2A, VIM</i> | 13 |
| Cancer | Sarcoma                          | Sarcoma                          | $1.15 \times 10^{-3}$ | <i>ABCB1, CDH1, CDKN2A, EGFR, EXT1, FYN, HMGA1, RB1, RET, SDC2, SPARC, TUBB2A</i>           | 12 |
| Cancer | Acinar-cell carcinoma            | Acinar-cell carcinoma            | $1.21 \times 10^{-3}$ | <i>CREBBP, FN1, IGFBP5, PIK3R1</i>                                                          | 4  |
| Cancer | Esophageal carcinoma             | Esophageal carcinoma             | $1.21 \times 10^{-3}$ | <i>EGFR, GSTP1, RB1, WWOX</i>                                                               | 4  |
| Cancer | Serous ovarian carcinoma process | Serous ovarian carcinoma process | $1.28 \times 10^{-3}$ | <i>CLDN3, MSLN, MUC1</i>                                                                    | 3  |
| Cancer | Lymphoma                         | Lymphoma                         | $1.57 \times 10^{-3}$ | <i>ABCB1, ADA, AKT3, CDKN2A, COL4A1, COL4A2, CYR61, FN1, FYN, ID2, NNMT, RET, TUBB2A</i>    | 13 |
| Cancer | Osteosarcoma                     | Osteosarcoma                     | $1.68 \times 10^{-3}$ | <i>CDKN2A, FYN, RB1, SDC2, SPARC</i>                                                        | 5  |
| Cancer | Neuroepithelial tumor            | Neuroepithelial tumor            | $1.91 \times 10^{-3}$ | <i>AKAP12, AKT3, CDKN2A, EGFR, ESR1, ID2, PDGFC, RB1, RET</i>                               | 9  |
| Cancer | Hyperproliferation               | Hyperproliferation               | $1.92 \times 10^{-3}$ | <i>AREG, CDH1, EGFR, ESR1, MMP1 (includes EG:4312), RET</i>                                 | 6  |
| Cancer | Salivary gland tumor             | Salivary gland tumor             | $1.92 \times 10^{-3}$ | <i>CREBBP, FN1, IGFBP5, INSIG1, PIK3R1, RET</i>                                             | 6  |
| Cancer | Papillary thyroid carcinoma      | Papillary thyroid carcinoma      | $2.10 \times 10^{-3}$ | <i>EGFR, FN1, RET, TFF3, VIM, WNT5A</i>                                                     | 6  |
| Cancer | Bone tumor                       | Bone tumor                       | $2.42 \times 10^{-3}$ | <i>ADA, CDKN2A, EXT1, FYN, RB1, RET, SDC2, SPARC</i>                                        | 8  |
| Cancer | Ductal carcinoma                 | Ductal carcinoma                 | $2.59 \times 10^{-3}$ | <i>ABAT, ANXA1, ANXA9, CDH2, ECM1, FBN2 (includes EG:2201), MT1E</i>                        | 7  |
| Cancer | Glioma                           | Glioma                           | $2.74 \times 10^{-3}$ | <i>AKT3, CDKN2A, EGFR, ESR1, ID2, PDGFC, RB1, RET</i>                                       | 8  |
| Cancer | Mucoepidermoid carcinoma         | Mucoepidermoid carcinoma         | $2.94 \times 10^{-3}$ | <i>CREBBP, FN1, IGFBP5, INSIG1, PIK3R1</i>                                                  | 5  |
| Cancer | T-cell non-Hodgkin lymphoma      | T-cell non-Hodgkin lymphoma      | $2.95 \times 10^{-3}$ | <i>AKT3, COL4A1, COL4A2, CYR61, FN1, NNMT</i>                                               | 6  |
| Cancer | Ductal carcinoma in situ         | Ductal carcinoma in situ         | $3.07 \times 10^{-3}$ | <i>ANXA1, ESR1</i>                                                                          | 2  |
| Cancer | Malignancy                       | Malignancy of tumor              | $3.07 \times 10^{-3}$ | <i>EGFR, ID2</i>                                                                            | 2  |
| Cancer | Brain tumor                      | Brain tumor                      | $3.08 \times 10^{-3}$ | <i>ABAT, AKT3, CDKN2A, EGFR, ESR1, FYN, ID2, PDGFC, RB1, RET, TGFB1, TUBB2A</i>             | 12 |
| Cancer | Astrocytoma                      | Astrocytoma                      | $3.20 \times 10^{-3}$ | <i>AKT3, EGFR, ESR1, ID2, PDGFC, RET</i>                                                    | 6  |

|        |                            |                                             |                       |                                                                                              |    |
|--------|----------------------------|---------------------------------------------|-----------------------|----------------------------------------------------------------------------------------------|----|
| Cancer | Ovarian carcinoma          | Ovarian carcinoma                           | $3.20 \times 10^{-3}$ | <i>ABCB1, EGFR, EPCAM, HMGA2, MSLN, TUBB2A</i>                                               | 6  |
| Cancer | Lymphatic node tumor       | Lymphatic node tumor                        | $4.48 \times 10^{-3}$ | <i>AKT3, CDKN2A, COL4A1, COL4A2, CYR61, FN1, FYN, ID2, NNMT, TUBB2A</i>                      | 10 |
| Cancer | Glioblastoma               | Glioblastoma                                | $4.76 \times 10^{-3}$ | <i>AKT3, EGFR, ESR1, PDGFC, RET</i>                                                          | 5  |
| Cancer | Prolactinoma               | Prolactinoma                                | $5.04 \times 10^{-3}$ | <i>EGFR, ESR1</i>                                                                            | 2  |
| Cancer | Esophageal cancer          | Esophageal cancer                           | $5.28 \times 10^{-3}$ | <i>ADA, EGFR, GSTP1, RB1, RET, TUBB2A, WWOX</i>                                              | 7  |
| Cancer | Transformation             | Transformation                              | $5.77 \times 10^{-3}$ | <i>AXL, CDH1, EGFR, ESR1, IRS1, NRCAM, PIK3R1, RASIP1, RET, TFF3</i>                         | 10 |
| Cancer | Transformation             | Transformation of cells                     | $1.47 \times 10^{-2}$ | <i>AXL, EGFR, ESR1, IRS1, NRCAM, PIK3R1, RASIP1, RET, TFF3</i>                               | 9  |
| Cancer | Transformation             | Transformation of eukaryotic cells          | $1.57 \times 10^{-2}$ | <i>AXL, EGFR, ESR1, IRS1, NRCAM, PIK3R1, RASIP1, TFF3</i>                                    | 8  |
| Cancer | Mucinous ovarian carcinoma | Mucinous ovarian carcinoma                  | $6.46 \times 10^{-3}$ | <i>EPCAM, GPX3, MGP</i>                                                                      | 3  |
| Cancer | Cholangiocarcinoma         | Cholangiocarcinoma                          | $6.65 \times 10^{-3}$ | <i>ANXA1, EGFR, TM4SF1, VIM</i>                                                              | 4  |
| Cancer | Cervical carcinoma         | Cervical carcinoma                          | $7.27 \times 10^{-3}$ | <i>CDH1, CDH2, RB1, TGFB1, TUBB2A</i>                                                        | 5  |
| Cancer | Squamous cell tumor        | Squamous cell tumor                         | $7.32 \times 10^{-3}$ | <i>CDKN2A, EGFR, FYN, GPX1, GSTP1, HMGA2, PDZK1, SOCS2, TUBB2A, WWOX</i>                     | 10 |
| Cancer | Leiomyosarcoma             | Leiomyosarcoma                              | $7.40 \times 10^{-3}$ | <i>CDKN2A, FYN, HMGA1, RET</i>                                                               | 4  |
| Cancer | Uterine leiomyoma          | Uterine leiomyoma                           | $8.33 \times 10^{-3}$ | <i>CD24, CYR61, EGFR, HNMT, IGFBP5, OLFM1, PIK3R3, PPP1R3D, SLC24A3, STXBP6, TFAP2C, ZYX</i> | 12 |
| Cancer | Colorectal tumor           | Colorectal tumor                            | $9.49 \times 10^{-3}$ | <i>AKT3, EGFR, FSCN1, GDF15, GJA1, INSIG1, RET, TUBB2A</i>                                   | 8  |
| Cancer | Renal cancer               | Renal cancer                                | $9.69 \times 10^{-3}$ | <i>ABCB1, CDH1, EGFR, EPCAM, FN1, IL7R, RB1, RET, TUBB2A</i>                                 | 9  |
| Cancer | Chemotherapy resistance    | Chemotherapy resistance of tumor cell lines | $1.03 \times 10^{-2}$ | <i>AXL, EGFR</i>                                                                             | 2  |
| Cancer | Myosarcoma                 | Myosarcoma                                  | $1.06 \times 10^{-2}$ | <i>CDKN2A, FYN, HMGA1, RET, TUBB2A</i>                                                       | 5  |
| Cancer | Non-hodgkin lymphoma       | Non-hodgkin lymphoma                        | $1.13 \times 10^{-2}$ | <i>AKT3, CDKN2A, COL4A1, COL4A2, CYR61, FN1, FYN, NNMT, TUBB2A</i>                           | 9  |
| Cancer | Cervical cancer            | Cervical cancer                             | $1.18 \times 10^{-2}$ | <i>CDH1, CDH2, EGFR, RB1, RET, TGFB1, TUBB2A</i>                                             | 7  |
| Cancer | Metastasis                 | Metastasis                                  | $1.21 \times 10^{-2}$ | <i>ABCB1, CYP1B1, EGFR, FYN, TUBB2A, VIM</i>                                                 | 6  |
| Cancer | Chondrosarcoma             | Chondrosarcoma                              | $1.35 \times 10^{-2}$ | <i>EXT1, FYN</i>                                                                             | 2  |

|                             |                              |                              |                        |                                                                                                                                                                                                                                                                                                                                                                                                                           |    |
|-----------------------------|------------------------------|------------------------------|------------------------|---------------------------------------------------------------------------------------------------------------------------------------------------------------------------------------------------------------------------------------------------------------------------------------------------------------------------------------------------------------------------------------------------------------------------|----|
| Cancer                      | Renal-cell carcinoma         | Renal-cell carcinoma         | $1.35 \times 10^{-2}$  | <i>ABCB1, CDH1, EGFR, FN1, RB1, RET, TUBB2A</i>                                                                                                                                                                                                                                                                                                                                                                           | 7  |
| Cancer                      | Squamous-cell carcinoma      | Squamous-cell carcinoma      | $1.63 \times 10^{-2}$  | <i>CDKN2A, EGFR, FYN, GSTP1, HMGA2, PDZK1, SOCS2, TUBB2A, WWOX</i>                                                                                                                                                                                                                                                                                                                                                        | 9  |
| Reproductive system disease | Ovarian cancer               | Ovarian cancer               | $1.16 \times 10^{-16}$ | <i>ABCB1, ADA, AGR2, AKT3, BMP7, CD24, CDH1, CDKN2A, CEACAM6 (includes EG:4680), CLDN3, COL4A1, EGFR, EPCAM, ESR1, FN1, FYN, GPX3, HIST2H2AA3, HMGA1, HMGA2, IGF2BP3, MCAM, MGP, MMP1 (includes EG:4312), MSLN, MUC1, PRAME (includes EG:23532), PSAT1, RET, RRAS, S100P, SEMA3C, SLC16A3, TACSTD2, TFF3, TFPI2, TUBB2A, VAV3</i>                                                                                         | 38 |
| Reproductive system disease | Breast carcinoma             | Breast carcinoma             | $4.51 \times 10^{-11}$ | <i>ABAT, ABCB1, AGR2, ANXA1, ANXA9, AREG, BEX1, BMP7, C6ORF211, CDH2, CEACAM6 (includes EG:4680), ECM1, EGFR, ESR1, FBN2 (includes EG:2201), FSCN1, GATA3, GFRA1, IGFBP3, MT1E, MUC1, NPY1R, PRAME (includes EG:23532), RB1, SCUBE2, SLC19A2, SLC39A6, TFF1, TUBB2A</i>                                                                                                                                                   | 29 |
| Reproductive system disease | Mammary tumor                | Mammary tumor                | $1.15 \times 10^{-10}$ | <i>ABAT, ABCB1, AGR2, AKT3, ANXA1, ANXA9, AREG, BEX1, BMP7, C6ORF211, CDH2, CEACAM6 (includes EG:4680), ECM1, EGFR, ESR1, FBN2 (includes EG:2201), FSCN1, GATA3, GFRA1, IGFBP3, MT1E, MUC1, NPY1R, PRAME (includes EG:23532), RB1, RET, SCUBE2, SLC19A2, SLC39A6, TFF1, TUBB2A</i>                                                                                                                                        | 31 |
| Reproductive system disease | Breast cancer                | Breast cancer                | $1.58 \times 10^{-10}$ | <i>ABAT, ABCB1, ADA, AGR2, AKR1C2, AKT3, ANXA1, ANXA9, AREG, BEX1, BMP7, BRIP1, C6ORF211, CDH2, CDKN2A, CEACAM6 (includes EG:4680), CLDN3, CLGN, COL1A1, CYR61, ECM1, EGFR, ESR1, FBN2 (includes EG:2201), FSCN1, FYN, GATA3, GFRA1, HEY2, HIST2H2BE, HMGA1, IGFBP3, KLF4, MT1E, MUC1, NPY1R, PRAME (includes EG:23532), RB1, RET, S100A14, SCUBE2, SGK3, SLC19A2, SLC39A6, SPARC, TACSTD2, TFF1, TGFB1, TUBB2A, WWOX</i> | 50 |
| Reproductive system disease | Genital tumor                | Genital tumor                | $1.36 \times 10^{-8}$  | <i>ABAT, ABCB1, ADA, AKT3, CD24, CLDN3, EGFR, EPCAM, ESR1, FHL2, FYN, GATA3, GDF15, GPX3, HIST2H2AA3, HMGA2, IGFBP3, KRT7, MCAM, MGP, MSLN, MSMB, MUC1, MYL9 (includes EG:10398), PSAT1, RB1, RET, RRAS, SEMA3C, TFF3, TFPI2, TUBB2A, VAV3</i>                                                                                                                                                                            | 33 |
| Reproductive system disease | Endometriosis                | Endometriosis                | $4.03 \times 10^{-8}$  | <i>ANK3, BCAT1, CCR10, COL6A1, COL6A2, CTGF, CXADR, CYR61, EGFR, ESR1, FN1, GATA3, GPX3, GSTP1, HMGA2, ICAM1, IL18, MMP1 (includes EG:4312), MPPED2 (includes EG:744), MT1E, MUC1, OLFM1, PIK3R1, SDC2, SLC16A1, STC1, TGFB1, TGFBI, UCHL1, VIM</i>                                                                                                                                                                       | 30 |
| Reproductive system disease | Reproductive system disorder | Reproductive system disorder | $6.95 \times 10^{-8}$  | <i>ANK3, BCAT1, CCR10, COL6A1, COL6A2, CRIP1, CTGF, CXADR, CYR61, EGFR, EML1 (includes EG:2009), ESR1, FN1, GATA3, GPX1, GPX3, GSTP1, HMGA2, ICAM1, IL18, MMP1 (includes EG:4312), MPPED2 (includes EG:744), MT1E, MUC1, OLFM1, OXTR, PIK3R1, SDC2, SLC16A1, STC1, STXBP6, TGFB1, TGFBI, UCHL1, VIM, XIST</i>                                                                                                             | 36 |

|                             |                                     |                                     |                       |                                                                                                                                                                                                                            |    |
|-----------------------------|-------------------------------------|-------------------------------------|-----------------------|----------------------------------------------------------------------------------------------------------------------------------------------------------------------------------------------------------------------------|----|
| Reproductive system disease | Gonadal tumor                       | Gonadal tumor                       | $7.95 \times 10^{-7}$ | <i>ABCB1, ADA, CD24, CLDN3, EGFR, EPCAM, GPX3, HIST2H2AA3, HMGA2, MCAM, MGP, MSLN, MUC1, RET, RRAS, SEMA3C, TFPI2, TUBB2A, VAV3</i>                                                                                        | 19 |
| Reproductive system disease | Ovarian tumor                       | Ovarian tumor                       | $1.73 \times 10^{-6}$ | <i>ABCB1, CD24, CLDN3, EGFR, EPCAM, GPX3, HIST2H2AA3, HMGA2, MCAM, MGP, MSLN, MUC1, RET, RRAS, SEMA3C, TFPI2, TUBB2A, VAV3</i>                                                                                             | 18 |
| Reproductive system disease | Prostate cancer                     | Prostate cancer                     | $6.19 \times 10^{-6}$ | <i>ABAT, AKT3, CDH1, COL1A1, CYP1B1, DNAJC15, EGFR, EPCAM, ESR1, FHL2, FYN, GATA3, GDF15, GPX3, IGFBP3, IL7R, KRT7, MMP1 (includes EG:4312), MSMB, MUC1, MYL9 (includes EG:10398), PSAT1, RB1, RET, TFF3, TUBB2A, WWOX</i> | 27 |
| Reproductive system disease | Clear-cell ovarian carcinoma        | Clear-cell ovarian carcinoma        | $7.74 \times 10^{-6}$ | <i>CLDN3, EPCAM, GPX3, HMGA2, MGP, MUC1</i>                                                                                                                                                                                | 6  |
| Reproductive system disease | Prostatic intraepithelial neoplasia | Prostatic intraepithelial neoplasia | $2.72 \times 10^{-5}$ | <i>ESR1, FHL2, GATA3, GPX3, IGFBP3, KRT7, MUC1, MYL9 (includes EG:10398), PSAT1, TFF3</i>                                                                                                                                  | 10 |
| Reproductive system disease | Uterine tumor                       | Uterine tumor                       | $3.42 \times 10^{-5}$ | <i>CD24, CDH1, CDH2, CYP1B1, CYR61, EGFR, ESR1, HMGA1, HNMT, IGFBP5, OLFM1, PIK3R3, PPP1R3D, RB1, RET, SLC24A3, STXBP6, TFAP2C, TGFB1, TUBB2A, ZYX</i>                                                                     | 21 |
| Reproductive system disease | Prostatic carcinoma                 | Prostatic carcinoma                 | $5.27 \times 10^{-5}$ | <i>ABAT, AKT3, EGFR, EPCAM, ESR1, FHL2, FYN, GATA3, GDF15, GPX3, IGFBP3, KRT7, MSMB, MUC1, MYL9 (includes EG:10398), PSAT1, RB1, RET, TFF3, TUBB2A</i>                                                                     | 20 |
| Reproductive system disease | Prostatic intraepithelial tumor     | Prostatic intraepithelial tumor     | $8.92 \times 10^{-5}$ | <i>FHL2, GATA3, GPX3, IGFBP3, KRT7, MUC1, MYL9 (includes EG:10398), PSAT1, TFF3</i>                                                                                                                                        | 9  |
| Reproductive system disease | Serous ovarian carcinoma            | Serous ovarian carcinoma            | $9.31 \times 10^{-5}$ | <i>CD24, CLDN3, EPCAM, GPX3, HIST2H2AA3, MCAM, MGP, RRAS, SEMA3C, TFPI2, VAV3</i>                                                                                                                                          | 11 |
| Reproductive system disease | Endometrioid carcinoma              | Endometrioid carcinoma              | $1.19 \times 10^{-4}$ | <i>CLDN3, EPCAM, GPX3, HMGA2, MGP</i>                                                                                                                                                                                      | 5  |
| Reproductive system disease | Serous ovarian carcinoma process    | Serous ovarian carcinoma process    | $1.28 \times 10^{-3}$ | <i>CLDN3, MSLN, MUC1</i>                                                                                                                                                                                                   | 3  |
| Reproductive system disease | Ductal carcinoma                    | Ductal carcinoma                    | $2.59 \times 10^{-3}$ | <i>ABAT, ANXA1, ANXA9, CDH2, ECM1, FBN2 (includes EG:2201), MT1E</i>                                                                                                                                                       | 7  |
| Reproductive system disease | Ductal carcinoma in situ            | Ductal carcinoma in situ            | $3.07 \times 10^{-3}$ | <i>ANXA1, ESR1</i>                                                                                                                                                                                                         | 2  |

|                                   |                            |                                   |                        |                                                                                                                                                                                                                                                                                                                                                                                                                                                                                                                                                                                            |    |
|-----------------------------------|----------------------------|-----------------------------------|------------------------|--------------------------------------------------------------------------------------------------------------------------------------------------------------------------------------------------------------------------------------------------------------------------------------------------------------------------------------------------------------------------------------------------------------------------------------------------------------------------------------------------------------------------------------------------------------------------------------------|----|
| Reproductive system disease       | Ovarian carcinoma          | Ovarian carcinoma                 | $3.20 \times 10^{-3}$  | <i>ABCB1, EGFR, EPCAM, HMGA2, MSLN, TUBB2A</i>                                                                                                                                                                                                                                                                                                                                                                                                                                                                                                                                             | 6  |
| Reproductive system disease       | Mucinous ovarian carcinoma | Mucinous ovarian carcinoma        | $6.46 \times 10^{-3}$  | <i>EPCAM, GPX3, MGP</i>                                                                                                                                                                                                                                                                                                                                                                                                                                                                                                                                                                    | 3  |
| Reproductive system disease       | Cervical carcinoma         | Cervical carcinoma                | $7.27 \times 10^{-3}$  | <i>CDH1, CDH2, RB1, TGFB1, TUBB2A</i>                                                                                                                                                                                                                                                                                                                                                                                                                                                                                                                                                      | 5  |
| Reproductive system disease       | Uterine leiomyoma          | Uterine leiomyoma                 | $8.33 \times 10^{-3}$  | <i>CD24, CYR61, EGFR, HNMT, IGFBP5, OLFM1, PIK3R3, PPP1R3D, SLC24A3, STXBP6, TFAP2C, ZYX</i>                                                                                                                                                                                                                                                                                                                                                                                                                                                                                               | 12 |
| Reproductive system disease       | Adenomyosis                | Adenomyosis                       | $9.16 \times 10^{-3}$  | <i>CRIP1, ESR1, GPX1, STXBP6, XIST</i>                                                                                                                                                                                                                                                                                                                                                                                                                                                                                                                                                     | 5  |
| Reproductive system disease       | Cervical cancer            | Cervical cancer                   | $1.18 \times 10^{-2}$  | <i>CDH1, CDH2, EGFR, RB1, RET, TGFB1, TUBB2A</i>                                                                                                                                                                                                                                                                                                                                                                                                                                                                                                                                           | 7  |
| Cellular growth and proliferation | Proliferation              | Proliferation of cells            | $1.38 \times 10^{-15}$ | <i>AKT3, ANXA1, AREG, AXL, BCAT1, BDNF, BIN1, BMP7, BST2, BTG3, CD24, CDH1, CDH2, CDKN2A, CEACAM6 (includes EG:4680), COL1A1, COL4A1, COL4A2, CRIP1, CTGF, CXCL12, CYR61, DNAJB4, ECM1, EGFR, EIF5A, EMP1, EMP3, EPCAM, ESR1, FABP5, FKBP1B, FN1, FOSL1, FSCN1, HMGA1, ICAM1, ID2, IFI16, IGF2BP3, IGFBP3, IGFBP5, IGFBP6, IL18, IL7R, INSIG1, IRS1, KLF4, LAMB1, LOX, MGP, MSX2, MYB (includes EG:4602), NCOA3, NDN, NOV, OXTR, PDGFC, PDZK1, PTPRK, RB1, RET, RLN2, S100P, SDC2, SERPINE1, SOCS2, SPARC, STC1, TACSTD2, TBX2, TFPI2, TGFB1, TGFB1I1, TGFBI, TNFRSF6B, UGT2B15, WNT5A</i> | 78 |
| Cellular growth and proliferation | Proliferation              | Proliferation of eukaryotic cells | $1.92 \times 10^{-13}$ | <i>AKT3, ANXA1, AREG, AXL, BDNF, BMP7, CD24, CDH1, CDH2, CDKN2A, CEACAM6 (includes EG:4680), COL1A1, COL4A1, COL4A2, CTGF, CXCL12, CYR61, DNAJB4, ECM1, EGFR, EPCAM, ESR1, FABP5, FKBP1B, FN1, FSCN1, HMGA1, ICAM1, ID2, IFI16, IGF2BP3, IGFBP3, IGFBP5, IGFBP6, IL18, IL7R, IRS1, LAMB1, LOX, MGP, MSX2, MYB (includes EG:4602), NCOA3, NOV, OXTR, PDGFC, PTPRK, RB1, RET, RLN2, S100P, SDC2, SERPINE1, SOCS2, SPARC, STC1, TFPI2, TGFB1, TNFRSF6B, UGT2B15, WNT5A</i>                                                                                                                    | 61 |

|                                   |               |                                                     |                        |                                                                                                                                                                                                                                                                                                                                                                                    |    |
|-----------------------------------|---------------|-----------------------------------------------------|------------------------|------------------------------------------------------------------------------------------------------------------------------------------------------------------------------------------------------------------------------------------------------------------------------------------------------------------------------------------------------------------------------------|----|
| Cellular growth and proliferation | Proliferation | Proliferation of cell lines                         | $6.99 \times 10^{-13}$ | <i>AKT3, ANXA1, AREG, AXL, BDNF, BMP7, CD24, CDH1, CDKN2A, CEACAM6 (includes EG:4680), COL1A1, CTGF, CXCL12, CYR61, DNAJB4, EGFR, EPCAM, ESR1, FABP5, FKBP1B, FN1, FSCN1, HMGA1, ID2, IFI16, IGF2BP3, IGFBP3, IGFBP5, IGFBP6, IRS1, LOX, MSX2, MYB (includes EG:4602), NCOA3, NOV, OXTR, RB1, RET, S100P, SDC2, SERPINE1, SOCS2, SPARC, TFPI2, TGFB1, TNFRSF6B, UGT2B15, WNT5A</i> | 48 |
| Cellular growth and proliferation | Proliferation | Proliferation of tumor cell lines                   | $1.67 \times 10^{-9}$  | <i>AKT3, ANXA1, AREG, AXL, BDNF, BMP7, CD24, CDH1, CDKN2A, CEACAM6 (includes EG:4680), COL1A1, CTGF, CXCL12, CYR61, DNAJB4, EGFR, EPCAM, ESR1, FABP5, HMGA1, ID2, IGF2BP3, IGFBP3, IGFBP5, MSX2, MYB (includes EG:4602), NCOA3, NOV, RB1, RET, SERPINE1, SPARC, TFPI2, TGFB1, UGT2B15, WNT5A</i>                                                                                   | 36 |
| Cellular growth and proliferation | Proliferation | Proliferation of normal cells                       | $4.10 \times 10^{-6}$  | <i>AXL, BMP7, CD24, CDH2, CDKN2A, COL4A1, COL4A2, CTGF, CXCL12, ECM1, EGFR, FN1, HMGA1, ICAM1, IGFBP3, IGFBP5, IL18, IL7R, LAMB1, MGP, PDGFC, PTPRK, RLN2, SERPINE1, SPARC, STC1, TGFB1</i>                                                                                                                                                                                        | 27 |
| Cellular growth and proliferation | Proliferation | Proliferation of carcinoma cell lines               | $4.22 \times 10^{-6}$  | <i>AKT3, ANXA1, CXCL12, CYR61, DNAJB4, EGFR, NCOA3, RB1, TGFB1, WNT5A</i>                                                                                                                                                                                                                                                                                                          | 10 |
| Cellular growth and proliferation | Proliferation | Proliferation of connective tissue cells            | $6.22 \times 10^{-6}$  | <i>CDKN2A, CTGF, FN1, IGFBP3, IGFBP5, IL18, PDGFC, RLN2, STC1, TGFB1</i>                                                                                                                                                                                                                                                                                                           | 10 |
| Cellular growth and proliferation | Proliferation | Proliferation of chondrocytes                       | $1.79 \times 10^{-5}$  | <i>CTGF, IGFBP3, IL18, STC1</i>                                                                                                                                                                                                                                                                                                                                                    | 4  |
| Cellular growth and proliferation | Proliferation | Proliferation of breast cancer cell lines           | $9.31 \times 10^{-5}$  | <i>BMP7, CDKN2A, CYR61, EGFR, ESR1, ID2, IGFBP3, MYB (includes EG:4602), NCOA3, SERPINE1, TGFB1</i>                                                                                                                                                                                                                                                                                | 11 |
| Cellular growth and proliferation | Proliferation | Proliferation of lung cancer cell lines             | $1.97 \times 10^{-4}$  | <i>AKT3, ANXA1, AXL, CYR61, DNAJB4, EGFR, NCOA3, RB1</i>                                                                                                                                                                                                                                                                                                                           | 8  |
| Cellular growth and proliferation | Proliferation | Proliferation of breast cell lines                  | $4.02 \times 10^{-4}$  | <i>CDH1, IGFBP3, LOX, TGFB1</i>                                                                                                                                                                                                                                                                                                                                                    | 4  |
| Cellular growth and proliferation | Proliferation | Proliferation of squamous cell carcinoma cell lines | $4.02 \times 10^{-4}$  | <i>ANXA1, CDH1, EGFR, EPCAM</i>                                                                                                                                                                                                                                                                                                                                                    | 4  |
| Cellular growth and proliferation | Proliferation | Proliferation of pancreatic cancer cell lines       | $1.45 \times 10^{-3}$  | <i>CEACAM6 (includes EG:4680), HMGA1, MSX2, NCOA3</i>                                                                                                                                                                                                                                                                                                                              | 4  |

|                                   |               |                                           |                        |                                                                                                                                                                                                                                                                                                                                                                                                                                                                                                                                                   |    |
|-----------------------------------|---------------|-------------------------------------------|------------------------|---------------------------------------------------------------------------------------------------------------------------------------------------------------------------------------------------------------------------------------------------------------------------------------------------------------------------------------------------------------------------------------------------------------------------------------------------------------------------------------------------------------------------------------------------|----|
| Cellular growth and proliferation | Proliferation | Proliferation of thyroid tumor cell lines | $1.74 \times 10^{-3}$  | <i>CXCL12, TGFB1, WNT5A</i>                                                                                                                                                                                                                                                                                                                                                                                                                                                                                                                       | 3  |
| Cellular growth and proliferation | Proliferation | Proliferation of lung cell lines          | $2.28 \times 10^{-3}$  | <i>CDKN2A, FN1, IFI16</i>                                                                                                                                                                                                                                                                                                                                                                                                                                                                                                                         | 3  |
| Cellular growth and proliferation | Proliferation | Proliferation of endothelial cells        | $3.19 \times 10^{-3}$  | <i>AXL, CDH2, COL4A1, COL4A2, ECM1, FN1, MGP</i>                                                                                                                                                                                                                                                                                                                                                                                                                                                                                                  | 7  |
| Cellular growth and proliferation | Proliferation | Proliferation of colon cancer cell lines  | $5.20 \times 10^{-3}$  | <i>AREG, CD24, ID2, RB1, TGFB1</i>                                                                                                                                                                                                                                                                                                                                                                                                                                                                                                                | 5  |
| Cellular growth and proliferation | Proliferation | Proliferation of epithelial cells         | $6.18 \times 10^{-3}$  | <i>EGFR, LAMB1, PTPRK, SPARC, TGFB1</i>                                                                                                                                                                                                                                                                                                                                                                                                                                                                                                           | 5  |
| Cellular growth and proliferation | Proliferation | Proliferation of epidermal cells          | $6.46 \times 10^{-3}$  | <i>EGFR, PTPRK, TGFB1</i>                                                                                                                                                                                                                                                                                                                                                                                                                                                                                                                         | 3  |
| Cellular growth and proliferation | Proliferation | Proliferation of T lymphocytes            | $1.28 \times 10^{-2}$  | <i>CD24, CDKN2A, CXCL12, FN1, ICAM1, IL18, IL7R, TGFB1</i>                                                                                                                                                                                                                                                                                                                                                                                                                                                                                        | 8  |
| Cellular growth and proliferation | Proliferation | Proliferation of endocrine cells          | $1.35 \times 10^{-2}$  | <i>FN1, TGFB1</i>                                                                                                                                                                                                                                                                                                                                                                                                                                                                                                                                 | 2  |
| Cellular growth and proliferation | Proliferation | Proliferation of fibroblast cell lines    | $1.68 \times 10^{-2}$  | <i>CDKN2A, CXCL12, FN1, S100P, TGFB1</i>                                                                                                                                                                                                                                                                                                                                                                                                                                                                                                          | 5  |
| Cellular growth and proliferation | Growth        | Growth of cells                           | $1.60 \times 10^{-12}$ | <i>ABCB1, AKT3, ANXA1, AREG, BMP7, CALCR, CDA, CDH1, CDKN2A, COL6A1, COL6A2, CTGF, CXADR, CXCL12, CYR61, DBN1, DKK3, DNAJB4, ECM1, EGFR, EIF5A, ESR1, FBN2 (includes EG:2201), FHL2, FN1, FOSL1, GDF15, GFRA1, GJA1, GPX1, GPX3, GSTP1, HMGA1, HMGA2, ID2, IFI16, IGFBP3, IGFBP5, IRS1, KLF4, LAMB1, MCAM, MSX2, MUC1, MYL9 (includes EG:10398), NCOA3, NDN, NOV, NRCAM, OXTR, PDCD10, PEG10, PIK3R1, PLAGL1, PRAME (includes EG:23532), RB1, RET, SDC2, SERPINE1, SERPINE2, SERTAD2, SPARC, TFAP2C, TFF3, TGFB1, TNFRSF6B, UBE2L6, XBP1, ZYX</i> | 69 |

|                                   |        |                                      |                        |                                                                                                                                                                                                                                                                                                                                                                                 |    |
|-----------------------------------|--------|--------------------------------------|------------------------|---------------------------------------------------------------------------------------------------------------------------------------------------------------------------------------------------------------------------------------------------------------------------------------------------------------------------------------------------------------------------------|----|
| Cellular growth and proliferation | Growth | Growth of eukaryotic cells           | $6.99 \times 10^{-12}$ | <i>ABCB1, AKT3, ANXA1, AREG, BMP7, CALCR, CDH1, CDKN2A, CTGF, CXADR, CYR61, DKK3, DNAJB4, EGFR, EIF5A, ESR1, FHL2, FN1, FOSL1, GDF15, GFRA1, GJA1, HMGA1, HMGA2, ID2, IFI16, IGFBP3, IGFBP5, IRS1, KLF4, MCAM, MSX2, MYL9 (includes EG:10398), NCOA3, NOV, NRCAM, OXTR, PDCD10, PEG10, PIK3R1, PLAGL1, PRAME (includes EG:23532), RB1, RET, SDC2, TFAP2C, TFF3, TGFB1, XBP1</i> | 49 |
| Cellular growth and proliferation | Growth | Growth of cell lines                 | $5.80 \times 10^{-11}$ | <i>ABCB1, AKT3, ANXA1, AREG, BMP7, CALCR, CDH1, CDKN2A, CTGF, CXADR, CYR61, DKK3, DNAJB4, EGFR, EIF5A, ESR1, FN1, FOSL1, GDF15, GJA1, HMGA1, HMGA2, IFI16, IGFBP3, IGFBP5, IRS1, KLF4, MSX2, MYL9 (includes EG:10398), NCOA3, NOV, NRCAM, OXTR, PDCD10, PIK3R1, PLAGL1, PRAME (includes EG:23532), RB1, RET, SDC2, TFAP2C, TGFB1, XBP1</i>                                      | 43 |
| Cellular growth and proliferation | Growth | Growth of tumor cell lines           | $1.55 \times 10^{-10}$ | <i>ABCB1, AKT3, ANXA1, CDH1, CDKN2A, CTGF, CXADR, CYR61, DKK3, DNAJB4, EGFR, EIF5A, ESR1, FOSL1, GDF15, GJA1, HMGA1, HMGA2, IFI16, IGFBP3, IGFBP5, IRS1, KLF4, MSX2, MYL9 (includes EG:10398), NCOA3, NOV, PDCD10, PIK3R1, PLAGL1, PRAME (includes EG:23532), RB1, RET, SDC2, TFAP2C, TGFB1, XBP1</i>                                                                           | 37 |
| Cellular growth and proliferation | Growth | Growth of breast cancer cell lines   | $3.81 \times 10^{-6}$  | <i>CDH1, CYR61, EGFR, ESR1, GJA1, HMGA1, IGFBP3, IGFBP5, IRS1, NCOA3, TFAP2C, TGFB1, XBP1</i>                                                                                                                                                                                                                                                                                   | 13 |
| Cellular growth and proliferation | Growth | Growth of neuroblastoma cell lines   | $2.29 \times 10^{-4}$  | <i>EGFR, HMGA2, IGFBP5, RET</i>                                                                                                                                                                                                                                                                                                                                                 | 4  |
| Cellular growth and proliferation | Growth | Arrest in growth of eukaryotic cells | $8.52 \times 10^{-4}$  | <i>AKT3, BMP7, CDKN2A, KLF4, PRAME (includes EG:23532), RB1, TGFB1</i>                                                                                                                                                                                                                                                                                                          | 7  |
| Cellular growth and proliferation | Growth | Growth of epithelial cells           | $8.74 \times 10^{-4}$  | <i>AREG, EGFR, FHL2, ID2, RB1</i>                                                                                                                                                                                                                                                                                                                                               | 5  |
| Cellular growth and proliferation | Growth | Growth of cancer cells               | $1.20 \times 10^{-3}$  | <i>CDKN2A, GFRA1, MCAM, PEG10, RB1, TFF3, TGFB1</i>                                                                                                                                                                                                                                                                                                                             | 7  |
| Cellular growth and proliferation | Growth | Growth of tumor cells                | $1.34 \times 10^{-3}$  | <i>CDKN2A, GFRA1, HMGA2, MCAM, PEG10, RB1, TFF3, TGFB1</i>                                                                                                                                                                                                                                                                                                                      | 8  |

|                                   |                  |                                              |                       |                                                                                                                                                    |    |
|-----------------------------------|------------------|----------------------------------------------|-----------------------|----------------------------------------------------------------------------------------------------------------------------------------------------|----|
| Cellular growth and proliferation | Growth           | Growth of fibroblast cell lines              | $1.66 \times 10^{-3}$ | <i>EGFR, FN1, IGFBP3, IRS1, NRCAM, RET, TGFB1</i>                                                                                                  | 7  |
| Cellular growth and proliferation | Growth           | Growth of epidermal cells                    | $5.41 \times 10^{-3}$ | <i>EGFR, FHL2, ID2</i>                                                                                                                             | 3  |
| Cellular growth and proliferation | Growth           | Arrest in growth of cell lines               | $6.18 \times 10^{-3}$ | <i>AKT3, BMP7, KLF4, PRAME (includes EG:23532), TGFB1</i>                                                                                          | 5  |
| Cellular growth and proliferation | Growth           | Growth of carcinoma cell lines               | $6.19 \times 10^{-3}$ | <i>AKT3, ANXA1, DNAJB4, IGFBP3, NOV, PIK3R1</i>                                                                                                    | 6  |
| Cellular growth and proliferation | Growth           | Growth of endometrial cancer cell lines      | $7.45 \times 10^{-3}$ | <i>CYR61, ESR1</i>                                                                                                                                 | 2  |
| Cellular growth and proliferation | Growth           | Growth of squamous cell carcinoma cell lines | $1.03 \times 10^{-2}$ | <i>CDKN2A, EGFR</i>                                                                                                                                | 2  |
| Cellular growth and proliferation | Growth           | Growth of prostate cancer cell lines         | $1.14 \times 10^{-2}$ | <i>CXADR, IFI16, IGFBP5, PDCD10, TGFB1</i>                                                                                                         | 5  |
| Cellular growth and proliferation | Growth           | Growth of lung cancer cell lines             | $1.48 \times 10^{-2}$ | <i>AKT3, ANXA1, DNAJB4, IGFBP3, PIK3R1</i>                                                                                                         | 5  |
| Cellular growth and proliferation | Growth           | Growth of normal cells                       | $1.51 \times 10^{-2}$ | <i>AREG, CDKN2A, EGFR, FHL2, ID2, IGFBP5, RB1, TGFB1</i>                                                                                           | 8  |
| Cellular growth and proliferation | Growth           | Growth of connective tissue cells            | $1.52 \times 10^{-2}$ | <i>AREG, CDKN2A, TGFB1</i>                                                                                                                         | 3  |
| Cellular growth and proliferation | Growth           | Growth of pancreatic cancer cell lines       | $1.52 \times 10^{-2}$ | <i>IGFBP3, MSX2, NCOA3</i>                                                                                                                         | 3  |
| Cellular growth and proliferation | Colony formation | Colony formation by cells                    | $2.83 \times 10^{-5}$ | <i>ANKRD1, CDA, CDKN2A, CEACAM5 (includes EG:1048), CXCL12, CYR61, EGFR, IFI16, IGFBP3, IRS1, NCOA3, PIK3R1, PLAGL1, RB1, SPARC, TGFB1, TGFB11</i> | 17 |
| Cellular growth and proliferation | Colony formation | Colony formation by eukaryotic cells         | $1.45 \times 10^{-4}$ | <i>ANKRD1, CDA, CDKN2A, CEACAM5 (includes EG:1048), CYR61, EGFR, IFI16, IGFBP3, IRS1, NCOA3, PIK3R1, RB1, SPARC, TGFB1, TGFB11</i>                 | 15 |



|                   |          |                                        |                       |                                                                                                                                                                                                                                                                                                        |    |
|-------------------|----------|----------------------------------------|-----------------------|--------------------------------------------------------------------------------------------------------------------------------------------------------------------------------------------------------------------------------------------------------------------------------------------------------|----|
| Cellular movement | Invasion | Invasion of prostate cancer cell lines | $5.23 \times 10^{-6}$ | <i>BMP7, CDH1, FABP5, FN1, MMP1</i> (includes <i>EG:4312</i> ), <i>NCOA3, VIM</i>                                                                                                                                                                                                                      | 7  |
| Cellular movement | Invasion | Invasion of colon cancer cell lines    | $1.50 \times 10^{-4}$ | <i>ANXA1, EGFR, NUAK1, TFF1, TFF3</i>                                                                                                                                                                                                                                                                  | 5  |
| Cellular movement | Invasion | Invasion of epithelial cell lines      | $1.67 \times 10^{-4}$ | <i>AREG, CDH1, EGFR, FSCN1</i>                                                                                                                                                                                                                                                                         | 4  |
| Cellular movement | Invasion | Invasion of carcinoma cell lines       | $2.76 \times 10^{-4}$ | <i>AKT3, DNAJB4, TGFB1, VIM, WNT5A</i>                                                                                                                                                                                                                                                                 | 5  |
| Cellular movement | Invasion | Invasion of breast cell lines          | $3.94 \times 10^{-4}$ | <i>EGFR, FXYD5, TGFB1</i>                                                                                                                                                                                                                                                                              | 3  |
| Cellular movement | Invasion | Invasion of lung cancer cell lines     | $1.72 \times 10^{-3}$ | <i>AKT3, AXL, DNAJB4, TGFB1</i>                                                                                                                                                                                                                                                                        | 4  |
| Cellular movement | Invasion | Invasion of hepatoma cell lines        | $2.28 \times 10^{-3}$ | <i>MMP1</i> (includes <i>EG:4312</i> ), <i>TFPI2, TGFB1</i>                                                                                                                                                                                                                                            | 3  |
| Cellular movement | Invasion | Invasion of breast cancer cell lines   | $3.88 \times 10^{-3}$ | <i>CDH1, ESR1, FN1, FXYD5, LOX, MMP1</i> (includes <i>EG:4312</i> ), <i>SPARC</i>                                                                                                                                                                                                                      | 7  |
| Cellular movement | Invasion | Invasion of melanoma cells             | $7.45 \times 10^{-3}$ | <i>CDH1, MCAM</i>                                                                                                                                                                                                                                                                                      | 2  |
| Cellular movement | Invasion | Invasion of bone cancer cell lines     | $1.03 \times 10^{-2}$ | <i>DKK3, NOV</i>                                                                                                                                                                                                                                                                                       | 2  |
| Cellular movement | Invasion | Invasion of thyroid tumor cell lines   | $1.03 \times 10^{-2}$ | <i>VIM, WNT5A</i>                                                                                                                                                                                                                                                                                      | 2  |
| Cellular movement | Movement | Movement of cells                      | $1.56 \times 10^{-9}$ | <i>AKT3, ANXA1, AREG, AXL, BDNF, CDH1, CDH2, CDKN2A, COL4A1, COL4A2, CTGF, CXCL12, CYR61, EGFR, FN1, FYN, GJA1, ICAM1, ICAM2, ID2, IGFBP3, IGFBP5, IGFBP6, IL18, LAMB1, LOX, MGP, MSX2, NCOA3, NOV, PTPRK, RASGRP1, RET, RLN2, S100P, SERPINA3, SERPINE1, STC1, TFF3, TGFB1, TGM2, TNFRSF6B, WNT5A</i> | 43 |
| Cellular movement | Movement | Movement of eukaryotic cells           | $1.13 \times 10^{-8}$ | <i>AKT3, ANXA1, AXL, BDNF, CDH1, CDH2, CDKN2A, COL4A1, COL4A2, CTGF, CXCL12, CYR61, EGFR, FN1, FYN, GJA1, ICAM1, ICAM2, IGFBP3, IGFBP5, IGFBP6, IL18, LOX, MGP, MSX2, NCOA3, NOV, RASGRP1, RET, RLN2, S100P, SERPINA3, SERPINE1, STC1, TFF3, TGFB1, TGM2, TNFRSF6B, WNT5A</i>                          | 39 |

|                   |           |                                         |                       |                                                                                                                                                                                                                                                                                                  |    |
|-------------------|-----------|-----------------------------------------|-----------------------|--------------------------------------------------------------------------------------------------------------------------------------------------------------------------------------------------------------------------------------------------------------------------------------------------|----|
| Cellular movement | Movement  | Movement of cell lines                  | $1.79 \times 10^{-5}$ | <i>AKT3, CDH1, CDH2, CDKN2A, CXCL12, EGFR, FN1, FYN, GJA1, ICAM1, IGFBP6, LOX, MSX2, NCOA3, NOV, RET, RLN2, SERPINE1, TFF3, TGFB1, TNFRSF6B, WNT5A</i>                                                                                                                                           | 22 |
| Cellular movement | Movement  | Movement of tumor cell lines            | $2.19 \times 10^{-5}$ | <i>AKT3, CDH1, CDH2, CDKN2A, CXCL12, EGFR, FN1, FYN, GJA1, IGFBP6, MSX2, NCOA3, NOV, RET, RLN2, SERPINE1, TGFB1, WNT5A</i>                                                                                                                                                                       | 18 |
| Cellular movement | Movement  | Movement of neuroblastoma cell lines    | $2.29 \times 10^{-4}$ | <i>CXCL12, EGFR, RET</i>                                                                                                                                                                                                                                                                         | 3  |
| Cellular movement | Movement  | Movement of rhabdomyosarcoma cell lines | $5.28 \times 10^{-4}$ | <i>CXCL12, IGFBP6</i>                                                                                                                                                                                                                                                                            | 2  |
| Cellular movement | Movement  | Movement of kidney cell lines           | $9.99 \times 10^{-3}$ | <i>FN1, ICAM1, RET, TFF3</i>                                                                                                                                                                                                                                                                     | 4  |
| Cellular movement | Migration | Migration of cells                      | $3.34 \times 10^{-9}$ | <i>AKT3, ANXA1, AREG, AXL, BDNF, CDH1, CDH2, CDKN2A, COL4A1, COL4A2, CTGF, CXCL12, CYR61, EGFR, FN1, FYN, GJA1, ICAM1, ICAM2, ID2, IGFBP3, IGFBP5, IGFBP6, IL18, LAMB1, LOX, MGP, MSX2, NCOA3, NOV, PTPRK, RASGRP1, RET, RLN2, S100P, SERPINA3, SERPINE1, STC1, TGFB1, TGM2, TNFRSF6B, WNT5A</i> | 42 |
| Cellular movement | Migration | Migration of eukaryotic cells           | $2.40 \times 10^{-8}$ | <i>AKT3, ANXA1, AXL, BDNF, CDH1, CDH2, CDKN2A, COL4A1, COL4A2, CTGF, CXCL12, CYR61, EGFR, FN1, FYN, GJA1, ICAM1, ICAM2, IGFBP3, IGFBP5, IGFBP6, IL18, LOX, MGP, MSX2, NCOA3, NOV, RASGRP1, RET, RLN2, S100P, SERPINA3, SERPINE1, STC1, TGFB1, TGM2, TNFRSF6B, WNT5A</i>                          | 38 |
| Cellular movement | Migration | Migration of normal cells               | $1.30 \times 10^{-7}$ | <i>ANXA1, AXL, BDNF, CDH1, CDH2, COL4A1, COL4A2, CTGF, CXCL12, CYR61, EGFR, FN1, ICAM1, ICAM2, IGFBP3, IGFBP5, IL18, MGP, RASGRP1, RLN2, S100P, SERPINA3, SERPINE1, STC1, TGFB1, TGM2, TNFRSF6B</i>                                                                                              | 27 |
| Cellular movement | Migration | Migration of endothelial cells          | $2.54 \times 10^{-7}$ | <i>AXL, COL4A1, COL4A2, CXCL12, CYR61, FN1, ICAM1, IGFBP3, MGP, S100P, SERPINE1, STC1, TGFB1</i>                                                                                                                                                                                                 | 13 |
| Cellular movement | Migration | Migration of cell lines                 | $4.25 \times 10^{-5}$ | <i>AKT3, CDH1, CDH2, CDKN2A, CXCL12, EGFR, FN1, FYN, GJA1, ICAM1, IGFBP6, LOX, MSX2, NCOA3, NOV, RET, RLN2, SERPINE1, TGFB1, TNFRSF6B, WNT5A</i>                                                                                                                                                 | 21 |
| Cellular movement | Migration | Migration of tumor cell lines           | $6.22 \times 10^{-5}$ | <i>AKT3, CDH1, CDH2, CDKN2A, CXCL12, EGFR, FN1, FYN, GJA1, IGFBP6, MSX2, NCOA3, NOV, RLN2, SERPINE1, TGFB1, WNT5A</i>                                                                                                                                                                            | 17 |
| Cellular movement | Migration | Migration of myeloid cells              | $6.84 \times 10^{-5}$ | <i>ANXA1, CXCL12, FN1, ICAM1, SERPINE1, TGFB1, TGM2</i>                                                                                                                                                                                                                                          | 7  |
| Cellular movement | Migration | Migration of neutrophils                | $3.97 \times 10^{-4}$ | <i>ANXA1, FN1, ICAM1, SERPINE1, TGFB1</i>                                                                                                                                                                                                                                                        | 5  |
| Cellular movement | Migration | Migration of granulocytes               | $4.78 \times 10^{-4}$ | <i>ANXA1, CXCL12, FN1, ICAM1, SERPINE1, TGFB1</i>                                                                                                                                                                                                                                                | 6  |

|                   |               |                                         |                       |                                                                                                                                                                                                                          |    |
|-------------------|---------------|-----------------------------------------|-----------------------|--------------------------------------------------------------------------------------------------------------------------------------------------------------------------------------------------------------------------|----|
| Cellular movement | Migration     | Lymphocyte migration                    | $6.53 \times 10^{-4}$ | <i>CXCL12, EGFR, FN1, ICAM1, ICAM2, IL18, RASGRP1, TGM2, TNFRSF6B</i>                                                                                                                                                    | 9  |
| Cellular movement | Migration     | Migration of mononuclear leukocytes     | $8.93 \times 10^{-4}$ | <i>CXCL12, EGFR, FN1, ICAM1, ICAM2, IL18, RASGRP1, TGFB1, TGM2, TNFRSF6B</i>                                                                                                                                             | 10 |
| Cellular movement | Migration     | Migration of breast cancer cell lines   | $1.54 \times 10^{-3}$ | <i>CDH2, CXCL12, EGFR, FN1, GJA1, RLN2, SERPINE1</i>                                                                                                                                                                     | 7  |
| Cellular movement | Migration     | Migration of leukocytes                 | $1.64 \times 10^{-3}$ | <i>ANXA1, CXCL12, EGFR, FN1, ICAM1, ICAM2, IL18, RASGRP1, RLN2, SERPINA3, SERPINE1, TGFB1, TGM2, TNFRSF6B</i>                                                                                                            | 14 |
| Cellular movement | Migration     | Migration of bone cancer cell lines     | $1.74 \times 10^{-3}$ | <i>FN1, FYN, NOV</i>                                                                                                                                                                                                     | 3  |
| Cellular movement | Migration     | Migration of lung cancer cell lines     | $2.28 \times 10^{-3}$ | <i>AKT3, CDKN2A, TGFB1</i>                                                                                                                                                                                               | 3  |
| Cellular movement | Migration     | Migration of carcinoma cell lines       | $2.91 \times 10^{-3}$ | <i>AKT3, TGFB1, WNT5A</i>                                                                                                                                                                                                | 3  |
| Cellular movement | Migration     | Migration of breast cell lines          | $3.64 \times 10^{-3}$ | <i>EGFR, LOX, TGFB1</i>                                                                                                                                                                                                  | 3  |
| Cellular movement | Migration     | Migration of prostate cancer cell lines | $7.40 \times 10^{-3}$ | <i>CDH1, CXCL12, FN1, NCOA3</i>                                                                                                                                                                                          | 4  |
| Cellular movement | Cell movement | Cell movement of cell lines             | $1.68 \times 10^{-8}$ | <i>BMP7, CCR10, CD24, CDH2, CLDN3, CXCL12, DKK3, DNAJB4, EGFR, ESR1, FN1, FOSL1, FSCN1, KRT19, NRCAM, RET, RLN2, SERPINE1, SPARC, TFF3, TGFB1, WNT5A</i>                                                                 | 22 |
| Cellular movement | Cell movement | Cell movement of tumor cell lines       | $1.95 \times 10^{-7}$ | <i>BMP7, CD24, CDH2, CLDN3, CXCL12, DKK3, DNAJB4, EGFR, ESR1, FN1, FOSL1, KRT19, RLN2, SERPINE1, SPARC, TGFB1, WNT5A</i>                                                                                                 | 17 |
| Cellular movement | Cell movement | Cell movement of eukaryotic cells       | $5.03 \times 10^{-7}$ | <i>ANXA1, BDNF, BMP7, CCR10, CD24, CDH2, CLDN3, CXCL12, DKK3, DNAJB4, EGFR, ESR1, FN1, FOSL1, FSCN1, ICAM1, KRT19, NRCAM, RET, RLN2, SERPINA3, SERPINE1, SPARC, TFF3, TGFB1, TNFRSF6B, WNT5A</i>                         | 27 |
| Cellular movement | Cell movement | Cell movement                           | $5.31 \times 10^{-7}$ | <i>ANXA1, BDNF, BMP7, CALD1, CCR10, CD24, CDH2, CLDN3, CXCL12, CYR61, DKK3, DNAJB4, EGFR, ESR1, FN1, FOSL1, FSCN1, ICAM1, KRT19, MSN, NRCAM, RET, RLN2, SERPINA3, SERPINE1, SPARC, TFF3, TGFB1, TNFRSF6B, VIM, WNT5A</i> | 31 |
| Cellular movement | Cell movement | Cell movement of lung cancer cell lines | $3.94 \times 10^{-4}$ | <i>DNAJB4, FN1, FOSL1</i>                                                                                                                                                                                                | 3  |

|                   |               |                                               |                       |                                                                                                   |    |
|-------------------|---------------|-----------------------------------------------|-----------------------|---------------------------------------------------------------------------------------------------|----|
| Cellular movement | Cell movement | Cell movement of breast cancer cell lines     | $1.49 \times 10^{-3}$ | <i>ESR1, KRT19, SERPINE1, SPARC, TGFB1</i>                                                        | 5  |
| Cellular movement | Cell movement | Cell movement of leukemia cells               | $3.07 \times 10^{-3}$ | <i>CXCL12, TGFB1</i>                                                                              | 2  |
| Cellular movement | Cell movement | Cell movement of lung cell lines              | $5.04 \times 10^{-3}$ | <i>FOSL1, TFF3</i>                                                                                | 2  |
| Cellular movement | Cell movement | Cell movement of pancreatic cancer cell lines | $5.04 \times 10^{-3}$ | <i>CDH2, TGFB1</i>                                                                                | 2  |
| Cellular movement | Cell movement | Cell movement of carcinoma cell lines         | $1.35 \times 10^{-2}$ | <i>DNAJB4, FOSL1</i>                                                                              | 2  |
| Cellular movement | Scattering    | Scattering of cell lines                      | $1.06 \times 10^{-5}$ | <i>EGFR, FN1, MSX2, RET, TFF3</i>                                                                 | 5  |
| Cellular movement | Scattering    | Scattering of tumor cell lines                | $3.94 \times 10^{-4}$ | <i>EGFR, MSX2, RET</i>                                                                            | 3  |
| Cellular movement | Scattering    | Scattering of neuroblastoma cell lines        | $5.28 \times 10^{-4}$ | <i>EGFR, RET</i>                                                                                  | 2  |
| Cellular movement | Scattering    | Scattering of kidney cell lines               | $7.45 \times 10^{-3}$ | <i>FN1, TFF3</i>                                                                                  | 2  |
| Cellular movement | Chemotaxis    | Chemotaxis of granule cells                   | $5.28 \times 10^{-4}$ | <i>BDNF, CXCL12</i>                                                                               | 2  |
| Cellular movement | Chemotaxis    | Chemotaxis of rhabdomyosarcoma cell lines     | $1.56 \times 10^{-3}$ | <i>CXCL12, FN1</i>                                                                                | 2  |
| Cellular movement | Chemotaxis    | Chemotaxis of microglia                       | $5.04 \times 10^{-3}$ | <i>TGFB1, TNFRSF6B</i>                                                                            | 2  |
| Cellular movement | Chemotaxis    | Chemotaxis                                    | $1.49 \times 10^{-2}$ | <i>ANXA1, BDNF, CCR10, CXCL12, CYR61, EGFR, FN1, FOSL1, RLN2, SERPINA3, TFF3, TGFB1, TNFRSF6B</i> | 13 |
| Cellular movement | Locomotion    | Locomotion of eukaryotic cells                | $5.28 \times 10^{-4}$ | <i>CXCL12, TGFB1</i>                                                                              | 2  |
| Cellular movement | Adhesion      | Adhesion of t lymphocytes                     | $2.12 \times 10^{-3}$ | <i>CXCL12, FN1, ICAM1, ICAM2, RASGRP1</i>                                                         | 5  |

|                          |                           |                           |                        |                                                                                                                                                                                                                                                                                                                                                                                                                                            |    |
|--------------------------|---------------------------|---------------------------|------------------------|--------------------------------------------------------------------------------------------------------------------------------------------------------------------------------------------------------------------------------------------------------------------------------------------------------------------------------------------------------------------------------------------------------------------------------------------|----|
| Gastrointestinal disease | Colorectal cancer         | Colorectal cancer         | $5.18 \times 10^{-15}$ | <i>AKR1C2, AKT3, ANK3, BEX1, BMP7, BST2, CA2, CALD1, CDH2, CDKN2A, CLDN3, CLGN, COL4A1, COL4A2, COL6A1, COL6A2, CRIP1, CTGF, CXCL12, CYP1B1, EGFR, EMP1, EPCAM, FBN2 (includes EG:2201), FN1, FSCN1, FYN, GDF15, GJA1, GLUL, GREB1, HIST1H2BD, HIST1H4H (includes EG:8365), ICAM1, ID2, IGFBP5, INSIG1, IRS1, MAFB, MCAM, MLPH, NUAQ1, RET, SERPINA3, SERPINE1, SERTAD2, SLC12A8, SLC16A3, SRPX, STXBP6, TFF3, TM4SF1, TPD52L1, TUBB2A</i> | 54 |
| Gastrointestinal disease | Pancreatic tumor          | Pancreatic tumor          | $3.40 \times 10^{-9}$  | <i>AXL, CDKN2A, CREBBP, CYR61, EGFR, FN1, IGFBP3, IGFBP5, KLF4, KRT7, KRT19, MSLN, MSX2, PIK3R1, RET, SERPINE2, TFF1, TUBB2A</i>                                                                                                                                                                                                                                                                                                           | 18 |
| Gastrointestinal disease | Digestive organ tumor     | Digestive organ tumor     | $3.56 \times 10^{-9}$  | <i>ABCB1, AKT3, ANXA1, AXL, CA2, CDH1, CDKN2A, COL1A1, CREBBP, CYR61, EGFR, FN1, FSCN1, FYN, GDF15, GJA1, GSTP1, IGFBP3, IGFBP5, INSIG1, KLF4, KRT7, KRT19, MSLN, MSX2, NNMT, PIK3R1, RB1, RET, SERPINE2, TFF1, TM4SF1, TUBB2A, VIM, WWOX</i>                                                                                                                                                                                              | 35 |
| Gastrointestinal disease | Colon cancer              | Colon cancer              | $8.99 \times 10^{-6}$  | <i>AKT3, BMP7, BST2, CA2, CALD1, CLDN3, COL6A1, COL6A2, CRIP1, EGFR, FN1, FSCN1, GDF15, GJA1, HIST1H2BD, HIST1H4H (includes EG:8365), INSIG1, MCAM, SERPINA3, SERPINE1, STXBP6, TFF3, TPD52L1, TUBB2A</i>                                                                                                                                                                                                                                  | 24 |
| Gastrointestinal disease | Pancreatic adenocarcinoma | Pancreatic adenocarcinoma | $3.67 \times 10^{-5}$  | <i>AXL, CYR61, IGFBP3, KRT7, KRT19, MSLN, SERPINE2</i>                                                                                                                                                                                                                                                                                                                                                                                     | 7  |
| Gastrointestinal disease | Pancreatic carcinoma      | Pancreatic carcinoma      | $4.17 \times 10^{-4}$  | <i>AXL, CYR61, IGFBP3, KRT7, KRT19, MSLN, MSX2, SERPINE2</i>                                                                                                                                                                                                                                                                                                                                                                               | 8  |
| Gastrointestinal disease | Acinar-cell carcinoma     | Acinar-cell carcinoma     | $1.21 \times 10^{-3}$  | <i>CREBBP, FN1, IGFBP5, PIK3R1</i>                                                                                                                                                                                                                                                                                                                                                                                                         | 4  |
| Gastrointestinal disease | Esophageal carcinoma      | Esophageal carcinoma      | $1.21 \times 10^{-3}$  | <i>EGFR, GSTP1, RB1, WWOX</i>                                                                                                                                                                                                                                                                                                                                                                                                              | 4  |
| Gastrointestinal disease | Salivary gland tumor      | Salivary gland tumor      | $1.92 \times 10^{-3}$  | <i>CREBBP, FN1, IGFBP5, INSIG1, PIK3R1, RET</i>                                                                                                                                                                                                                                                                                                                                                                                            | 6  |
| Gastrointestinal disease | Mucoepidermoid carcinoma  | Mucoepidermoid carcinoma  | $2.94 \times 10^{-3}$  | <i>CREBBP, FN1, IGFBP5, INSIG1, PIK3R1</i>                                                                                                                                                                                                                                                                                                                                                                                                 | 5  |
| Gastrointestinal disease | Esophageal cancer         | Esophageal cancer         | $5.28 \times 10^{-3}$  | <i>ADA, EGFR, GSTP1, RB1, RET, TUBB2A, WWOX</i>                                                                                                                                                                                                                                                                                                                                                                                            | 7  |
| Gastrointestinal disease | Cholangiocarcinoma        | Cholangiocarcinoma        | $6.65 \times 10^{-3}$  | <i>ANXA1, EGFR, TM4SF1, VIM</i>                                                                                                                                                                                                                                                                                                                                                                                                            | 4  |
| Gastrointestinal disease | Colorectal tumor          | Colorectal tumor          | $9.49 \times 10^{-3}$  | <i>AKT3, EGFR, FSCN1, GDF15, GJA1, INSIG1, RET, TUBB2A</i>                                                                                                                                                                                                                                                                                                                                                                                 | 8  |

|                      |                       |                                                 |                        |                                                                                                                                                                                                                                                                                                                                                              |    |
|----------------------|-----------------------|-------------------------------------------------|------------------------|--------------------------------------------------------------------------------------------------------------------------------------------------------------------------------------------------------------------------------------------------------------------------------------------------------------------------------------------------------------|----|
| Cellular development | Developmental process | Developmental process of tumor cell lines       | $3.60 \times 10^{-11}$ | <i>ABCB1, AKT3, ANXA1, BMP7, CDH1, CDKN2A, CREBBP, CTGF, CXADR, CYR61, DKK3, DNAJB4, EGFR, EIF5A, ESR1, FOSL1, GDF15, GJA1, HMGA1, HMGA2, ID2, IFI16, IGFBP3, IGFBP5, IRS1, KLF4, MSX2, MUC1, MYB (includes EG:4602), MYL9 (includes EG:10398), NCOA3, NOV, PDCD10, PIK3R1, PLAGL1, PRAME (includes EG:23532), RB1, RET, SDC2, SNCA, TFAP2C, TGFB1, XBP1</i> | 43 |
| Cellular development | Developmental process | Developmental process of epithelial cells       | $5.97 \times 10^{-7}$  | <i>ANXA1, AREG, BMP7, CDH1, COL4A1, CREBBP, EGFR, FHL2, FN1, ID2, RB1, TGFB1</i>                                                                                                                                                                                                                                                                             | 12 |
| Cellular development | Developmental process | Developmental process of epidermal cells        | $1.76 \times 10^{-4}$  | <i>ANXA1, CDH1, EGFR, FHL2, FN1, ID2, TGFB1</i>                                                                                                                                                                                                                                                                                                              | 7  |
| Cellular development | Developmental process | Developmental process of fibroblast cell lines  | $3.35 \times 10^{-4}$  | <i>BMP7, EGFR, FN1, IGFBP3, IRS1, MGP, NRCAM, RET, TGFB1</i>                                                                                                                                                                                                                                                                                                 | 9  |
| Cellular development | Developmental process | Developmental process of keratinocytes          | $4.78 \times 10^{-4}$  | <i>ANXA1, CDH1, EGFR, FN1, ID2, TGFB1</i>                                                                                                                                                                                                                                                                                                                    | 6  |
| Cellular development | Developmental process | Developmental process of cancer cells           | $4.95 \times 10^{-4}$  | <i>CDKN2A, GFRA1, MCAM, MUC1, PEG10, RB1, TFF3, TGFB1</i>                                                                                                                                                                                                                                                                                                    | 8  |
| Cellular development | Developmental process | Developmental process of tumor cells            | $5.67 \times 10^{-4}$  | <i>CDKN2A, GFRA1, HMGA2, MCAM, MUC1, PEG10, RB1, TFF3, TGFB1</i>                                                                                                                                                                                                                                                                                             | 9  |
| Cellular development | Developmental process | Developmental process of kidney cell lines      | $1.31 \times 10^{-3}$  | <i>BMP7, CALCR, ESR1, OXTR, TGFB1</i>                                                                                                                                                                                                                                                                                                                        | 5  |
| Cellular development | Developmental process | Developmental process of endothelial cells      | $1.44 \times 10^{-3}$  | <i>AXL, FN1, IGFBP3, MGP, STC1, TGFB1</i>                                                                                                                                                                                                                                                                                                                    | 6  |
| Cellular development | Developmental process | Developmental process of carcinoma cell lines   | $1.54 \times 10^{-3}$  | <i>AKT3, ANXA1, DNAJB4, IGFBP3, NOV, PIK3R1, TGFB1</i>                                                                                                                                                                                                                                                                                                       | 7  |
| Cellular development | Developmental process | Developmental process of mononuclear leukocytes | $2.78 \times 10^{-3}$  | <i>CDKN2A, CXCL12, GATA3, GFRA1, IFI16, IL18, IL7R, MUC1, RAC2, TGFB1, TNFRSF6B</i>                                                                                                                                                                                                                                                                          | 11 |

|                      |                       |                                                     |                        |                                                                                                                                                                                                                                                                                                       |    |
|----------------------|-----------------------|-----------------------------------------------------|------------------------|-------------------------------------------------------------------------------------------------------------------------------------------------------------------------------------------------------------------------------------------------------------------------------------------------------|----|
| Cellular development | Developmental process | Developmental process of lung cancer cell lines     | $3.74 \times 10^{-3}$  | <i>AKT3, ANXA1, DNAJB4, IGFBP3, PIK3R1, TGFB1</i>                                                                                                                                                                                                                                                     | 6  |
| Cellular development | Developmental process | Developmental process of prostate cancer cell lines | $3.74 \times 10^{-3}$  | <i>BMP7, CXADR, IFI16, IGFBP5, PDCD10, TGFB1</i>                                                                                                                                                                                                                                                      | 6  |
| Cellular development | Developmental process | Developmental process of myeloid leukemia cells     | $5.04 \times 10^{-3}$  | <i>GFRA1, MUC1</i>                                                                                                                                                                                                                                                                                    | 2  |
| Cellular development | Developmental process | Developmental process of thymocytes                 | $5.04 \times 10^{-3}$  | <i>CDKN2A, IL7R</i>                                                                                                                                                                                                                                                                                   | 2  |
| Cellular development | Developmental process | Developmental process of epithelial cell lines      | $6.65 \times 10^{-3}$  | <i>CALCR, ESR1, ID2, TGFB1</i>                                                                                                                                                                                                                                                                        | 4  |
| Cellular development | Developmental process | Developmental process of blood cells                | $7.17 \times 10^{-3}$  | <i>CDKN2A, CXCL12, EGFR, GATA3, GFRA1, IFI16, IL18, IL7R, MAFB, MUC1, MYB (includes EG:4602), RAC2, TGFB1, TNFRSF6B</i>                                                                                                                                                                               | 14 |
| Cellular development | Developmental process | Developmental process of bone cancer cell lines     | $8.90 \times 10^{-3}$  | <i>NOV, PLAGL1, SNCA</i>                                                                                                                                                                                                                                                                              | 3  |
| Cellular development | Developmental process | Developmental process of fibroblasts                | $1.03 \times 10^{-2}$  | <i>BMP7, CDKN2A, TGFB1</i>                                                                                                                                                                                                                                                                            | 3  |
| Cellular development | Developmental process | Developmental process of muscle cells               | $1.68 \times 10^{-2}$  | <i>IGFBP3, IGFBP5, RB1, TGFB1</i>                                                                                                                                                                                                                                                                     | 4  |
| Cellular development | Growth                | Growth of tumor cell lines                          | $1.55 \times 10^{-10}$ | <i>ABCB1, AKT3, ANXA1, CDH1, CDKN2A, CTGF, CXADR, CYR61, DKK3, DNAJB4, EGFR, EIF5A, ESR1, FOSL1, GDF15, GJA1, HMGA1, HMGA2, IFI16, IGFBP3, IGFBP5, IRS1, KLF4, MSX2, MYL9 (includes EG:10398), NCOA3, NOV, PDCD10, PIK3R1, PLAGL1, PRAME (includes EG:23532), RB1, RET, SDC2, TFAP2C, TGFB1, XBP1</i> | 37 |
| Cellular development | Growth                | Growth of breast cancer cell lines                  | $3.81 \times 10^{-6}$  | <i>CDH1, CYR61, EGFR, ESR1, GJA1, HMGA1, IGFBP3, IGFBP5, IRS1, NCOA3, TFAP2C, TGFB1, XBP1</i>                                                                                                                                                                                                         | 13 |
| Cellular development | Growth                | Growth of neuroblastoma cell lines                  | $2.29 \times 10^{-4}$  | <i>EGFR, HMGA2, IGFBP5, RET</i>                                                                                                                                                                                                                                                                       | 4  |

|                      |                 |                                              |                       |                                                                                                                                                                                                                                      |    |
|----------------------|-----------------|----------------------------------------------|-----------------------|--------------------------------------------------------------------------------------------------------------------------------------------------------------------------------------------------------------------------------------|----|
| Cellular development | Growth          | Growth of epithelial cells                   | $8.74 \times 10^{-4}$ | <i>AREG, EGFR, FHL2, ID2, RB1</i>                                                                                                                                                                                                    | 5  |
| Cellular development | Growth          | Growth of cancer cells                       | $1.20 \times 10^{-3}$ | <i>CDKN2A, GFRA1, MCAM, PEG10, RB1, TFF3, TGFB1</i>                                                                                                                                                                                  | 7  |
| Cellular development | Growth          | Growth of tumor cells                        | $1.34 \times 10^{-3}$ | <i>CDKN2A, GFRA1, HMGA2, MCAM, PEG10, RB1, TFF3, TGFB1</i>                                                                                                                                                                           | 8  |
| Cellular development | Growth          | Growth of fibroblast cell lines              | $1.66 \times 10^{-3}$ | <i>EGFR, FN1, IGFBP3, IRS1, NRCAM, RET, TGFB1</i>                                                                                                                                                                                    | 7  |
| Cellular development | Growth          | Growth of epidermal cells                    | $5.41 \times 10^{-3}$ | <i>EGFR, FHL2, ID2</i>                                                                                                                                                                                                               | 3  |
| Cellular development | Growth          | Growth of carcinoma cell lines               | $6.19 \times 10^{-3}$ | <i>AKT3, ANXA1, DNAJB4, IGFBP3, NOV, PIK3R1</i>                                                                                                                                                                                      | 6  |
| Cellular development | Growth          | Growth of endometrial cancer cell lines      | $7.45 \times 10^{-3}$ | <i>CYR61, ESR1</i>                                                                                                                                                                                                                   | 2  |
| Cellular development | Growth          | Growth of squamous cell carcinoma cell lines | $1.03 \times 10^{-2}$ | <i>CDKN2A, EGFR</i>                                                                                                                                                                                                                  | 2  |
| Cellular development | Growth          | Growth of prostate cancer cell lines         | $1.14 \times 10^{-2}$ | <i>CXADR, IFI16, IGFBP5, PDCD10, TGFB1</i>                                                                                                                                                                                           | 5  |
| Cellular development | Growth          | Growth of lung cancer cell lines             | $1.48 \times 10^{-2}$ | <i>AKT3, ANXA1, DNAJB4, IGFBP3, PIK3R1</i>                                                                                                                                                                                           | 5  |
| Cellular development | Growth          | Growth of pancreatic cancer cell lines       | $1.52 \times 10^{-2}$ | <i>IGFBP3, MSX2, NCOA3</i>                                                                                                                                                                                                           | 3  |
| Cellular development | Differentiation | Differentiation of cells                     | $6.22 \times 10^{-6}$ | <i>ANXA1, AREG, BMP7, CDH1, CDKN2A, COL4A1, CREBBP, CTGF, CXCL12, FN1, GATA3, ID2, IFI16, IGFBP3, IGFBP5, IGFBP6, IL18, KLF4, MAFB, MGP, MUC1, MYB (includes EG:4602), PIK3R1, PRAME (includes EG:23532), RB1, SNCA, STC1, TGFB1</i> | 28 |
| Cellular development | Differentiation | Differentiation of cell lines                | $1.61 \times 10^{-4}$ | <i>BMP7, CREBBP, CTGF, FN1, ID2, IGFBP5, IGFBP6, MGP, MUC1, MYB (includes EG:4602), PIK3R1, PRAME (includes EG:23532), RB1, SNCA, TGFB1</i>                                                                                          | 15 |
| Cellular development | Differentiation | Differentiation of T lymphocytes             | $2.81 \times 10^{-4}$ | <i>CDKN2A, CXCL12, GATA3, IL18, MUC1, TGFB1</i>                                                                                                                                                                                      | 6  |
| Cellular development | Differentiation | Differentiation of epithelial cells          | $1.18 \times 10^{-3}$ | <i>ANXA1, CDH1, COL4A1, CREBBP, FN1, TGFB1</i>                                                                                                                                                                                       | 6  |

|                      |                                   |                                                        |                       |                                                                                                                                          |    |
|----------------------|-----------------------------------|--------------------------------------------------------|-----------------------|------------------------------------------------------------------------------------------------------------------------------------------|----|
| Cellular development | Differentiation                   | Differentiation of tumor cell lines                    | $2.99 \times 10^{-3}$ | <i>CREBBP, CTGF, IGFBP5, MUC1, MYB</i> (includes EG:4602), <i>PIK3R1, PRAME</i> (includes EG:23532), <i>RB1, SNCA, TGFB1</i>             | 10 |
| Cellular development | Differentiation                   | Differentiation of mononuclear leukocytes              | $4.13 \times 10^{-3}$ | <i>CDKN2A, CXCL12, GATA3, IFI16, IL18, MUC1, TGFB1</i>                                                                                   | 7  |
| Cellular development | Differentiation                   | Differentiation of th2 cells                           | $5.04 \times 10^{-3}$ | <i>GATA3, TGFB1</i>                                                                                                                      | 2  |
| Cellular development | Differentiation                   | Differentiation of keratinocytes                       | $6.65 \times 10^{-3}$ | <i>ANXA1, CDH1, FN1, TGFB1</i>                                                                                                           | 4  |
| Cellular development | Differentiation                   | Differentiation of chondrocytes                        | $1.03 \times 10^{-2}$ | <i>STC1, TGFB1</i>                                                                                                                       | 2  |
| Cellular development | Differentiation                   | Differentiation of leukemia cell lines                 | $1.28 \times 10^{-2}$ | <i>CREBBP, MUC1, MYB</i> (includes EG:4602), <i>PIK3R1, RB1, TGFB1</i>                                                                   | 6  |
| Cellular development | Differentiation                   | Differentiation of muscle cells                        | $1.34 \times 10^{-2}$ | <i>IGFBP3, RB1, TGFB1</i>                                                                                                                | 3  |
| Cellular development | Differentiation                   | Differentiation of fibroblast cell lines               | $1.52 \times 10^{-2}$ | <i>BMP7, MGP, TGFB1</i>                                                                                                                  | 3  |
| Cellular development | Differentiation                   | Differentiation of blood cells                         | $1.69 \times 10^{-2}$ | <i>CDKN2A, CXCL12, GATA3, IFI16, IL18, MAFB, MUC1, MYB</i> (includes EG:4602), <i>TGFB1</i>                                              | 9  |
| Cellular development | Development                       | Development of cells                                   | $4.69 \times 10^{-4}$ | <i>BDNF, BMP7, CDH1, CDKN2A, CREBBP, CXCL12, CYR61, EGFR, FN1, GATA3, ID2, IL18, IL7R, MAP7, MUC1, RAC2, RRAS, STC1, TGFB1, TNFRSF6B</i> | 20 |
| Cellular development | Development                       | T cell development                                     | $1.70 \times 10^{-3}$ | <i>CDKN2A, CXCL12, GATA3, IL18, IL7R, MUC1, RAC2, TGFB1, TNFRSF6B</i>                                                                    | 9  |
| Cellular development | Development                       | Development of blood cells                             | $2.13 \times 10^{-3}$ | <i>CDKN2A, CXCL12, EGFR, GATA3, IL18, IL7R, MUC1, RAC2, TGFB1, TNFRSF6B</i>                                                              | 10 |
| Cellular development | Epithelial-mesenchymal transition | Epithelial-mesenchymal transition of fibroblasts       | $5.28 \times 10^{-4}$ | <i>BMP7, TGFB1</i>                                                                                                                       | 2  |
| Cellular development | Epithelial-mesenchymal transition | Epithelial-mesenchymal transition of hepatocytes       | $5.28 \times 10^{-4}$ | <i>BMP7, TGFB1</i>                                                                                                                       | 2  |
| Cellular development | Epithelial-mesenchymal transition | Epithelial-mesenchymal transition of kidney cell lines | $3.07 \times 10^{-3}$ | <i>BMP7, TGFB1</i>                                                                                                                       | 2  |

|                      |                               |                                                |                       |                                                                                                                                                                                                                                                                                                                                                                    |    |
|----------------------|-------------------------------|------------------------------------------------|-----------------------|--------------------------------------------------------------------------------------------------------------------------------------------------------------------------------------------------------------------------------------------------------------------------------------------------------------------------------------------------------------------|----|
| Cellular development | Transdifferentiation          | Transdifferentiation of epithelial cells       | $1.56 \times 10^{-3}$ | COL4A1, TGFB1                                                                                                                                                                                                                                                                                                                                                      | 2  |
| Cellular development | Transdifferentiation          | Transdifferentiation of mesenchymal cells      | $1.56 \times 10^{-3}$ | COL4A1, TGFB1                                                                                                                                                                                                                                                                                                                                                      | 2  |
| Cellular development | Apoptosis                     | Apoptosis of T lymphocytes                     | $2.71 \times 10^{-3}$ | CDKN2A, CXCL12, IL7R, RAC2, TGFB1, TNFRSF6B                                                                                                                                                                                                                                                                                                                        | 6  |
| Cellular development | Induction                     | Induction of T lymphocytes                     | $3.07 \times 10^{-3}$ | IL18, MUC1                                                                                                                                                                                                                                                                                                                                                         | 2  |
| Cellular development | Tubulation                    | Tubulation of endothelial cells                | $5.41 \times 10^{-3}$ | AXL, IGFBP3, MGP                                                                                                                                                                                                                                                                                                                                                   | 3  |
| Cellular development | Shape change                  | Shape change of fibroblasts                    | $7.45 \times 10^{-3}$ | CDKN2A, FN1                                                                                                                                                                                                                                                                                                                                                        | 2  |
| Cellular development | Activation-induced cell death | Activation-induced cell death of T lymphocytes | $1.35 \times 10^{-2}$ | RAC2, TGFB1                                                                                                                                                                                                                                                                                                                                                        | 2  |
| Genetic disorder     | Pancreatic tumor              | Pancreatic tumor                               | $3.40 \times 10^{-9}$ | AXL, CDKN2A, CREBBP, CYR61, EGFR, FN1, IGFBP3, IGFBP5, KLF4, KRT7, KRT19, MSLN, MSX2, PIK3R1, RET, SERPINE2, TFF1, TUBB2A                                                                                                                                                                                                                                          | 18 |
| Genetic disorder     | Pancreatic cancer             | Pancreatic cancer                              | $6.91 \times 10^{-8}$ | AXL, CDH2, CDKN2A, CREBBP, CYR61, EGFR, FBN2 (includes EG:2201), FN1, FYN, IGFBP3, IGFBP5, KLF4, KRT7, KRT19, MSLN, MSX2, PIK3R1, RET, SERPINE2, TFF1, TUBB2A                                                                                                                                                                                                      | 21 |
| Genetic disorder     | Non-small cell lung cancer    | Non-small cell lung cancer                     | $2.45 \times 10^{-6}$ | AKT3, B2M, CDH1, CDKN2A, DNAJB4, EGFR, EPCAM, FN1, FYN, MAFB, MSLN, RB1, RET, S100P, TUBB2A                                                                                                                                                                                                                                                                        | 15 |
| Genetic disorder     | Prostate cancer               | Prostate cancer                                | $6.19 \times 10^{-6}$ | ABAT, AKT3, CDH1, COL1A1, CYP1B1, DNAJC15, EGFR, EPCAM, ESR1, FHL2, FYN, GATA3, GDF15, GPX3, IGFBP3, IL7R, KRT7, MMP1 (includes EG:4312), MSMB, MUC1, MYL9 (includes EG:10398), PSAT1, RB1, RET, TFF3, TUBB2A, WWOX                                                                                                                                                | 27 |
| Genetic disorder     | Alzheimer disease             | Alzheimer disease                              | $7.95 \times 10^{-6}$ | ABAT, AKAP2, ANK3, BDNF, BIN1, CDC42EP3, CDKN2A, COL4A1, COL4A2, CTGF, CXCL12, DNAJC15, EML1 (includes EG:2009), ESR1, EXT1, GATA3, GREB1, GRHL2, HMGA1, ICAM1, IGFBP3, IGFBP6, LEPREL1, LPHN2, MAP1B, MMP1 (includes EG:4312), NEFH, PLTP, RAB3B, RNASET2, SCD, SELENBP1, SERPINA3, SERPINE2, SLC12A8, SNCA, SPARC, STXBP6, TGFB1, TGM2, TUBB2A, UBB, UCHL1, WWOX | 44 |
| Genetic disorder     | Colon cancer                  | Colon cancer                                   | $8.99 \times 10^{-6}$ | AKT3, BMP7, BST2, CA2, CALD1, CLDN3, COL6A1, COL6A2, CRIP1, EGFR, FN1, FSCN1, GDF15, GJA1, HIST1H2BD, HIST1H4H (includes EG:8365), INSIG1, MCAM, SERPINA3, SERPINE1, STXBP6, TFF3, TPD52L1, TUBB2A                                                                                                                                                                 | 24 |

|                  |                                     |                                     |                       |                                                                                                                                                                                                                                                                                                                                                                                                                                                                                                                                                                                                                                                                                                                                                                                                                                                                                                                                                                                                                                                                                                                                                                                                                                                                                                                                                                                                                                                                                                                                                                             |     |
|------------------|-------------------------------------|-------------------------------------|-----------------------|-----------------------------------------------------------------------------------------------------------------------------------------------------------------------------------------------------------------------------------------------------------------------------------------------------------------------------------------------------------------------------------------------------------------------------------------------------------------------------------------------------------------------------------------------------------------------------------------------------------------------------------------------------------------------------------------------------------------------------------------------------------------------------------------------------------------------------------------------------------------------------------------------------------------------------------------------------------------------------------------------------------------------------------------------------------------------------------------------------------------------------------------------------------------------------------------------------------------------------------------------------------------------------------------------------------------------------------------------------------------------------------------------------------------------------------------------------------------------------------------------------------------------------------------------------------------------------|-----|
| Genetic disorder | Prostatic intraepithelial neoplasia | Prostatic intraepithelial neoplasia | $2.72 \times 10^{-5}$ | <i>ESR1, FHL2, GATA3, GPX3, IGFBP3, KRT7, MUC1, MYL9 (includes EG:10398), PSAT1, TFF3</i>                                                                                                                                                                                                                                                                                                                                                                                                                                                                                                                                                                                                                                                                                                                                                                                                                                                                                                                                                                                                                                                                                                                                                                                                                                                                                                                                                                                                                                                                                   | 10  |
| Genetic disorder | Genetic disorder                    | Genetic disorder                    | $2.73 \times 10^{-5}$ | <i>ABAT, ABCB1, ADA, AGA, AKAP2, AKAP12, AKR1B1, AKR1C2, AKT3, AMMECR1, ANK3, APPBP2, ATXN1, AXL, B2M, BCAS3, BCAT1, BDNF, BIN1, BMP7, BRIP1, BST2, C6ORF97, CA2, CALCR, CALD1, CD24, CDA, CDC42EP3, CDH1, CDH2, CDKN2A, CDS1, CELSR2, CHST6, CLDN3, COCH, COL1A1, COL21A1, COL4A1, COL4A2, COL6A1, COL6A2, CREBBP, CRIP1, CRYAB, CTGF, CXCL12, CYP1B1, CYR61, DFNA5, DKK3, DNAJB4, DNAJC15, ECM1, EFEMP2, EGFR, EGR3, EML1 (includes EG:2009), ENOSF1, EPCAM, ESR1, EXT1, FBN2 (includes EG:2201), FHL2, FN1, FNDC3B, FSCN1, FYN, GATA3, GDF15, GFRA1, GJA1, GNA14, GNAL, GPX3, GREB1, GRHL2, HEG1, HIST1H2BD, HIST1H4H (includes EG:8365), HIST2H2AA3, HMGA1, HMGA2, HNMT, ICAM1, ID4, IGF2BP2, IGFBP3, IGFBP5, IGFBP6, IL18, IL7R, INSIG1, IRS1, ISOC1, KIAA1324, KLF4, KRT7, KRT19, KYNU, LAMB1, LDHB, LEPREL1, LOX, LPCAT1, LPHN2, LXN, MAFB, MAP1B, MCAM, MLLT11, MLPH, MMP1 (includes EG:4312), MPPED2 (includes EG:744), MSLN, MSMB, MSX2, MT1E, MTUS1, MUC1, MYL9 (includes EG:10398), NCOA3, NDN, NEBL, NEFH, NRCAM, NSMAF, OLFM1, ORC5L, PBX1, PDGFC, PDLIM4, PIK3R1, PIK3R3, PLAGL1, PLTP, PSAT1, PSMB9, PTRF, RAB3B, RAC2, RAI14, RAMP3, RASGRP1, RB1, RBM47, RBPMS, RCN1, RET, RNASET2, S100P, SCD, SCHIP1, SCUBE2, SDC2, SELENBP1, SEMA3C, SERPINA3, SERPINB7, SERPINE1, SERPINE2, SGCE, SH3YL1, SIDT1, SLC12A2, SLC12A8, SLC19A2, SLC24A3, SLC27A6, SLC6A14, SNCA, SNRPN, SOX3, SPARC, SRPX, STXBPA6, TACSTD2, TFF1, TFF3, TFPI2, TGFB1, TGFB2, TGM2, TMF1, TNFRSF6B, TPD52L1, TPM2, TUBB2A, TUBB2B, UBB, UCHL1, UGT2B15, VAV3, VIM, WWOX, XBP1, ZNF395</i> | 198 |
| Genetic disorder | Pancreatic adenocarcinoma           | Pancreatic adenocarcinoma           | $3.67 \times 10^{-5}$ | <i>AXL, CYR61, IGFBP3, KRT7, KRT19, MSLN, SERPINE2</i>                                                                                                                                                                                                                                                                                                                                                                                                                                                                                                                                                                                                                                                                                                                                                                                                                                                                                                                                                                                                                                                                                                                                                                                                                                                                                                                                                                                                                                                                                                                      | 7   |
| Genetic disorder | Non-small-cell lung carcinoma       | Non-small-cell lung carcinoma       | $4.92 \times 10^{-5}$ | <i>AKT3, B2M, CDKN2A, EGFR, EPCAM, FN1, FYN, MAFB, MSLN, RB1, RET, TUBB2A</i>                                                                                                                                                                                                                                                                                                                                                                                                                                                                                                                                                                                                                                                                                                                                                                                                                                                                                                                                                                                                                                                                                                                                                                                                                                                                                                                                                                                                                                                                                               | 12  |
| Genetic disorder | Prostatic carcinoma                 | Prostatic carcinoma                 | $5.27 \times 10^{-5}$ | <i>ABAT, AKT3, EGFR, EPCAM, ESR1, FHL2, FYN, GATA3, GDF15, GPX3, IGFBP3, KRT7, MSMB, MUC1, MYL9 (includes EG:10398), PSAT1, RB1, RET, TFF3, TUBB2A</i>                                                                                                                                                                                                                                                                                                                                                                                                                                                                                                                                                                                                                                                                                                                                                                                                                                                                                                                                                                                                                                                                                                                                                                                                                                                                                                                                                                                                                      | 20  |
| Genetic disorder | Prostatic intraepithelial tumor     | Prostatic intraepithelial tumor     | $8.92 \times 10^{-5}$ | <i>FHL2, GATA3, GPX3, IGFBP3, KRT7, MUC1, MYL9 (includes EG:10398), PSAT1, TFF3</i>                                                                                                                                                                                                                                                                                                                                                                                                                                                                                                                                                                                                                                                                                                                                                                                                                                                                                                                                                                                                                                                                                                                                                                                                                                                                                                                                                                                                                                                                                         | 9   |

|                  |                                             |                                             |                       |                                                                                                                       |    |
|------------------|---------------------------------------------|---------------------------------------------|-----------------------|-----------------------------------------------------------------------------------------------------------------------|----|
| Genetic disorder | Lung carcinoma                              | Lung carcinoma                              | $9.52 \times 10^{-5}$ | <i>ABCB1, AKT3, B2M, CDKN2A, CLDN3, EGFR, EPCAM, FN1, FYN, LOX, MAFB, MSLN, RB1, RET, TUBB2A</i>                      | 15 |
| Genetic disorder | Pancreatic carcinoma                        | Pancreatic carcinoma                        | $4.17 \times 10^{-4}$ | <i>AXL, CYR61, IGFBP3, KRT7, KRT19, MSLN, MSX2, SERPINE2</i>                                                          | 8  |
| Genetic disorder | Osteoporosis                                | Osteoporosis                                | $6.49 \times 10^{-4}$ | <i>CA2, CALCR, COL1A1, ESR1, PDLIM4</i>                                                                               | 5  |
| Genetic disorder | Lung cancer                                 | Lung cancer                                 | $8.27 \times 10^{-4}$ | <i>ABCB1, AKT3, B2M, CDH1, CDKN2A, CLDN3, DNAJB4, EGFR, EPCAM, FN1, FYN, LOX, MAFB, MSLN, RB1, RET, S100P, TUBB2A</i> | 18 |
| Genetic disorder | Light chain associated amyloidosis          | Light chain-associated amyloidosis          | $9.96 \times 10^{-4}$ | <i>CXCL12, IGFBP5, RB1, TGFB1</i>                                                                                     | 4  |
| Genetic disorder | Dupuytren contracture                       | Dupuytren contracture                       | $1.20 \times 10^{-3}$ | <i>COL1A1, COL21A1, COL4A1, COL4A2, COL6A1, COL6A2, MMP1 (includes EG:4312)</i>                                       | 7  |
| Genetic disorder | Acinar-cell carcinoma                       | Acinar-cell carcinoma                       | $1.21 \times 10^{-3}$ | <i>CREBBP, FN1, IGFBP5, PIK3R1</i>                                                                                    | 4  |
| Genetic disorder | Serous ovarian carcinoma process            | Serous ovarian carcinoma process            | $1.28 \times 10^{-3}$ | <i>CLDN3, MSLN, MUC1</i>                                                                                              | 3  |
| Genetic disorder | Bethlem myopathy                            | Bethlem myopathy                            | $1.56 \times 10^{-3}$ | <i>COL6A1, COL6A2</i>                                                                                                 | 2  |
| Genetic disorder | Cutis laxa, recessive type 1                | Cutis laxa, recessive type 1                | $1.56 \times 10^{-3}$ | <i>EFEMP2, LOX</i>                                                                                                    | 2  |
| Genetic disorder | Ullrich congenital muscular dystrophy       | Ullrich congenital muscular dystrophy       | $1.56 \times 10^{-3}$ | <i>COL6A1, COL6A2</i>                                                                                                 | 2  |
| Genetic disorder | Nonsyndromic hearing impairment             | Nonsyndromic hearing impairment             | $2.28 \times 10^{-3}$ | <i>COCH, DFNA5, GRHL2</i>                                                                                             | 3  |
| Genetic disorder | Gelatinous drop-like corneal dystrophy      | Gelatinous drop-like corneal dystrophy      | $3.07 \times 10^{-3}$ | <i>TACSTD2, TGFB1</i>                                                                                                 | 2  |
| Genetic disorder | Osteoarthritis                              | Osteoarthritis                              | $6.62 \times 10^{-3}$ | <i>CRYAB, EFEMP2, IL18, MMP1 (includes EG:4312), TFPI2, TGFB1</i>                                                     | 6  |
| Genetic disorder | Congenital central hypoventilation syndrome | Congenital central hypoventilation syndrome | $7.45 \times 10^{-3}$ | <i>BDNF, RET</i>                                                                                                      | 2  |

|                  |                                |                                        |                       |                                                                                                                                                                                                                                                                                                                                                                                                                                                                                                                                   |    |
|------------------|--------------------------------|----------------------------------------|-----------------------|-----------------------------------------------------------------------------------------------------------------------------------------------------------------------------------------------------------------------------------------------------------------------------------------------------------------------------------------------------------------------------------------------------------------------------------------------------------------------------------------------------------------------------------|----|
| Genetic disorder | Progressive supranuclear palsy | Progressive supranuclear palsy         | $9.07 \times 10^{-3}$ | <i>ABAT, SERPINA3, TGM2, UBB</i>                                                                                                                                                                                                                                                                                                                                                                                                                                                                                                  | 4  |
| Genetic disorder | Postmenopausal osteoporosis    | Postmenopausal osteoporosis            | $1.35 \times 10^{-2}$ | <i>CALCR, ESR1</i>                                                                                                                                                                                                                                                                                                                                                                                                                                                                                                                | 2  |
| Cell death       | Cell death                     | Cell death of eukaryotic cells         | $1.33 \times 10^{-8}$ | <i>ABCB1, AKT3, ANKRD1, ANXA1, ATMIN, B2M, BDNF, BMP7, CD24, CDH1, CDH2, CDKN2A, CEACAM6 (includes EG:4680), COL4A2, CRYAB, CTGF, CXCL12, CYR61, DKK3, DNAJC15, DUSP4, EGFR, EMP1, EMP3, ESR1, FHL2, FN1, GDF15, GPX1, HMGA2, ID2, IFI16, IGFBP3, IGFBP5, IGFBP6, IL18, IL7R, LGALS3BP, MSN, MUC1, MYB (includes EG:4602), NCOA3, NUA1, PDZK1, PLAGL1, PRAME (includes EG:23532), RAC2, RB1, RET, S100P, SDC2, SNCA, SPARC, SRPX, TFF3, TGFB1, TGM2, TNFRSF6B, WWOX, XBP1</i>                                                     | 60 |
| Cell death       | Cell death                     | Cell death of cell lines               | $2.32 \times 10^{-8}$ | <i>ABCB1, AKT3, ANKRD1, ATMIN, B2M, BDNF, BMP7, CD24, CDH1, CDKN2A, CEACAM6 (includes EG:4680), CRYAB, CTGF, CXCL12, CYR61, DKK3, DNAJC15, DUSP4, EGFR, EMP1, EMP3, ESR1, FHL2, FN1, GDF15, ID2, IFI16, IGFBP3, IGFBP5, IGFBP6, IL18, LGALS3BP, MSN, MUC1, MYB (includes EG:4602), NCOA3, NUA1, PDZK1, PLAGL1, PRAME (includes EG:23532), RB1, RET, S100P, SDC2, SNCA, SPARC, SRPX, TFF3, TGFB1, TGM2, TNFRSF6B, WWOX, XBP1</i>                                                                                                   | 53 |
| Cell death       | Cell death                     | Cell death of tumor cell lines         | $3.22 \times 10^{-8}$ | <i>ABCB1, AKT3, ANKRD1, ATMIN, B2M, BDNF, BMP7, CD24, CDH1, CDKN2A, CEACAM6 (includes EG:4680), CRYAB, CTGF, CXCL12, CYR61, DKK3, DNAJC15, DUSP4, EGFR, ESR1, FN1, GDF15, IFI16, IGFBP3, IGFBP5, IGFBP6, LGALS3BP, MSN, MUC1, MYB (includes EG:4602), NCOA3, NUA1, PDZK1, PLAGL1, PRAME (includes EG:23532), RB1, RET, SDC2, SNCA, SPARC, SRPX, TFF3, TGFB1, TGM2, TNFRSF6B, WWOX, XBP1</i>                                                                                                                                       | 47 |
| Cell death       | Cell death                     | Cell death                             | $1.20 \times 10^{-7}$ | <i>ABCB1, AKT3, ANKRD1, ANXA1, ATMIN, B2M, BDNF, BMP7, CD24, CDH1, CDH2, CDKN2A, CEACAM6 (includes EG:4680), COL4A2, CREBBP, CRYAB, CTGF, CXCL12, CYR61, DKK3, DNAJC15, DUSP4, EGFR, EIF5A, EMP1, EMP3, ESR1, FHL2, FN1, GDF15, GPX1, GSTP1, HMGA2, ICAM2, ID2, IFI16, IGFBP3, IGFBP5, IGFBP6, IL18, IL7R, LGALS3BP, MSN, MUC1, MYB (includes EG:4602), NCOA3, NUA1, PDZK1, PLAGL1, PRAME (includes EG:23532), RAC2, RB1, RET, S100P, SDC2, SNCA, SPARC, SRPX, TFF1, TFF3, TGFB1, TGM2, TNFRSF6B, TPD52L1, WWOX, XBP1, ZNF443</i> | 67 |
| Cell death       | Cell death                     | Cell death of breast cancer cell lines | $1.18 \times 10^{-4}$ | <i>B2M, CDH1, CTGF, CYR61, DNAJC15, DUSP4, EGFR, ESR1, FN1, IGFBP3, IGFBP5, MUC1, NCOA3, TGFB1, XBP1</i>                                                                                                                                                                                                                                                                                                                                                                                                                          | 15 |
| Cell death       | Cell death                     | Cell death of bone cancer cell lines   | $9.31 \times 10^{-4}$ | <i>ATMIN, CDH1, CDKN2A, DKK3, IGFBP5, PLAGL1, SDC2</i>                                                                                                                                                                                                                                                                                                                                                                                                                                                                            | 7  |

|            |            |                                         |                       |                                                                                                                                                                                                                                                                                                                                                                                                                                                                                 |    |
|------------|------------|-----------------------------------------|-----------------------|---------------------------------------------------------------------------------------------------------------------------------------------------------------------------------------------------------------------------------------------------------------------------------------------------------------------------------------------------------------------------------------------------------------------------------------------------------------------------------|----|
| Cell death | Cell death | Cell death of normal cells              | $1.23 \times 10^{-3}$ | <i>ANXA1, BMP7, CDH1, CDH2, CDKN2A, COL4A2, CRYAB, CTGF, CXCL12, EGFR, FN1, GPX1, IL18, IL7R, RAC2, RB1, SNCA, TGFB1, TNFRSF6B</i>                                                                                                                                                                                                                                                                                                                                              | 19 |
| Cell death | Cell death | Cell death of neuroblastoma cell lines  | $1.28 \times 10^{-2}$ | <i>BDNF, IGFBP3, IGFBP5, RET, SNCA, TGFB1</i>                                                                                                                                                                                                                                                                                                                                                                                                                                   | 6  |
| Cell death | Apoptosis  | Apoptosis of tumor cell lines           | $1.31 \times 10^{-7}$ | <i>AKT3, ANKRD1, ATMIN, B2M, BMP7, CD24, CDH1, CDKN2A, CEACAM6 (includes EG:4680), CRYAB, CTGF, CXCL12, CYR61, DKK3, DNAJC15, DUSP4, EGFR, ESR1, FN1, GDF15, IFI16, IGFBP3, IGFBP5, IGFBP6, LGALS3BP, MUC1, MYB (includes EG:4602), NCOA3, PLAGL1, PRAME (includes EG:23532), RB1, RET, SDC2, SPARC, SRPX, TFF3, TGFB1, TGM2, TNFRSF6B, WWOX, XBP1</i>                                                                                                                          | 41 |
| Cell death | Apoptosis  | Apoptosis of eukaryotic cells           | $1.34 \times 10^{-7}$ | <i>AKT3, ANKRD1, ANXA1, ATMIN, B2M, BMP7, CD24, CDH1, CDH2, CDKN2A, CEACAM6 (includes EG:4680), COL4A2, CRYAB, CTGF, CXCL12, CYR61, DKK3, DNAJC15, DUSP4, EGFR, ESR1, FHL2, FN1, GDF15, HMGA2, ID2, IFI16, IGFBP3, IGFBP5, IGFBP6, IL18, IL7R, LGALS3BP, MUC1, MYB (includes EG:4602), NCOA3, PLAGL1, PRAME (includes EG:23532), RAC2, RB1, RET, SDC2, SNCA, SPARC, SRPX, TFF3, TGFB1, TGM2, TNFRSF6B, WWOX, XBP1</i>                                                           | 51 |
| Cell death | Apoptosis  | Apoptosis                               | $3.98 \times 10^{-7}$ | <i>AKT3, ANKRD1, ANXA1, ATMIN, B2M, BMP7, CD24, CDH1, CDH2, CDKN2A, CEACAM6 (includes EG:4680), COL4A2, CREBBP, CRYAB, CTGF, CXCL12, CYR61, DKK3, DNAJC15, DUSP4, EGFR, EIF5A, ESR1, FHL2, FN1, GDF15, GPX1, GSTP1, HMGA2, ICAM2, ID2, IFI16, IGFBP3, IGFBP5, IGFBP6, IL18, IL7R, LGALS3BP, MUC1, MYB (includes EG:4602), NCOA3, PLAGL1, PRAME (includes EG:23532), RAC2, RB1, RET, SDC2, SNCA, SPARC, SRPX, TFF1, TFF3, TGFB1, TGM2, TNFRSF6B, TPD52L1, WWOX, XBP1, ZNF443</i> | 59 |
| Cell death | Apoptosis  | Apoptosis of cell lines                 | $5.22 \times 10^{-7}$ | <i>AKT3, ANKRD1, ATMIN, B2M, BMP7, CD24, CDH1, CDKN2A, CEACAM6 (includes EG:4680), CRYAB, CTGF, CXCL12, CYR61, DKK3, DNAJC15, DUSP4, EGFR, ESR1, FHL2, FN1, GDF15, ID2, IFI16, IGFBP3, IGFBP5, IGFBP6, IL18, LGALS3BP, MUC1, MYB (includes EG:4602), NCOA3, PLAGL1, PRAME (includes EG:23532), RB1, RET, SDC2, SPARC, SRPX, TFF3, TGFB1, TGM2, TNFRSF6B, WWOX, XBP1</i>                                                                                                         | 44 |
| Cell death | Apoptosis  | Apoptosis of breast cancer cell lines   | $1.09 \times 10^{-4}$ | <i>B2M, CDH1, CTGF, CYR61, DUSP4, EGFR, ESR1, FN1, IGFBP3, IGFBP5, MUC1, NCOA3, TGFB1, XBP1</i>                                                                                                                                                                                                                                                                                                                                                                                 | 14 |
| Cell death | Apoptosis  | Apoptosis of normal cells               | $9.54 \times 10^{-4}$ | <i>ANXA1, BMP7, CDH1, CDH2, CDKN2A, COL4A2, CRYAB, CTGF, CXCL12, EGFR, FN1, IL7R, RAC2, RB1, SNCA, TGFB1, TNFRSF6B</i>                                                                                                                                                                                                                                                                                                                                                          | 17 |
| Cell death | Apoptosis  | Apoptosis of prostate cancer cell lines | $1.44 \times 10^{-3}$ | <i>BMP7, CDKN2A, DKK3, EGFR, GDF15, IGFBP3, IGFBP5, NCOA3</i>                                                                                                                                                                                                                                                                                                                                                                                                                   | 8  |

|            |                |                                        |                       |                                                                                                                                                              |    |
|------------|----------------|----------------------------------------|-----------------------|--------------------------------------------------------------------------------------------------------------------------------------------------------------|----|
| Cell death | Apoptosis      | Apoptosis of epithelial cells          | $1.44 \times 10^{-3}$ | <i>CDH1, CRYAB, EGFR, FN1, RB1, TGFB1</i>                                                                                                                    | 6  |
| Cell death | Apoptosis      | Apoptosis of bone cancer cell lines    | $1.75 \times 10^{-3}$ | <i>ATMIN, CDH1, CDKN2A, IGFBP5, PLAGL1, SDC2</i>                                                                                                             | 6  |
| Cell death | Apoptosis      | Apoptosis of t lymphocytes             | $2.71 \times 10^{-3}$ | <i>CDKN2A, CXCL12, IL7R, RAC2, TGFB1, TNFRSF6B</i>                                                                                                           | 6  |
| Cell death | Apoptosis      | Apoptosis of carcinoma cell lines      | $4.04 \times 10^{-3}$ | <i>AKT3, CDKN2A, DNAJC15, IGFBP3, IGFBP6, TGFB1</i>                                                                                                          | 6  |
| Cell death | Apoptosis      | Apoptosis of glomerular cells          | $7.45 \times 10^{-3}$ | <i>CTGF, TGFB1</i>                                                                                                                                           | 2  |
| Cell death | Apoptosis      | Apoptosis of lung cancer cell lines    | $9.08 \times 10^{-3}$ | <i>AKT3, CDKN2A, IGFBP3, IGFBP6, RB1, WWOX</i>                                                                                                               | 6  |
| Cell death | Apoptosis      | Apoptosis of embryonic cells           | $1.03 \times 10^{-2}$ | <i>BMP7, TNFRSF6B</i>                                                                                                                                        | 2  |
| Cell death | Apoptosis      | Apoptosis of bladder cancer cell lines | $1.71 \times 10^{-2}$ | <i>EGFR, IFI16</i>                                                                                                                                           | 2  |
| Cell death | Survival       | Survival of cell lines                 | $2.69 \times 10^{-4}$ | <i>ABCB1, AXL, BDNF, CA2, CDH1, CDKN2A, CLDN3, CXCL12, EGFR, HMGA1, ID2, IGFBP3, KRT19, MCAM, NUA1, PPP1R3D, PTPRK, S100P, SNCA, TGFB1, TGM2</i>             | 21 |
| Cell death | Survival       | Survival of eukaryotic cells           | $6.12 \times 10^{-4}$ | <i>ABCB1, AXL, BDNF, CA2, CDH1, CDKN2A, CLDN3, CXCL12, EGFR, FN1, HMGA1, ICAM1, ID2, IGFBP3, KRT19, MCAM, NUA1, PPP1R3D, PTPRK, S100P, SNCA, TGFB1, TGM2</i> | 23 |
| Cell death | Survival       | Survival of tumor cell lines           | $6.95 \times 10^{-4}$ | <i>AXL, BDNF, CA2, CDH1, CDKN2A, CLDN3, CXCL12, EGFR, HMGA1, ID2, IGFBP3, KRT19, MCAM, NUA1, PPP1R3D, PTPRK, SNCA, TGM2</i>                                  | 18 |
| Cell death | Survival       | Survival of neuroblastoma cell lines   | $1.74 \times 10^{-3}$ | <i>BDNF, SNCA, TGM2</i>                                                                                                                                      | 3  |
| Cell death | Survival       | Survival of breast cancer cell lines   | $3.59 \times 10^{-3}$ | <i>CA2, HMGA1, ID2, IGFBP3, KRT19</i>                                                                                                                        | 5  |
| Cell death | Anoikis        | Anoikis of dermal cells                | $5.28 \times 10^{-4}$ | <i>EGFR, FN1</i>                                                                                                                                             | 2  |
| Cell death | Cell viability | Cell viability of eukaryotic cells     | $9.47 \times 10^{-4}$ | <i>CDH2, CXCL12, FKBP1B, FN1, GDF15, GSTP1, IGFBP3, PBX1, SNCA, STC1</i>                                                                                     | 10 |
| Cell death | Cell viability | Cell viability of cell lines           | $1.23 \times 10^{-2}$ | <i>CDH2, FKBP1B, GDF15, GSTP1, PBX1, SNCA, STC1</i>                                                                                                          | 7  |

|                                     |                               |                                                |                       |                                                                                                                                                                                                                                             |    |
|-------------------------------------|-------------------------------|------------------------------------------------|-----------------------|---------------------------------------------------------------------------------------------------------------------------------------------------------------------------------------------------------------------------------------------|----|
| Cell death                          | Cell viability                | Cell viability of tumor cell lines             | $1.51 \times 10^{-2}$ | <i>CDH2, GDF15, GSTP1, PBX1, SNCA, STC1</i>                                                                                                                                                                                                 | 6  |
| Cell death                          | Activation-induced cell death | Activation-induced cell death of T lymphocytes | $1.35 \times 10^{-2}$ | <i>RAC2, TGFB1</i>                                                                                                                                                                                                                          | 2  |
| Cell-cell signaling and interaction | Adhesion                      | Adhesion of cells                              | $2.75 \times 10^{-8}$ | <i>ANXA1, ANXA9, BMP7, CDH1, CDH2, CTGF, CXCL12, CYR61, DKK3, EGFR, EPCAM, FN1, FXYD5, ICAM1, ICAM2, IL18, IL32, LAMB1, LGALS3BP, LOXL2, MCAM, MPZL2, PLTP, PTPRK, RASGRP1, RLN2, RRAS, SDC2, SERPINE1, TGFB1, TGFB11, TGFB1, TGM2, ZYX</i> | 34 |
| Cell-cell signaling and interaction | Adhesion                      | Adhesion of eukaryotic cells                   | $6.91 \times 10^{-7}$ | <i>ANXA1, BMP7, CDH1, CDH2, CTGF, CXCL12, CYR61, DKK3, EGFR, EPCAM, FN1, FXYD5, ICAM1, ICAM2, LGALS3BP, MCAM, PLTP, RASGRP1, RLN2, RRAS, SDC2, TGFB1, TGM2</i>                                                                              | 23 |
| Cell-cell signaling and interaction | Adhesion                      | Adhesion of cell lines                         | $6.27 \times 10^{-6}$ | <i>ANXA1, BMP7, CDH1, CDH2, CXCL12, DKK3, EGFR, FN1, FXYD5, ICAM1, LGALS3BP, RLN2, RRAS, SDC2, TGFB1, TGM2</i>                                                                                                                              | 16 |
| Cell-cell signaling and interaction | Adhesion                      | Adhesion of cancer cells                       | $1.34 \times 10^{-5}$ | <i>CDH2, CXCL12, EGFR, FN1, ICAM1, MCAM</i>                                                                                                                                                                                                 | 6  |
| Cell-cell signaling and interaction | Adhesion                      | Adhesion of tumor cell lines                   | $8.77 \times 10^{-5}$ | <i>ANXA1, BMP7, CDH1, CDH2, CXCL12, DKK3, EGFR, FN1, FXYD5, ICAM1, RLN2, SDC2</i>                                                                                                                                                           | 12 |
| Cell-cell signaling and interaction | Adhesion                      | Adhesion of normal cells                       | $1.37 \times 10^{-4}$ | <i>ANXA1, CDH1, CDH2, CTGF, CXCL12, CYR61, EPCAM, FN1, ICAM1, ICAM2, PLTP, RASGRP1, RLN2, TGFB1</i>                                                                                                                                         | 14 |
| Cell-cell signaling and interaction | Adhesion                      | Adhesion of lymphocytes                        | $1.07 \times 10^{-3}$ | <i>CXCL12, FN1, ICAM1, ICAM2, RASGRP1, TGFB1</i>                                                                                                                                                                                            | 6  |
| Cell-cell signaling and interaction | Adhesion                      | Adhesion of leukocytes                         | $1.19 \times 10^{-3}$ | <i>ANXA1, CXCL12, FN1, ICAM1, ICAM2, PLTP, RASGRP1, RLN2, TGFB1</i>                                                                                                                                                                         | 9  |
| Cell-cell signaling and interaction | Adhesion                      | Adhesion of T lymphocytes                      | $2.12 \times 10^{-3}$ | <i>CXCL12, FN1, ICAM1, ICAM2, RASGRP1</i>                                                                                                                                                                                                   | 5  |
| Cell-cell signaling and interaction | Adhesion                      | Adhesion of epithelial cells                   | $3.18 \times 10^{-3}$ | <i>CDH1, EPCAM, FN1, ICAM1</i>                                                                                                                                                                                                              | 4  |
| Cell-cell signaling and interaction | Adhesion                      | Adhesion of endothelial cells                  | $4.35 \times 10^{-3}$ | <i>CDH2, FN1, ICAM1, ICAM2, TGFB1</i>                                                                                                                                                                                                       | 5  |

|                                     |          |                                     |                       |                                                                                                                                                                        |    |
|-------------------------------------|----------|-------------------------------------|-----------------------|------------------------------------------------------------------------------------------------------------------------------------------------------------------------|----|
| Cell-cell signaling and interaction | Adhesion | Adhesion of connective tissue cells | $5.41 \times 10^{-3}$ | <i>CDH2, CTGF, ICAM1</i>                                                                                                                                               | 3  |
| Cell-cell signaling and interaction | Adhesion | Adhesion of embryonic cell lines    | $5.41 \times 10^{-3}$ | <i>FN1, ICAM1, RRAS</i>                                                                                                                                                | 3  |
| Cell-cell signaling and interaction | Adhesion | Adhesion of endothelial cell lines  | $5.68 \times 10^{-3}$ | <i>ANXA1, CDH2, CXCL12, ICAM1, TGFB1</i>                                                                                                                               | 5  |
| Cell-cell signaling and interaction | Adhesion | Adhesion of lung cancer cell lines  | $7.45 \times 10^{-3}$ | <i>CXCL12, ICAM1</i>                                                                                                                                                   | 2  |
| Cell-cell signaling and interaction | Adhesion | Adhesion of leukemia cell lines     | $1.10 \times 10^{-2}$ | <i>CDH1, FN1, ICAM1, RLN2</i>                                                                                                                                          | 4  |
| Cell-cell signaling and interaction | Adhesion | Adhesion of leukocyte cell lines    | $1.34 \times 10^{-2}$ | <i>ANXA1, TGFB1, TGM2</i>                                                                                                                                              | 3  |
| Cell-cell signaling and interaction | Adhesion | Adhesion of melanoma cells          | $1.35 \times 10^{-2}$ | <i>CDH2, MCAM</i>                                                                                                                                                      | 2  |
| Cell-cell signaling and interaction | Adhesion | Adhesion of keratinocytes           | $1.71 \times 10^{-2}$ | <i>CDH1, FN1</i>                                                                                                                                                       | 2  |
| Cell-cell signaling and interaction | Binding  | Binding of cells                    | $8.98 \times 10^{-6}$ | <i>AXL, CALCR, CD24, CEACAM5 (includes EG:1048), CXADR, CXCL12, FN1, GFRA1, ICAM1, IGFBP3, IGFBP5, LGALS3BP, MSN, OXTR, PIK3R1, SDC2, SERPINE1, SPARC, TGFB1, TGM2</i> | 20 |
| Cell-cell signaling and interaction | Binding  | Binding of cell lines               | $1.07 \times 10^{-5}$ | <i>AXL, CALCR, CD24, CEACAM5 (includes EG:1048), CXADR, CXCL12, FN1, ICAM1, IGFBP3, IGFBP5, LGALS3BP, OXTR, PIK3R1, SDC2, SERPINE1, TGFB1</i>                          | 16 |
| Cell-cell signaling and interaction | Binding  | Binding of eukaryotic cells         | $1.52 \times 10^{-5}$ | <i>AXL, CALCR, CD24, CEACAM5 (includes EG:1048), CXADR, CXCL12, FN1, GFRA1, ICAM1, IGFBP3, IGFBP5, LGALS3BP, MSN, OXTR, PIK3R1, SDC2, SERPINE1, SPARC, TGFB1</i>       | 19 |
| Cell-cell signaling and interaction | Binding  | Binding of fibroblasts              | $3.16 \times 10^{-5}$ | <i>IGFBP3, LGALS3BP, SDC2, SPARC</i>                                                                                                                                   | 4  |

|                                     |            |                                     |                       |                                                                                                                                                                                                                                                                                                                         |    |
|-------------------------------------|------------|-------------------------------------|-----------------------|-------------------------------------------------------------------------------------------------------------------------------------------------------------------------------------------------------------------------------------------------------------------------------------------------------------------------|----|
| Cell-cell signaling and interaction | Binding    | Binding of tumor cell lines         | $1.11 \times 10^{-3}$ | <i>CEACAM5</i> (includes <i>EG:1048</i> ), <i>CXADR</i> , <i>CXCL12</i> , <i>IGFBP5</i> , <i>LGALS3BP</i> , <i>OXTR</i> , <i>PIK3R1</i> , <i>SERPINE1</i> , <i>TGFB1</i>                                                                                                                                                | 9  |
| Cell-cell signaling and interaction | Binding    | Binding of normal cells             | $2.35 \times 10^{-3}$ | <i>CD24</i> , <i>CXCL12</i> , <i>FN1</i> , <i>ICAM1</i> , <i>IGFBP3</i> , <i>LGALS3BP</i> , <i>MSN</i> , <i>SDC2</i> , <i>SERPINE1</i> , <i>SPARC</i>                                                                                                                                                                   | 10 |
| Cell-cell signaling and interaction | Binding    | Binding of breast cancer cell lines | $5.41 \times 10^{-3}$ | <i>IGFBP5</i> , <i>OXTR</i> , <i>SERPINE1</i>                                                                                                                                                                                                                                                                           | 3  |
| Cell-cell signaling and interaction | Binding    | Binding of blood platelets          | $1.18 \times 10^{-2}$ | <i>CD24</i> , <i>FN1</i> , <i>ICAM1</i>                                                                                                                                                                                                                                                                                 | 3  |
| Cell-cell signaling and interaction | Binding    | Binding of endothelial cell lines   | $1.43 \times 10^{-2}$ | <i>AXL</i> , <i>FN1</i> , <i>ICAM1</i> , <i>PIK3R1</i>                                                                                                                                                                                                                                                                  | 4  |
| Cell-cell signaling and interaction | Binding    | Binding of cancer cells             | $1.71 \times 10^{-2}$ | <i>CD24</i> , <i>GFRA1</i>                                                                                                                                                                                                                                                                                              | 2  |
| Cell-cell signaling and interaction | Activation | Activation of cells                 | $3.16 \times 10^{-5}$ | <i>ADA</i> , <i>AREG</i> , <i>B2M</i> , <i>CD24</i> , <i>CDH1</i> , <i>CEACAM5</i> (includes <i>EG:1048</i> ), <i>CXCL12</i> , <i>EGFR</i> , <i>FN1</i> , <i>ICAM1</i> , <i>ICAM2</i> , <i>MMP1</i> (includes <i>EG:4312</i> ), <i>NUAK1</i> , <i>RLN2</i> , <i>SDC2</i> , <i>TGFB1</i> , <i>TGM2</i> , <i>TNFRSF6B</i> | 18 |
| Cell-cell signaling and interaction | Activation | Activation of cell lines            | $4.34 \times 10^{-4}$ | <i>B2M</i> , <i>CDH1</i> , <i>MMP1</i> (includes <i>EG:4312</i> ), <i>NUAK1</i> , <i>TGFB1</i> , <i>TGM2</i> , <i>TNFRSF6B</i>                                                                                                                                                                                          | 7  |
| Cell-cell signaling and interaction | Activation | Activation of eukaryotic cells      | $4.93 \times 10^{-4}$ | <i>ADA</i> , <i>AREG</i> , <i>B2M</i> , <i>CDH1</i> , <i>CEACAM5</i> (includes <i>EG:1048</i> ), <i>CXCL12</i> , <i>EGFR</i> , <i>FN1</i> , <i>MMP1</i> (includes <i>EG:4312</i> ), <i>NUAK1</i> , <i>RLN2</i> , <i>SDC2</i> , <i>TGFB1</i> , <i>TGM2</i> , <i>TNFRSF6B</i>                                             | 15 |
| Cell-cell signaling and interaction | Activation | Activation of muscle cells          | $1.56 \times 10^{-3}$ | <i>TGFB1</i> , <i>TGM2</i>                                                                                                                                                                                                                                                                                              | 2  |
| Cell-cell signaling and interaction | Activation | Activation of kidney cell lines     | $1.03 \times 10^{-2}$ | <i>TGFB1</i> , <i>TGM2</i>                                                                                                                                                                                                                                                                                              | 2  |
| Cell-cell signaling and interaction | Activation | Activation of leukocyte cell lines  | $1.35 \times 10^{-2}$ | <i>B2M</i> , <i>TNFRSF6B</i>                                                                                                                                                                                                                                                                                            | 2  |
| Cell-cell signaling and interaction | Activation | Activation of epithelial cells      | $1.71 \times 10^{-2}$ | <i>AREG</i> , <i>EGFR</i>                                                                                                                                                                                                                                                                                               | 2  |

|                                     |                           |                                                      |                       |                                                     |   |
|-------------------------------------|---------------------------|------------------------------------------------------|-----------------------|-----------------------------------------------------|---|
| Cell–cell signaling and interaction | Attachment                | Attachment of eukaryotic cells                       | $1.80 \times 10^{-4}$ | <i>EGFR, FN1, SERPINE1, TFPI2, TGFB1, TGFB1</i>     | 6 |
| Cell–cell signaling and interaction | Attachment                | Attachment of fibroblasts                            | $1.56 \times 10^{-3}$ | <i>FN1, TGFB1</i>                                   | 2 |
| Cell–cell signaling and interaction | Attachment                | Attachment of cell lines                             | $2.76 \times 10^{-3}$ | <i>EGFR, FN1, SERPINE1, TGFB1</i>                   | 4 |
| Cell–cell signaling and interaction | Attachment                | Attachment of normal cells                           | $6.46 \times 10^{-3}$ | <i>FN1, TFPI2, TGFB1</i>                            | 3 |
| Cell–cell signaling and interaction | Attachment                | Attachment of breast cancer cell lines               | $7.45 \times 10^{-3}$ | <i>EGFR, SERPINE1</i>                               | 2 |
| Cell–cell signaling and interaction | Attachment                | Attachment of tumor cell lines                       | $8.90 \times 10^{-3}$ | <i>EGFR, SERPINE1, TGFB1</i>                        | 3 |
| Cell–cell signaling and interaction | Contact growth inhibition | Contact growth inhibition                            | $1.99 \times 10^{-4}$ | <i>BMP7, CD24, CDH1, CDKN2A, EGFR, IFI16, TGFB1</i> | 7 |
| Cell–cell signaling and interaction | Contact growth inhibition | Contact growth inhibition of eukaryotic cells        | $6.87 \times 10^{-4}$ | <i>BMP7, CD24, CDH1, EGFR, IFI16, TGFB1</i>         | 6 |
| Cell–cell signaling and interaction | Contact growth inhibition | Contact growth inhibition of cell lines              | $2.12 \times 10^{-3}$ | <i>BMP7, CD24, CDH1, EGFR, IFI16</i>                | 5 |
| Cell–cell signaling and interaction | Contact growth inhibition | Contact growth inhibition of tumor cell lines        | $5.30 \times 10^{-3}$ | <i>BMP7, CD24, CDH1, IFI16</i>                      | 4 |
| Cell–cell signaling and interaction | Contact growth inhibition | Contact growth inhibition of colon cancer cell lines | $1.03 \times 10^{-2}$ | <i>CD24, CDH1</i>                                   | 2 |
| Cell–cell signaling and interaction | Formation                 | Formation of cell-matrix contacts                    | $1.56 \times 10^{-3}$ | <i>CDH1, FN1</i>                                    | 2 |
| Cell–cell signaling and interaction | Quantity                  | Quantity of intercellular junctions                  | $1.56 \times 10^{-3}$ | <i>CDH1, GDF15</i>                                  | 2 |

|                                     |                |                                 |                       |                                                                                                                                                                                                                                             |    |
|-------------------------------------|----------------|---------------------------------|-----------------------|---------------------------------------------------------------------------------------------------------------------------------------------------------------------------------------------------------------------------------------------|----|
| Cell-cell signaling and interaction | Induction      | Induction of T lymphocytes      | $3.07 \times 10^{-3}$ | <i>IL18, MUC1</i>                                                                                                                                                                                                                           | 2  |
| Cell-cell signaling and interaction | Association    | Association of cells            | $7.45 \times 10^{-3}$ | <i>IGFBP3, TGFB1</i>                                                                                                                                                                                                                        | 2  |
| Cell-cell signaling and interaction | Co-stimulation | Co-stimulation of T lymphocytes | $1.35 \times 10^{-2}$ | <i>CD24, FN1</i>                                                                                                                                                                                                                            | 2  |
| Cell-cell signaling and interaction | Detachment     | Detachment of eukaryotic cells  | $1.52 \times 10^{-2}$ | <i>ANXA1, FN1, IGFBP3</i>                                                                                                                                                                                                                   | 3  |
| Cell-cell signaling and interaction | Communication  | Communication of cells          | $1.52 \times 10^{-2}$ | <i>AREG, BST2, CEACAM6 (includes EG:4680), ESR1, GDF15, GJA1, IL18, STC1, TFAP2C, WNT5A, ZYX</i>                                                                                                                                            | 11 |
| Tissue development                  | Adhesion       | Adhesion of cells               | $2.75 \times 10^{-8}$ | <i>ANXA1, ANXA9, BMP7, CDH1, CDH2, CTGF, CXCL12, CYR61, DKK3, EGFR, EPCAM, FN1, FXYD5, ICAM1, ICAM2, IL18, IL32, LAMB1, LGALS3BP, LOXL2, MCAM, MPZL2, PLTP, PTPRK, RASGRP1, RLN2, RRAS, SDC2, SERPINE1, TGFB1, TGFB11, TGFB1, TGM2, ZYX</i> | 34 |
| Tissue development                  | Adhesion       | Adhesion of eukaryotic cells    | $6.91 \times 10^{-7}$ | <i>ANXA1, BMP7, CDH1, CDH2, CTGF, CXCL12, CYR61, DKK3, EGFR, EPCAM, FN1, FXYD5, ICAM1, ICAM2, LGALS3BP, MCAM, PLTP, RASGRP1, RLN2, RRAS, SDC2, TGFB1, TGM2</i>                                                                              | 23 |
| Tissue development                  | Adhesion       | Adhesion of cell lines          | $6.27 \times 10^{-6}$ | <i>ANXA1, BMP7, CDH1, CDH2, CXCL12, DKK3, EGFR, FN1, FXYD5, ICAM1, LGALS3BP, RLN2, RRAS, SDC2, TGFB1, TGM2</i>                                                                                                                              | 16 |
| Tissue development                  | Adhesion       | Adhesion of cancer cells        | $1.34 \times 10^{-5}$ | <i>CDH2, CXCL12, EGFR, FN1, ICAM1, MCAM</i>                                                                                                                                                                                                 | 6  |
| Tissue development                  | Adhesion       | Adhesion of tumor cell lines    | $8.77 \times 10^{-5}$ | <i>ANXA1, BMP7, CDH1, CDH2, CXCL12, DKK3, EGFR, FN1, FXYD5, ICAM1, RLN2, SDC2</i>                                                                                                                                                           | 12 |
| Tissue development                  | Adhesion       | Adhesion of normal cells        | $1.37 \times 10^{-4}$ | <i>ANXA1, CDH1, CDH2, CTGF, CXCL12, CYR61, EPCAM, FN1, ICAM1, ICAM2, PLTP, RASGRP1, RLN2, TGFB1</i>                                                                                                                                         | 14 |
| Tissue development                  | Adhesion       | Adhesion of lymphocytes         | $1.07 \times 10^{-3}$ | <i>CXCL12, FN1, ICAM1, ICAM2, RASGRP1, TGFB1</i>                                                                                                                                                                                            | 6  |
| Tissue development                  | Adhesion       | Adhesion of leukocytes          | $1.19 \times 10^{-3}$ | <i>ANXA1, CXCL12, FN1, ICAM1, ICAM2, PLTP, RASGRP1, RLN2, TGFB1</i>                                                                                                                                                                         | 9  |
| Tissue development                  | Adhesion       | Adhesion of T lymphocytes       | $2.12 \times 10^{-3}$ | <i>CXCL12, FN1, ICAM1, ICAM2, RASGRP1</i>                                                                                                                                                                                                   | 5  |
| Tissue development                  | Adhesion       | Adhesion of epithelial cells    | $3.18 \times 10^{-3}$ | <i>CDH1, EPCAM, FN1, ICAM1</i>                                                                                                                                                                                                              | 4  |

|                    |             |                                        |                       |                                                                                |   |
|--------------------|-------------|----------------------------------------|-----------------------|--------------------------------------------------------------------------------|---|
| Tissue development | Adhesion    | Adhesion of endothelial cells          | $4.35 \times 10^{-3}$ | <i>CDH2, FN1, ICAM1, ICAM2, TGFB1</i>                                          | 5 |
| Tissue development | Adhesion    | Adhesion of connective tissue cells    | $5.41 \times 10^{-3}$ | <i>CDH2, CTGF, ICAM1</i>                                                       | 3 |
| Tissue development | Adhesion    | Adhesion of embryonic cell lines       | $5.41 \times 10^{-3}$ | <i>FN1, ICAM1, RRAS</i>                                                        | 3 |
| Tissue development | Adhesion    | Adhesion of endothelial cell lines     | $5.68 \times 10^{-3}$ | <i>ANXA1, CDH2, CXCL12, ICAM1, TGFB1</i>                                       | 5 |
| Tissue development | Adhesion    | Adhesion of lung cancer cell lines     | $7.45 \times 10^{-3}$ | <i>CXCL12, ICAM1</i>                                                           | 2 |
| Tissue development | Adhesion    | Adhesion of leukemia cell lines        | $1.10 \times 10^{-2}$ | <i>CDH1, FN1, ICAM1, RLN2</i>                                                  | 4 |
| Tissue development | Adhesion    | Adhesion of leukocyte cell lines       | $1.34 \times 10^{-2}$ | <i>ANXA1, TGFB1, TGM2</i>                                                      | 3 |
| Tissue development | Adhesion    | Adhesion of melanoma cells             | $1.35 \times 10^{-2}$ | <i>CDH2, MCAM</i>                                                              | 2 |
| Tissue development | Adhesion    | Adhesion of keratinocytes              | $1.71 \times 10^{-2}$ | <i>CDH1, FN1</i>                                                               | 2 |
| Tissue development | Aggregation | Aggregation of tumor cell lines        | $4.71 \times 10^{-4}$ | <i>BMP7, CDH1, CEACAM5 (includes EG:1048), ICAM1, TGFB1</i>                    | 5 |
| Tissue development | Aggregation | Aggregation of tumor cells             | $1.56 \times 10^{-3}$ | <i>CDH2, CEACAM5 (includes EG:1048)</i>                                        | 2 |
| Tissue development | Aggregation | Aggregation of cells                   | $2.42 \times 10^{-3}$ | <i>BMP7, CDH1, CDH2, CEACAM5 (includes EG:1048), EGFR, EPCAM, ICAM1, TGFB1</i> | 8 |
| Tissue development | Aggregation | Aggregation of lymphoma cell lines     | $5.04 \times 10^{-3}$ | <i>ICAM1, TGFB1</i>                                                            | 2 |
| Tissue development | Aggregation | Aggregation of colon cancer cell lines | $7.45 \times 10^{-3}$ | <i>CDH1, CEACAM5 (includes EG:1048)</i>                                        | 2 |
| Tissue development | Aggregation | Aggregation of fibroblast cell lines   | $7.45 \times 10^{-3}$ | <i>CDH2, EPCAM</i>                                                             | 2 |
| Tissue development | Formation   | Formation of endothelial tube          | $2.37 \times 10^{-3}$ | <i>COL4A1, FN1, SERPINE1, TGFB1</i>                                            | 4 |

|                     |                            |                                      |                       |                                                                                                                            |    |
|---------------------|----------------------------|--------------------------------------|-----------------------|----------------------------------------------------------------------------------------------------------------------------|----|
| Cell morphology     | Morphology                 | Morphology of eukaryotic cells       | $4.26 \times 10^{-7}$ | <i>BMP7, CDH1, CDKN2A, DKK3, EGFR, FN1, FYN, GDF15, IGFBP3, IL18, PEG10, PLAGL1, RB1, SDC2, SERPINE1, TGFB1, VIM</i>       | 17 |
| Cell morphology     | Morphology                 | Morphology of cells                  | $6.84 \times 10^{-7}$ | <i>BMP7, CDH1, CDKN2A, DKK3, EGFR, FN1, FYN, GDF15, IGFBP3, IL18, MUC1, PEG10, PLAGL1, RB1, SDC2, SERPINE1, TGFB1, VIM</i> | 18 |
| Cell morphology     | Morphology                 | Morphology of cell lines             | $3.86 \times 10^{-6}$ | <i>BMP7, CDH1, CDKN2A, DKK3, EGFR, FYN, GDF15, IGFBP3, PEG10, RB1, SDC2, SERPINE1, TGFB1, VIM</i>                          | 14 |
| Cell morphology     | Morphology                 | Morphology of tumor cell lines       | $1.57 \times 10^{-4}$ | <i>BMP7, CDH1, CDKN2A, DKK3, EGFR, GDF15, RB1, SDC2, VIM</i>                                                               | 9  |
| Cell morphology     | Morphology                 | Morphology of bone cancer cell lines | $5.04 \times 10^{-3}$ | <i>DKK3, RB1</i>                                                                                                           | 2  |
| Cell morphology     | Morphology                 | Morphology of cancer cells           | $1.03 \times 10^{-2}$ | <i>EGFR, PLAGL1</i>                                                                                                        | 2  |
| Cell morphology     | Morphology                 | Morphology of embryonic cell lines   | $1.35 \times 10^{-2}$ | <i>IGFBP3, SERPINE1</i>                                                                                                    | 2  |
| Cell morphology     | Morphology                 | Morphology of gonadal cell lines     | $1.35 \times 10^{-2}$ | <i>PEG10, SERPINE1</i>                                                                                                     | 2  |
| Cell morphology     | Mineralization             | Mineralization of eukaryotic cells   | $1.74 \times 10^{-3}$ | <i>AXL, SNCA, TGFB1</i>                                                                                                    | 3  |
| Cell morphology     | Mineralization             | Mineralization of cell lines         | $7.45 \times 10^{-3}$ | <i>SNCA, TGFB1</i>                                                                                                         | 2  |
| Cell morphology     | Polarity                   | Polarity of eukaryotic cells         | $5.04 \times 10^{-3}$ | <i>CXCL12, EGFR</i>                                                                                                        | 2  |
| Cell morphology     | Tubulation                 | Tubulation of endothelial cells      | $5.41 \times 10^{-3}$ | <i>AXL, IGFBP3, MGP</i>                                                                                                    | 3  |
| Cell morphology     | Tubulation                 | Tubulation of eukaryotic cells       | $1.68 \times 10^{-2}$ | <i>AXL, CXCL12, IGFBP3, MGP</i>                                                                                            | 4  |
| Cell morphology     | Length                     | Length of neurites                   | $7.45 \times 10^{-3}$ | <i>BDNF, ESR1</i>                                                                                                          | 2  |
| Cell morphology     | Shape change               | Shape change of fibroblasts          | $7.45 \times 10^{-3}$ | <i>CDKN2A, FN1</i>                                                                                                         | 2  |
| Cell morphology     | Polarization               | Polarization of leukocytes           | $7.62 \times 10^{-3}$ | <i>CXCL12, FN1, TGFB1</i>                                                                                                  | 3  |
| Respiratory disease | Non-small cell lung cancer | Non-small cell lung cancer           | $2.45 \times 10^{-6}$ | <i>AKT3, B2M, CDH1, CDKN2A, DNAJB4, EGFR, EPCAM, FN1, FYN, MAFB, MSLN, RB1, RET, S100P, TUBB2A</i>                         | 15 |

|                      |                                             |                                             |                       |                                                                                                                                                                                                                                                                                                                                                                                                                                                                                                                                                                                                                                                                                                         |     |
|----------------------|---------------------------------------------|---------------------------------------------|-----------------------|---------------------------------------------------------------------------------------------------------------------------------------------------------------------------------------------------------------------------------------------------------------------------------------------------------------------------------------------------------------------------------------------------------------------------------------------------------------------------------------------------------------------------------------------------------------------------------------------------------------------------------------------------------------------------------------------------------|-----|
| Respiratory disease  | Respiratory disorder                        | Respiratory disorder                        | $1.36 \times 10^{-5}$ | <i>BDNF, CD24, CTSZ (includes EG:1522), EGFR, ESR1, FN1, GATA3, GLUL, HIST1H2AC, HIST1H2BD, HIST1H2BK, HIST2H2AA3, HIST2H2BE, HMGA2, HNMT, IGFBP3, IL18, MGP, PDGFC, RET, S100P, SPARC, TGFB1, XBP1, ZYX</i>                                                                                                                                                                                                                                                                                                                                                                                                                                                                                            | 25  |
| Respiratory disease  | Severe acute respiratory syndrome           | Severe acute respiratory syndrome           | $2.05 \times 10^{-5}$ | <i>CD24, CTSZ (includes EG:1522), GLUL, HIST1H2AC, HIST1H2BD, HIST1H2BK, HIST2H2AA3, HIST2H2BE, PDGFC, S100P, SPARC, ZYX</i>                                                                                                                                                                                                                                                                                                                                                                                                                                                                                                                                                                            | 12  |
| Respiratory disease  | Non-small-cell lung carcinoma               | Non-small-cell lung carcinoma               | $4.92 \times 10^{-5}$ | <i>AKT3, B2M, CDKN2A, EGFR, EPCAM, FN1, FYN, MAFB, MSLN, RB1, RET, TUBB2A</i>                                                                                                                                                                                                                                                                                                                                                                                                                                                                                                                                                                                                                           | 12  |
| Respiratory disease  | Lung carcinoma                              | Lung carcinoma                              | $9.52 \times 10^{-5}$ | <i>ABCB1, AKT3, B2M, CDKN2A, CLDN3, EGFR, EPCAM, FN1, FYN, LOX, MAFB, MSLN, RB1, RET, TUBB2A</i>                                                                                                                                                                                                                                                                                                                                                                                                                                                                                                                                                                                                        | 15  |
| Respiratory disease  | Lung cancer                                 | Lung cancer                                 | $8.27 \times 10^{-4}$ | <i>ABCB1, AKT3, B2M, CDH1, CDKN2A, CLDN3, DNAJB4, EGFR, EPCAM, FN1, FYN, LOX, MAFB, MSLN, RB1, RET, S100P, TUBB2A</i>                                                                                                                                                                                                                                                                                                                                                                                                                                                                                                                                                                                   | 18  |
| Respiratory disease  | Congenital central hypoventilation syndrome | Congenital central hypoventilation syndrome | $7.45 \times 10^{-3}$ | <i>BDNF, RET</i>                                                                                                                                                                                                                                                                                                                                                                                                                                                                                                                                                                                                                                                                                        | 2   |
| Neurological disease | Alzheimer disease                           | Alzheimer disease                           | $7.95 \times 10^{-6}$ | <i>ABAT, AKAP2, ANK3, BDNF, BIN1, CDC42EP3, CDKN2A, COL4A1, COL4A2, CTGF, CXCL12, DNAJC15, EML1 (includes EG:2009), ESR1, EXT1, GATA3, GREB1, GRHL2, HMGA1, ICAM1, IGFBP3, IGFBP6, LEPREL1, LPHN2, MAP1B, MMP1 (includes EG:4312), NEFH, PLTP, RAB3B, RNASET2, SCD, SELENBP1, SERPINA3, SERPINE2, SLC12A8, SNCA, SPARC, STXBP6, TGFB1, TGM2, TUBB2A, UBB, UCHL1, WWOX</i>                                                                                                                                                                                                                                                                                                                               | 44  |
| Neurological disease | Neurological disorder                       | Neurological disorder of rodents            | $6.49 \times 10^{-4}$ | <i>ATXN1, BDNF, IL18, SNCA, TGFB1</i>                                                                                                                                                                                                                                                                                                                                                                                                                                                                                                                                                                                                                                                                   | 5   |
| Neurological disease | Neurological disorder                       | Neurological disorder of mice               | $1.72 \times 10^{-3}$ | <i>ATXN1, BDNF, SNCA, TGFB1</i>                                                                                                                                                                                                                                                                                                                                                                                                                                                                                                                                                                                                                                                                         | 4   |
| Neurological disease | Neurological disorder                       | Neurological disorder                       | $1.93 \times 10^{-3}$ | <i>ABAT, ABCB1, AGA, AKAP2, AKAP12, AKR1B1, AKR1C2, AKT3, ANK3, ATXN1, BCAS3, BDNF, BIN1, C6ORF97, CA2, CD24, CDC42EP3, CDH2, CDKN2A, CDS1, COCH, COL4A1, COL4A2, CREBBP, CRYAB, CTGF, CXCL12, DFNA5, DKK3, DNAJC15, DUSP4, ECM1, EGFR, EGR3, EML1 (includes EG:2009), ENOSF1, ESR1, EXT1, FHL2, FNDC3B, FYN, GATA3, GFRA1, GJA1, GNA14, GNAL, GREB1, GRHL2, HIST2H2AA3, HMGA1, ICAM1, ID4, IGFBP3, IGFBP6, IL18, IL7R, ISOC1, LAMB1, LDHB, LEPREL1, LPCAT1, LPHN2, MAP1B, MGP, MLLT11, MMP1 (includes EG:4312), MREG, MT1E, MUC1, NCOA3, NDN, NEFH, NSMAF, OLFM1, ORC5L, PBX1, PIK3R1, PLTP, PSMB9, RAB3B, RAI14, RAMP3, RCN1, RET, RNASET2, S100P, SCD, SCHIP1, SCUBE2, SDC2, SELENBP1, SERPINA3,</i> | 115 |

|                      |                                             |                                             |                       |                                                                                                                                                                               |    |
|----------------------|---------------------------------------------|---------------------------------------------|-----------------------|-------------------------------------------------------------------------------------------------------------------------------------------------------------------------------|----|
|                      |                                             |                                             |                       | <i>SERPINE1, SERPINE2, SGCE, SLC12A2, SLC12A8, SLC16A1, SLC24A3, SLC27A6, SNCA, SOX3, SPARC, SRPX, STXBP6, TGFB1, TGM2, TUBB2A, TUBB2B, UBB, UCHL1, VAV3, VIM, WWOX, XBP1</i> |    |
| Neurological disease | Neurological deficiency                     | Neurological deficiency                     | $1.56 \times 10^{-3}$ | <i>MGP, TGFB1</i>                                                                                                                                                             | 2  |
| Neurological disease | Nonsyndromic hearing impairment             | Nonsyndromic hearing impairment             | $2.28 \times 10^{-3}$ | <i>COCH, DFNA5, GRHL2</i>                                                                                                                                                     | 3  |
| Neurological disease | Glioma                                      | Glioma                                      | $2.74 \times 10^{-3}$ | <i>AKT3, CDKN2A, EGFR, ESR1, ID2, PDGFC, RB1, RET</i>                                                                                                                         | 8  |
| Neurological disease | Brain tumor                                 | Brain tumor                                 | $3.08 \times 10^{-3}$ | <i>ABAT, AKT3, CDKN2A, EGFR, ESR1, FYN, ID2, PDGFC, RB1, RET, TGFB1, TUBB2A</i>                                                                                               | 12 |
| Neurological disease | Astrocytoma                                 | Astrocytoma                                 | $3.20 \times 10^{-3}$ | <i>AKT3, EGFR, ESR1, ID2, PDGFC, RET</i>                                                                                                                                      | 6  |
| Neurological disease | Glioblastoma                                | Glioblastoma                                | $4.76 \times 10^{-3}$ | <i>AKT3, EGFR, ESR1, PDGFC, RET</i>                                                                                                                                           | 5  |
| Neurological disease | Congenital central hypoventilation syndrome | Congenital central hypoventilation syndrome | $7.45 \times 10^{-3}$ | <i>BDNF, RET</i>                                                                                                                                                              | 2  |
| Neurological disease | Progressive supranuclear palsy              | Progressive supranuclear palsy              | $9.07 \times 10^{-3}$ | <i>ABAT, SERPINA3, TGM2, UBB</i>                                                                                                                                              | 4  |
| Cellular compromise  | Adhesion                                    | Adhesion of cancer cells                    | $1.34 \times 10^{-5}$ | <i>CDH2, CXCL12, EGFR, FN1, ICAM1, MCAM</i>                                                                                                                                   | 6  |
| Cellular compromise  | Adhesion                                    | Adhesion of melanoma cells                  | $1.35 \times 10^{-2}$ | <i>CDH2, MCAM</i>                                                                                                                                                             | 2  |
| Cellular compromise  | Aggregation                                 | Aggregation of tumor cells                  | $1.56 \times 10^{-3}$ | <i>CDH2, CEACAM5 (includes EG:1048)</i>                                                                                                                                       | 2  |
| Tumor morphology     | Adhesion                                    | Adhesion of cancer cells                    | $1.34 \times 10^{-5}$ | <i>CDH2, CXCL12, EGFR, FN1, ICAM1, MCAM</i>                                                                                                                                   | 6  |
| Tumor morphology     | Adhesion                                    | Adhesion of melanoma cells                  | $1.35 \times 10^{-2}$ | <i>CDH2, MCAM</i>                                                                                                                                                             | 2  |
| Tumor morphology     | Aggregation                                 | Aggregation of tumor cells                  | $1.56 \times 10^{-3}$ | <i>CDH2, CEACAM5 (includes EG:1048)</i>                                                                                                                                       | 2  |

|                  |                       |                                                         |                       |                                                                                                                                                                                                                                                                                                              |    |
|------------------|-----------------------|---------------------------------------------------------|-----------------------|--------------------------------------------------------------------------------------------------------------------------------------------------------------------------------------------------------------------------------------------------------------------------------------------------------------|----|
| Tumor morphology | Invasion              | Invasion of melanoma cells                              | $7.45 \times 10^{-3}$ | <i>CDH1, MCAM</i>                                                                                                                                                                                                                                                                                            | 2  |
| Tumor morphology | Morphology            | Morphology of cancer cells                              | $1.03 \times 10^{-2}$ | <i>EGFR, PLAGL1</i>                                                                                                                                                                                                                                                                                          | 2  |
| Cell cycle       | Cell division process | Cell division process of eukaryotic cells               | $1.43 \times 10^{-5}$ | <i>AXL, BMP7, CALCR, CCNE2, CDH1, CDKN2A, COL1A1, CYR61, DNAJB4, EGFR, ESR1, FN1, GDF15, GNAI1, HMGA1, ID2, IFI16, IGFBP3, IGFBP5, IRS1, KRT19, MYB (includes EG:4602), NCOA3, PLAGL1, RB1, SPARC, TGFB1, XBP1</i>                                                                                           | 28 |
| Cell cycle       | Cell division process | Cell division process                                   | $3.11 \times 10^{-5}$ | <i>AXL, BCAT1, BMP7, BOP1, BTG3, CALCR, CCNE2, CDH1, CDKN2A, COL1A1, CREBBP, CXCL12, CYR61, DHRS2 (includes EG:10202), DNAJB4, EGFR, ESR1, FN1, FOSL1, GDF15, GNAI1, HMGA1, ID2, IFI16, IGFBP3, IGFBP5, IRS1, KRT19, MYB (includes EG:4602), NCOA3, PLAGL1, PTPRK, RB1, SPARC, TGFB1, TPD52L1, UBB, XBP1</i> | 38 |
| Cell cycle       | Cell division process | Cell division process of cell lines                     | $1.58 \times 10^{-4}$ | <i>AXL, CALCR, CDH1, CDKN2A, CYR61, DNAJB4, EGFR, ESR1, GDF15, GNAI1, HMGA1, IFI16, IGFBP3, IGFBP5, IRS1, KRT19, MYB (includes EG:4602), NCOA3, PLAGL1, RB1, SPARC, TGFB1, XBP1</i>                                                                                                                          | 23 |
| Cell cycle       | Cell division process | Cell division process of tumor cell lines               | $2.00 \times 10^{-4}$ | <i>AXL, CDH1, CDKN2A, CYR61, DNAJB4, EGFR, ESR1, GDF15, GNAI1, HMGA1, IFI16, IGFBP3, IGFBP5, KRT19, MYB (includes EG:4602), NCOA3, PLAGL1, RB1, TGFB1, XBP1</i>                                                                                                                                              | 20 |
| Cell cycle       | Cell division process | Cell division process of thyrocytes                     | $5.28 \times 10^{-4}$ | <i>CDKN2A, TGFB1</i>                                                                                                                                                                                                                                                                                         | 2  |
| Cell cycle       | Cell division process | Arrest in cell division process of carcinoma cell lines | $6.52 \times 10^{-4}$ | <i>CDKN2A, CYR61, IFI16, RB1</i>                                                                                                                                                                                                                                                                             | 4  |
| Cell cycle       | Cell division process | Cell division process of breast cancer cell lines       | $6.88 \times 10^{-4}$ | <i>CDH1, CDKN2A, EGFR, ESR1, GDF15, IGFBP5, KRT19, XBP1</i>                                                                                                                                                                                                                                                  | 8  |
| Cell cycle       | Cell division process | Cell division process of carcinoma cell lines           | $1.01 \times 10^{-3}$ | <i>CDKN2A, CYR61, DNAJB4, IFI16, RB1</i>                                                                                                                                                                                                                                                                     | 5  |
| Cell cycle       | Cell division process | Arrest in cell division process of eukaryotic cells     | $1.20 \times 10^{-3}$ | <i>CALCR, CDKN2A, COL1A1, CYR61, EGFR, FN1, GDF15, IFI16, IGFBP5, KRT19, PLAGL1, RB1, TGFB1, XBP1</i>                                                                                                                                                                                                        | 14 |

|            |                        |                                                             |                       |                                                                                          |    |
|------------|------------------------|-------------------------------------------------------------|-----------------------|------------------------------------------------------------------------------------------|----|
| Cell cycle | Cell division process  | Arrest in cell division process of normal cells             | $1.31 \times 10^{-3}$ | <i>CDKN2A, COL1A1, FN1, RB1, TGFB1</i>                                                   | 5  |
| Cell cycle | Cell division process  | Arrest in cell division process of breast cancer cell lines | $2.94 \times 10^{-3}$ | <i>EGFR, GDF15, IGFBP5, KRT19, XBP1</i>                                                  | 5  |
| Cell cycle | Cell division process  | Arrest in cell division process of tumor cell lines         | $3.29 \times 10^{-3}$ | <i>CDKN2A, CYR61, EGFR, GDF15, IFI16, IGFBP5, KRT19, PLAGL1, RB1, TGFB1, XBP1</i>        | 11 |
| Cell cycle | Cell division process  | Cell division process of lung cell lines                    | $3.64 \times 10^{-3}$ | <i>CDKN2A, NCOA3, SPARC</i>                                                              | 3  |
| Cell cycle | Cell division process  | Entry into cell division process                            | $4.97 \times 10^{-3}$ | <i>CDH1, CDKN2A, CREBBP, FN1, NCOA3, RB1, TGFB1</i>                                      | 7  |
| Cell cycle | Cell division process  | Arrest in cell division process of cell lines               | $5.19 \times 10^{-3}$ | <i>CALCR, CDKN2A, CYR61, EGFR, GDF15, IFI16, IGFBP5, KRT19, PLAGL1, RB1, TGFB1, XBP1</i> | 12 |
| Cell cycle | Cell division process  | Cell division process of normal cells                       | $5.61 \times 10^{-3}$ | <i>BMP7, CCNE2, CDKN2A, COL1A1, FN1, ID2, RB1, TGFB1</i>                                 | 8  |
| Cell cycle | Cell division process  | Cell division process of epithelial cell lines              | $9.99 \times 10^{-3}$ | <i>CALCR, CDKN2A, IRS1, TGFB1</i>                                                        | 4  |
| Cell cycle | Cell division process  | Cell division process of lung cancer cell lines             | $1.10 \times 10^{-2}$ | <i>CDKN2A, CYR61, DNAJB4, RB1</i>                                                        | 4  |
| Cell cycle | Cell division process  | Arrest in cell division process of lung cancer cell lines   | $1.18 \times 10^{-2}$ | <i>CDKN2A, CYR61, RB1</i>                                                                | 3  |
| Cell cycle | Cell cycle progression | Arrest in cell cycle progression of eukaryotic cells        | $8.92 \times 10^{-5}$ | <i>CDKN2A, COL1A1, EGFR, IFI16, KRT19, PLAGL1, RB1, TGFB1, XBP1</i>                      | 9  |
| Cell cycle | Cell cycle progression | Cell cycle progression of cell lines                        | $1.56 \times 10^{-4}$ | <i>CDKN2A, DNAJB4, EGFR, ESR1, IFI16, IRS1, KRT19, PLAGL1, RB1, TGFB1, XBP1</i>          | 11 |

|            |                        |                                                            |                       |                                                                                                                                                                                            |    |
|------------|------------------------|------------------------------------------------------------|-----------------------|--------------------------------------------------------------------------------------------------------------------------------------------------------------------------------------------|----|
| Cell cycle | Cell cycle progression | Cell cycle progression                                     | $2.22 \times 10^{-4}$ | <i>AXL, BMP7, BOP1, BTG3, CDKN2A, COL1A1, CXCL12, CYR61, DHRS2 (includes EG:10202), DNAJB4, EGFR, ESR1, FOSL1, IFI16, IGFBP3, IRS1, KRT19, PLAGL1, PTPRK, RB1, SPARC, TGFB1, UBB, XBP1</i> | 24 |
| Cell cycle | Cell cycle progression | Arrest in cell cycle progression of blood cells            | $2.29 \times 10^{-4}$ | <i>CDKN2A, COL1A1, TGFB1</i>                                                                                                                                                               | 3  |
| Cell cycle | Cell cycle progression | Cell cycle progression of eukaryotic cells                 | $2.32 \times 10^{-4}$ | <i>CDKN2A, COL1A1, DNAJB4, EGFR, ESR1, IFI16, IRS1, KRT19, PLAGL1, RB1, TGFB1, XBP1</i>                                                                                                    | 12 |
| Cell cycle | Cell cycle progression | Arrest in cell cycle progression of tumor cell lines       | $2.82 \times 10^{-4}$ | <i>CDKN2A, EGFR, IFI16, KRT19, PLAGL1, RB1, XBP1</i>                                                                                                                                       | 7  |
| Cell cycle | Cell cycle progression | Cell cycle progression of tumor cell lines                 | $6.09 \times 10^{-4}$ | <i>CDKN2A, DNAJB4, EGFR, ESR1, IFI16, KRT19, PLAGL1, RB1, XBP1</i>                                                                                                                         | 9  |
| Cell cycle | Cell cycle progression | Cell cycle progression of carcinoma cell lines             | $1.28 \times 10^{-3}$ | <i>DNAJB4, IFI16, RB1</i>                                                                                                                                                                  | 3  |
| Cell cycle | Cell cycle progression | Arrest in cell cycle progression of carcinoma cell lines   | $1.56 \times 10^{-3}$ | <i>IFI16, RB1</i>                                                                                                                                                                          | 2  |
| Cell cycle | Cell cycle progression | Cell cycle progression of bone cancer cell lines           | $2.28 \times 10^{-3}$ | <i>CDKN2A, PLAGL1, RB1</i>                                                                                                                                                                 | 3  |
| Cell cycle | Cell cycle progression | Cell cycle progression of fibroblast cell lines            | $2.91 \times 10^{-3}$ | <i>CDKN2A, IRS1, RB1</i>                                                                                                                                                                   | 3  |
| Cell cycle | Cell cycle progression | Arrest in cell cycle progression of bone cancer cell lines | $3.07 \times 10^{-3}$ | <i>CDKN2A, PLAGL1</i>                                                                                                                                                                      | 2  |
| Cell cycle | Cell cycle progression | Cell cycle progression of t lymphocytes                    | $5.04 \times 10^{-3}$ | <i>CDKN2A, TGFB1</i>                                                                                                                                                                       | 2  |

|            |                        |                                                  |                       |                                                                              |    |
|------------|------------------------|--------------------------------------------------|-----------------------|------------------------------------------------------------------------------|----|
| Cell cycle | Cell cycle progression | Cell cycle progression of normal cells           | $1.20 \times 10^{-2}$ | <i>CDKN2A, COL1A1, RB1, TGFB1</i>                                            | 4  |
| Cell cycle | Cell cycle progression | Cell cycle progression of lung cancer cell lines | $1.35 \times 10^{-2}$ | <i>DNAJB4, RB1</i>                                                           | 2  |
| Cell cycle | G1 phase               | G1 phase of normal cells                         | $2.29 \times 10^{-4}$ | <i>CCNE2, FN1, ID2, RB1</i>                                                  | 4  |
| Cell cycle | G1 phase               | G1 phase of eukaryotic cells                     | $3.04 \times 10^{-4}$ | <i>CCNE2, CDKN2A, CYR61, EGFR, FN1, GDF15, HMGA1, ID2, NCOA3, RB1, TGFB1</i> | 11 |
| Cell cycle | G1 phase               | G1 phase of epithelial cells                     | $3.07 \times 10^{-3}$ | <i>ID2, RB1</i>                                                              | 2  |
| Cell cycle | G1 phase               | Arrest in G1 phase of eukaryotic cells           | $5.60 \times 10^{-3}$ | <i>CDKN2A, CYR61, EGFR, FN1, GDF15, RB1, TGFB1</i>                           | 7  |
| Cell cycle | G1 phase               | G1 phase of tumor cell lines                     | $9.17 \times 10^{-3}$ | <i>CDKN2A, CYR61, EGFR, GDF15, HMGA1, NCOA3, TGFB1</i>                       | 7  |
| Cell cycle | G1 phase               | Arrest in G1 phase of normal cells               | $1.35 \times 10^{-2}$ | <i>FN1, RB1</i>                                                              | 2  |
| Cell cycle | G1/S phase transition  | G1/S phase transition of normal cells            | $3.94 \times 10^{-4}$ | <i>CCNE2, FN1, ID2</i>                                                       | 3  |
| Cell cycle | G1/S phase transition  | G1/S phase transition of eukaryotic cells        | $1.59 \times 10^{-3}$ | <i>CCNE2, CDKN2A, FN1, HMGA1, ID2, NCOA3</i>                                 | 6  |
| Cell cycle | S phase                | Entry into S phase of cell lines                 | $8.74 \times 10^{-4}$ | <i>CDH1, CDKN2A, NCOA3, RB1, TGFB1</i>                                       | 5  |
| Cell cycle | S phase                | Entry into S phase of colon cancer cell lines    | $1.56 \times 10^{-3}$ | <i>CDH1, CDKN2A</i>                                                          | 2  |
| Cell cycle | S phase                | Entry into S phase of lung cell lines            | $1.56 \times 10^{-3}$ | <i>CDKN2A, NCOA3</i>                                                         | 2  |
| Cell cycle | S phase                | S phase of cell lines                            | $7.07 \times 10^{-3}$ | <i>CDH1, CDKN2A, EGFR, NCOA3, RB1, TGFB1</i>                                 | 6  |
| Cell cycle | S phase                | S phase of tumor cell lines                      | $9.85 \times 10^{-3}$ | <i>CDH1, CDKN2A, EGFR, RB1, TGFB1</i>                                        | 5  |

|                                            |               |                                             |                       |                                                                                                                                                                                                  |    |
|--------------------------------------------|---------------|---------------------------------------------|-----------------------|--------------------------------------------------------------------------------------------------------------------------------------------------------------------------------------------------|----|
| Cell cycle                                 | S phase       | Entry into S phase of fibroblast cell lines | $1.03 \times 10^{-2}$ | <i>CDKN2A, NCOA3</i>                                                                                                                                                                             | 2  |
| Cell cycle                                 | Interphase    | Entry into interphase of eukaryotic cells   | $1.18 \times 10^{-3}$ | <i>CDH1, CDKN2A, FN1, NCOA3, RB1, TGFB1</i>                                                                                                                                                      | 6  |
| Cell cycle                                 | Interphase    | Interphase of eukaryotic cells              | $1.34 \times 10^{-3}$ | <i>CALCR, CCNE2, CDH1, CDKN2A, CYR61, EGFR, FN1, GDF15, HMGA1, ID2, IGFBP5, MYB (includes EG:4602), NCOA3, RB1, TGFB1</i>                                                                        | 15 |
| Cell cycle                                 | Interphase    | Interphase of normal cells                  | $2.94 \times 10^{-3}$ | <i>CCNE2, CDKN2A, FN1, ID2, RB1</i>                                                                                                                                                              | 5  |
| Cell cycle                                 | Interphase    | Interphase of tumor cell lines              | $5.74 \times 10^{-3}$ | <i>CDH1, CDKN2A, CYR61, EGFR, GDF15, HMGA1, IGFBP5, MYB (includes EG:4602), NCOA3, RB1, TGFB1</i>                                                                                                | 11 |
| Cell cycle                                 | Interphase    | Interphase of cell lines                    | $9.76 \times 10^{-3}$ | <i>CALCR, CDH1, CDKN2A, CYR61, EGFR, GDF15, HMGA1, IGFBP5, MYB (includes EG:4602), NCOA3, RB1, TGFB1</i>                                                                                         | 12 |
| Cell cycle                                 | Interphase    | Interphase of breast cancer cell lines      | $9.85 \times 10^{-3}$ | <i>CDH1, CDKN2A, EGFR, GDF15, IGFBP5</i>                                                                                                                                                         | 5  |
| Cell cycle                                 | Interphase    | Interphase of carcinoma cell lines          | $1.03 \times 10^{-2}$ | <i>CDKN2A, CYR61, RB1</i>                                                                                                                                                                        | 3  |
| Cell cycle                                 | Interphase    | Interphase of epithelial cell lines         | $1.03 \times 10^{-2}$ | <i>CALCR, CDKN2A, TGFB1</i>                                                                                                                                                                      | 3  |
| Cell cycle                                 | Cell stage    | Cell stage                                  | $2.26 \times 10^{-3}$ | <i>AXL, BCAT1, BMP7, BTG3, CALCR, CCNE2, CDH1, CDKN2A, CREBBP, CXCL12, CYR61, EGFR, FN1, GDF15, GNAI1, HMGA1, ID2, IGFBP3, IGFBP5, MYB (includes EG:4602), NCOA3, RB1, SPARC, TGFB1, TPD52L1</i> | 25 |
| Cell cycle                                 | Cell stage    | Entry into cell stage                       | $2.59 \times 10^{-3}$ | <i>CDH1, CDKN2A, CREBBP, FN1, NCOA3, RB1, TGFB1</i>                                                                                                                                              | 7  |
| Cell cycle                                 | Cell stage    | Cell stage of eukaryotic cells              | $3.92 \times 10^{-3}$ | <i>BMP7, CALCR, CCNE2, CDH1, CDKN2A, CYR61, EGFR, FN1, GDF15, GNAI1, HMGA1, ID2, IGFBP5, MYB (includes EG:4602), NCOA3, RB1, TGFB1</i>                                                           | 17 |
| Cell cycle                                 | Cell stage    | Cell stage of normal cells                  | $5.79 \times 10^{-3}$ | <i>BMP7, CCNE2, CDKN2A, FN1, ID2, RB1</i>                                                                                                                                                        | 6  |
| Cell cycle                                 | Mitogenesis   | Mitogenesis                                 | $8.55 \times 10^{-3}$ | <i>AXL, CYR61, EGFR, IGFBP3, SPARC, TGFB1</i>                                                                                                                                                    | 6  |
| Connective tissue development and function | Proliferation | Proliferation of chondrocytes               | $1.79 \times 10^{-5}$ | <i>CTGF, IGFBP3, IL18, STC1</i>                                                                                                                                                                  | 4  |

|                                            |                        |                                                 |                       |                                                   |   |
|--------------------------------------------|------------------------|-------------------------------------------------|-----------------------|---------------------------------------------------|---|
| Connective tissue development and function | Proliferation          | Proliferation of fibroblast cell lines          | $1.68 \times 10^{-2}$ | <i>CDKN2A, CXCL12, FN1, S100P, TGFB1</i>          | 5 |
| Connective tissue development and function | Binding                | Binding of fibroblasts                          | $3.16 \times 10^{-5}$ | <i>IGFBP3, LGALS3BP, SDC2, SPARC</i>              | 4 |
| Connective tissue development and function | Attachment             | Attachment of fibroblasts                       | $1.56 \times 10^{-3}$ | <i>FN1, TGFB1</i>                                 | 2 |
| Connective tissue development and function | Growth                 | Growth of fibroblast cell lines                 | $1.66 \times 10^{-3}$ | <i>EGFR, FN1, IGFBP3, IRS1, NRCAM, RET, TGFB1</i> | 7 |
| Connective tissue development and function | Cell cycle progression | Cell cycle progression of fibroblast cell lines | $2.91 \times 10^{-3}$ | <i>CDKN2A, IRS1, RB1</i>                          | 3 |
| Connective tissue development and function | Aggregation            | Aggregation of fibroblast cell lines            | $7.45 \times 10^{-3}$ | <i>CDH2, EPCAM</i>                                | 2 |
| Connective tissue development and function | Shape change           | Shape change of fibroblasts                     | $7.45 \times 10^{-3}$ | <i>CDKN2A, FN1</i>                                | 2 |
| Connective tissue development and function | S phase                | Entry into S phase of fibroblast cell lines     | $1.03 \times 10^{-2}$ | <i>CDKN2A, NCOA3</i>                              | 2 |
| Connective tissue development and function | Differentiation        | Differentiation of chondrocytes                 | $1.03 \times 10^{-2}$ | <i>STC1, TGFB1</i>                                | 2 |
| Connective tissue development and function | Differentiation        | Differentiation of fibroblast cell lines        | $1.52 \times 10^{-2}$ | <i>BMP7, MGP, TGFB1</i>                           | 3 |

|                         |                                   |                                                |                       |                                                                                                                              |    |
|-------------------------|-----------------------------------|------------------------------------------------|-----------------------|------------------------------------------------------------------------------------------------------------------------------|----|
| Infectious disease      | Severe acute respiratory syndrome | Severe acute respiratory syndrome              | $2.05 \times 10^{-5}$ | <i>CD24, CTSZ (includes EG:1522), GLUL, HIST1H2AC, HIST1H2BD, HIST1H2BK, HIST2H2AA3, HIST2H2BE, PDGFC, S100P, SPARC, ZYX</i> | 12 |
| Hematopoiesis           | Migration                         | Migration of myeloid cells                     | $6.84 \times 10^{-5}$ | <i>ANXA1, CXCL12, FN1, ICAM1, SERPINE1, TGFB1, TGM2</i>                                                                      | 7  |
| Hematopoiesis           | Migration                         | Migration of neutrophils                       | $3.97 \times 10^{-4}$ | <i>ANXA1, FN1, ICAM1, SERPINE1, TGFB1</i>                                                                                    | 5  |
| Hematopoiesis           | Migration                         | Migration of granulocytes                      | $4.78 \times 10^{-4}$ | <i>ANXA1, CXCL12, FN1, ICAM1, SERPINE1, TGFB1</i>                                                                            | 6  |
| Hematopoiesis           | Differentiation                   | Differentiation of T lymphocytes               | $2.81 \times 10^{-4}$ | <i>CDKN2A, CXCL12, GATA3, IL18, MUC1, TGFB1</i>                                                                              | 6  |
| Hematopoiesis           | Differentiation                   | Differentiation of mononuclear leukocytes      | $4.13 \times 10^{-3}$ | <i>CDKN2A, CXCL12, GATA3, IFI16, IL18, MUC1, TGFB1</i>                                                                       | 7  |
| Hematopoiesis           | Differentiation                   | Differentiation of Th2 cells                   | $5.04 \times 10^{-3}$ | <i>GATA3, TGFB1</i>                                                                                                          | 2  |
| Hematopoiesis           | Development                       | T cell development                             | $1.70 \times 10^{-3}$ | <i>CDKN2A, CXCL12, GATA3, IL18, IL7R, MUC1, RAC2, TGFB1, TNFRSF6B</i>                                                        | 9  |
| Hematopoiesis           | Development                       | Development of blood cells                     | $2.13 \times 10^{-3}$ | <i>CDKN2A, CXCL12, EGFR, GATA3, IL18, IL7R, MUC1, RAC2, TGFB1, TNFRSF6B</i>                                                  | 10 |
| Hematopoiesis           | Apoptosis                         | Apoptosis of T lymphocytes                     | $2.71 \times 10^{-3}$ | <i>CDKN2A, CXCL12, IL7R, RAC2, TGFB1, TNFRSF6B</i>                                                                           | 6  |
| Hematopoiesis           | Induction                         | Induction of T lymphocytes                     | $3.07 \times 10^{-3}$ | <i>IL18, MUC1</i>                                                                                                            | 2  |
| Hematopoiesis           | Activation-induced cell death     | Activation-induced cell death of T lymphocytes | $1.35 \times 10^{-2}$ | <i>RAC2, TGFB1</i>                                                                                                           | 2  |
| Immune cell trafficking | Migration                         | Migration of myeloid cells                     | $6.84 \times 10^{-5}$ | <i>ANXA1, CXCL12, FN1, ICAM1, SERPINE1, TGFB1, TGM2</i>                                                                      | 7  |
| Immune cell trafficking | Migration                         | Migration of neutrophils                       | $3.97 \times 10^{-4}$ | <i>ANXA1, FN1, ICAM1, SERPINE1, TGFB1</i>                                                                                    | 5  |
| Immune cell trafficking | Migration                         | Migration of granulocytes                      | $4.78 \times 10^{-4}$ | <i>ANXA1, CXCL12, FN1, ICAM1, SERPINE1, TGFB1</i>                                                                            | 6  |
| Immune cell trafficking | Migration                         | Lymphocyte migration                           | $6.53 \times 10^{-4}$ | <i>CXCL12, EGFR, FN1, ICAM1, ICAM2, IL18, RASGRP1, TGM2, TNFRSF6B</i>                                                        | 9  |
| Immune cell trafficking | Migration                         | Migration of mononuclear leukocytes            | $8.93 \times 10^{-4}$ | <i>CXCL12, EGFR, FN1, ICAM1, ICAM2, IL18, RASGRP1, TGFB1, TGM2, TNFRSF6B</i>                                                 | 10 |
| Immune cell trafficking | Migration                         | Migration of leukocytes                        | $1.64 \times 10^{-3}$ | <i>ANXA1, CXCL12, EGFR, FN1, ICAM1, ICAM2, IL18, RASGRP1, RLN2, SERPINA3, SERPINE1, TGFB1, TGM2, TNFRSF6B</i>                | 14 |

|                                                |                        |                                           |                       |                                                                     |   |
|------------------------------------------------|------------------------|-------------------------------------------|-----------------------|---------------------------------------------------------------------|---|
| Immune cell trafficking                        | Adhesion               | Adhesion of lymphocytes                   | $1.07 \times 10^{-3}$ | <i>CXCL12, FN1, ICAM1, ICAM2, RASGRP1, TGFB1</i>                    | 6 |
| Immune cell trafficking                        | Adhesion               | Adhesion of leukocytes                    | $1.19 \times 10^{-3}$ | <i>ANXA1, CXCL12, FN1, ICAM1, ICAM2, PLTP, RASGRP1, RLN2, TGFB1</i> | 9 |
| Immune cell trafficking                        | Adhesion               | Adhesion of T lymphocytes                 | $2.12 \times 10^{-3}$ | <i>CXCL12, FN1, ICAM1, ICAM2, RASGRP1</i>                           | 5 |
| Cardiovascular system development and function | Neovascularization     | Neovascularization                        | $7.99 \times 10^{-5}$ | <i>CXCL12, ICAM1, TGFB1, TNFRSF6B</i>                               | 4 |
| Cardiovascular system development and function | Neovascularization     | Neovascularization of animal              | $1.56 \times 10^{-3}$ | <i>CXCL12, TNFRSF6B</i>                                             | 2 |
| Cardiovascular system development and function | Cardiovascular process | Cardiovascular process of coronary artery | $8.61 \times 10^{-4}$ | <i>EMP1, EMP3, ICAM1, IFI16, RB1, TUBB6</i>                         | 6 |
| Cardiovascular system development and function | Cardiovascular process | Cardiovascular process of blood vessel    | $2.28 \times 10^{-3}$ | <i>COL4A2, EMP1, EMP3, ICAM1, IFI16, RB1, TGFB1, TUBB6</i>          | 8 |
| Cardiovascular system development and function | Cardiovascular process | Cardiovascular process of animal          | $6.46 \times 10^{-3}$ | <i>CXCL12, CYR61, TNFRSF6B</i>                                      | 3 |
| Cardiovascular system development and function | Formation              | Formation of endothelial tube             | $2.37 \times 10^{-3}$ | <i>COL4A1, FN1, SERPINE1, TGFB1</i>                                 | 4 |
| Cardiovascular system development and function | Formation              | Formation of endothelial cells            | $1.35 \times 10^{-2}$ | <i>FN1, SERPINE1</i>                                                | 2 |
| Cardiovascular system development and function | Proliferation          | Proliferation of endothelial cells        | $3.19 \times 10^{-3}$ | <i>AXL, CDH2, COL4A1, COL4A2, ECM1, FN1, MGP</i>                    | 7 |

|                                                |                    |                                        |                       |                                                                                                    |    |
|------------------------------------------------|--------------------|----------------------------------------|-----------------------|----------------------------------------------------------------------------------------------------|----|
| Cardiovascular system development and function | Adhesion           | Adhesion of endothelial cells          | $4.35 \times 10^{-3}$ | <i>CDH2, FN1, ICAM1, ICAM2, TGFB1</i>                                                              | 5  |
| Cardiovascular system development and function | Adhesion           | Adhesion of endothelial cell lines     | $5.68 \times 10^{-3}$ | <i>ANXA1, CDH2, CXCL12, ICAM1, TGFB1</i>                                                           | 5  |
| Cardiovascular system development and function | Tubulation         | Tubulation of endothelial cells        | $5.41 \times 10^{-3}$ | <i>AXL, IGFBP3, MGP</i>                                                                            | 3  |
| Cardiovascular system development and function | Development        | Development of blood vessel            | $6.52 \times 10^{-3}$ | <i>COL1A1, COL4A2, CYR61, ECM1, FN1, IL18, SERPINE1, SPARC</i>                                     | 8  |
| Cardiovascular system development and function | Angiogenesis       | Angiogenesis                           | $1.35 \times 10^{-2}$ | <i>COL4A2, CYR61, ECM1, FN1, IL18, SERPINE1, SPARC</i>                                             | 7  |
| Cardiovascular system development and function | Binding            | Binding of endothelial cell lines      | $1.43 \times 10^{-2}$ | <i>AXL, FN1, ICAM1, PIK3R1</i>                                                                     | 4  |
| Organismal development                         | Neovascularization | Neovascularization                     | $7.99 \times 10^{-5}$ | <i>CXCL12, ICAM1, TGFB1, TNFRSF6B</i>                                                              | 4  |
| Organismal development                         | Neovascularization | Neovascularization of animal           | $1.56 \times 10^{-3}$ | <i>CXCL12, TNFRSF6B</i>                                                                            | 2  |
| Organismal development                         | Development        | Development of blood vessel            | $6.52 \times 10^{-3}$ | <i>COL1A1, COL4A2, CYR61, ECM1, FN1, IL18, SERPINE1, SPARC</i>                                     | 8  |
| Organismal development                         | Angiogenesis       | Angiogenesis                           | $1.35 \times 10^{-2}$ | <i>COL4A2, CYR61, ECM1, FN1, IL18, SERPINE1, SPARC</i>                                             | 7  |
| Tissue morphology                              | Quantity           | Quantity of cells                      | $8.16 \times 10^{-5}$ | <i>BDNF, BMP7, CDKN2A, CXCL12, ESR1, FN1, IGFBP3, IGFBP5, IGFBP6, KLF4, RB1, SNCA, STC1, TGFB1</i> | 14 |
| Tissue morphology                              | Quantity           | Quantity of tumor cell lines           | $1.92 \times 10^{-3}$ | <i>CDKN2A, ESR1, IGFBP3, IGFBP5, IGFBP6, KLF4</i>                                                  | 6  |
| Tissue morphology                              | Quantity           | Quantity of prostate cancer cell lines | $5.04 \times 10^{-3}$ | <i>IGFBP3, IGFBP5</i>                                                                              | 2  |

|                                            |                              |                                               |                       |                                                                                                                                                                                 |    |
|--------------------------------------------|------------------------------|-----------------------------------------------|-----------------------|---------------------------------------------------------------------------------------------------------------------------------------------------------------------------------|----|
| Dermatologic diseases and conditions       | Burn                         | Burn                                          | $1.37 \times 10^{-4}$ | <i>COL1A1, COL21A1, COL4A1, COL4A2, COL6A1, COL6A2, ESR1</i>                                                                                                                    | 7  |
| Dermatologic diseases and conditions       | Cutis laxa, recessive type 1 | Cutis laxa, recessive type 1                  | $1.56 \times 10^{-3}$ | <i>EFEMP2, LOX</i>                                                                                                                                                              | 2  |
| Dermatologic diseases and conditions       | Dermatological disorder      | Dermatological disorder                       | $1.40 \times 10^{-2}$ | <i>ADA, AREG, CDKN2A, COL1A1, COL21A1, COL4A1, COL4A2, COL6A1, COL6A2, ECM1, EFEMP2, EGFR, ESR1, FN1, FYN, GDF15, GJA1, LOX, MMP1 (includes EG:4312), TGFB1, TUBB2A, ZNF395</i> | 22 |
| DNA replication, recombination, and repair | Synthesis                    | Synthesis of DNA                              | $1.44 \times 10^{-4}$ | <i>AREG, BMP7, CDKN2A, CXCL12, CYR61, EGFR, ESR1, FN1, IGFBP3, IGFBP5, PIK3R1, RB1, TFPI2, TGFB1</i>                                                                            | 14 |
| DNA replication, recombination, and repair | Bending                      | Bending of DNA                                | $5.28 \times 10^{-4}$ | <i>ESR1, TFF1</i>                                                                                                                                                               | 2  |
| DNA replication, recombination, and repair | Incorporation                | Incorporation of thymidine                    | $2.12 \times 10^{-3}$ | <i>CDKN2A, EGFR, FN1, IGFBP5, TGFB1</i>                                                                                                                                         | 5  |
| DNA replication, recombination, and repair | Fragmentation                | Fragmentation of DNA                          | $3.40 \times 10^{-3}$ | <i>ABCB1, CDKN2A, CXCL12, GPX1, TFF3, TGFB1, TPD52L1</i>                                                                                                                        | 7  |
| DNA replication, recombination, and repair | Metabolism                   | Metabolism of DNA                             | $9.46 \times 10^{-3}$ | <i>ABCB1, AREG, CDKN2A, CXCL12, GPX1, KRT7, NT5E, ORC5L, PDGFC, TFF3, TGFB1, TPD52L1</i>                                                                                        | 12 |
| Cellular function and maintenance          | Contact growth inhibition    | Contact growth inhibition                     | $1.99 \times 10^{-4}$ | <i>BMP7, CD24, CDH1, CDKN2A, EGFR, IFI16, TGFB1</i>                                                                                                                             | 7  |
| Cellular function and maintenance          | Contact growth inhibition    | Contact growth inhibition of eukaryotic cells | $6.87 \times 10^{-4}$ | <i>BMP7, CD24, CDH1, EGFR, IFI16, TGFB1</i>                                                                                                                                     | 6  |
| Cellular function and maintenance          | Contact growth inhibition    | Contact growth inhibition of cell lines       | $2.12 \times 10^{-3}$ | <i>BMP7, CD24, CDH1, EGFR, IFI16</i>                                                                                                                                            | 5  |

|                                   |                           |                                                      |                       |                                                                       |   |
|-----------------------------------|---------------------------|------------------------------------------------------|-----------------------|-----------------------------------------------------------------------|---|
| Cellular function and maintenance | Contact growth inhibition | Contact growth inhibition of tumor cell lines        | $5.30 \times 10^{-3}$ | <i>BMP7, CD24, CDH1, IFI16</i>                                        | 4 |
| Cellular function and maintenance | Contact growth inhibition | Contact growth inhibition of colon cancer cell lines | $1.03 \times 10^{-2}$ | <i>CD24, CDH1</i>                                                     | 2 |
| Cellular function and maintenance | Differentiation           | Differentiation of T lymphocytes                     | $2.81 \times 10^{-4}$ | <i>CDKN2A, CXCL12, GATA3, IL18, MUC1, TGFB1</i>                       | 6 |
| Cellular function and maintenance | Differentiation           | Differentiation of Th2 cells                         | $5.04 \times 10^{-3}$ | <i>GATA3, TGFB1</i>                                                   | 2 |
| Cellular function and maintenance | Organization              | Organization of cytoskeleton                         | $3.23 \times 10^{-4}$ | <i>CXCL12, FN1, FSCN1, ICAM1, PLS3, SDC2</i>                          | 6 |
| Cellular function and maintenance | Organization              | Organization of actin cytoskeleton                   | $3.64 \times 10^{-3}$ | <i>CXCL12, FN1, FSCN1, ICAM1</i>                                      | 4 |
| Cellular function and maintenance | Metabolic process         | Metabolic process of tumor cell lines                | $5.28 \times 10^{-4}$ | <i>EPCAM, SNCA</i>                                                    | 2 |
| Cellular function and maintenance | Development               | T cell development                                   | $1.70 \times 10^{-3}$ | <i>CDKN2A, CXCL12, GATA3, IL18, IL7R, MUC1, RAC2, TGFB1, TNFRSF6B</i> | 9 |
| Cellular function and maintenance | Apoptosis                 | Apoptosis of T lymphocytes                           | $2.71 \times 10^{-3}$ | <i>CDKN2A, CXCL12, IL7R, RAC2, TGFB1, TNFRSF6B</i>                    | 6 |
| Cellular function and maintenance | Cytostasis                | Cytostasis of colon cancer cell lines                | $2.91 \times 10^{-3}$ | <i>CD24, CDH1, TGFB1</i>                                              | 3 |
| Cellular function and maintenance | Cytostasis                | Cytostasis of eukaryotic cells                       | $3.66 \times 10^{-3}$ | <i>BMP7, CD24, CDH1, CDKN2A, EGFR, ID2, IFI16, TGFB1</i>              | 8 |
| Cellular function and maintenance | Cytostasis                | Cytostasis of epithelial cell lines                  | $5.04 \times 10^{-3}$ | <i>EGFR, TGFB1</i>                                                    | 2 |
| Cellular function and maintenance | Cytostasis                | Cytostasis of tumor cell lines                       | $7.07 \times 10^{-3}$ | <i>BMP7, CD24, CDH1, EGFR, IFI16, TGFB1</i>                           | 6 |

|                                               |                               |                                                |                       |                                                                       |   |
|-----------------------------------------------|-------------------------------|------------------------------------------------|-----------------------|-----------------------------------------------------------------------|---|
| Cellular function and maintenance             | Cytostasis                    | Cytostasis of normal cells                     | $1.03 \times 10^{-2}$ | <i>CDKN2A, ID2, TGFB1</i>                                             | 3 |
| Cellular function and maintenance             | Induction                     | Induction of T lymphocytes                     | $3.07 \times 10^{-3}$ | <i>IL18, MUC1</i>                                                     | 2 |
| Cellular function and maintenance             | Activation-induced cell death | Activation-induced cell death of T lymphocytes | $1.35 \times 10^{-2}$ | <i>RAC2, TGFB1</i>                                                    | 2 |
| Cell-mediated immune response                 | Differentiation               | Differentiation of T lymphocytes               | $2.81 \times 10^{-4}$ | <i>CDKN2A, CXCL12, GATA3, IL18, MUC1, TGFB1</i>                       | 6 |
| Cell-mediated immune response                 | Differentiation               | Differentiation of Th2 cells                   | $5.04 \times 10^{-3}$ | <i>GATA3, TGFB1</i>                                                   | 2 |
| Cell-mediated immune response                 | Development                   | T cell development                             | $1.70 \times 10^{-3}$ | <i>CDKN2A, CXCL12, GATA3, IL18, IL7R, MUC1, RAC2, TGFB1, TNFRSF6B</i> | 9 |
| Cell-mediated immune response                 | Adhesion                      | Adhesion of T lymphocytes                      | $2.12 \times 10^{-3}$ | <i>CXCL12, FN1, ICAM1, ICAM2, RASGRP1</i>                             | 5 |
| Cell-mediated immune response                 | Apoptosis                     | Apoptosis of T lymphocytes                     | $2.71 \times 10^{-3}$ | <i>CDKN2A, CXCL12, IL7R, RAC2, TGFB1, TNFRSF6B</i>                    | 6 |
| Cell-mediated immune response                 | Induction                     | Induction of T lymphocytes                     | $3.07 \times 10^{-3}$ | <i>IL18, MUC1</i>                                                     | 2 |
| Cell-mediated immune response                 | Activation-induced cell death | Activation-induced cell death of T lymphocytes | $1.35 \times 10^{-2}$ | <i>RAC2, TGFB1</i>                                                    | 2 |
| Hematological system development and function | Differentiation               | Differentiation of T lymphocytes               | $2.81 \times 10^{-4}$ | <i>CDKN2A, CXCL12, GATA3, IL18, MUC1, TGFB1</i>                       | 6 |
| Hematological system development and function | Differentiation               | Differentiation of mononuclear leukocytes      | $4.13 \times 10^{-3}$ | <i>CDKN2A, CXCL12, GATA3, IFI16, IL18, MUC1, TGFB1</i>                | 7 |

|                                                         |                 |                                        |                       |                                                                                          |    |
|---------------------------------------------------------|-----------------|----------------------------------------|-----------------------|------------------------------------------------------------------------------------------|----|
| Hematologica<br>I system<br>development<br>and function | Differentiation | Differentiation of<br>Th2 cells        | $5.04 \times 10^{-3}$ | <i>GATA3, TGFB1</i>                                                                      | 2  |
| Hematologica<br>I system<br>development<br>and function | Differentiation | Differentiation of<br>blood cells      | $1.69 \times 10^{-2}$ | <i>CDKN2A, CXCL12, GATA3, IFI16, IL18, MAFB, MUC1, MYB (includes<br/>EG:4602), TGFB1</i> | 9  |
| Hematologica<br>I system<br>development<br>and function | Adhesion        | Adhesion of<br>lymphocytes             | $1.07 \times 10^{-3}$ | <i>CXCL12, FN1, ICAM1, ICAM2, RASGRP1, TGFB1</i>                                         | 6  |
| Hematologica<br>I system<br>development<br>and function | Adhesion        | Adhesion of<br>leukocytes              | $1.19 \times 10^{-3}$ | <i>ANXA1, CXCL12, FN1, ICAM1, ICAM2, PLTP, RASGRP1, RLN2,<br/>TGFB1</i>                  | 9  |
| Hematologica<br>I system<br>development<br>and function | Adhesion        | Adhesion of T<br>lymphocytes           | $2.12 \times 10^{-3}$ | <i>CXCL12, FN1, ICAM1, ICAM2, RASGRP1</i>                                                | 5  |
| Hematologica<br>I system<br>development<br>and function | Adhesion        | Adhesion of<br>leukocyte cell<br>lines | $1.34 \times 10^{-2}$ | <i>ANXA1, TGFB1, TGM2</i>                                                                | 3  |
| Hematologica<br>I system<br>development<br>and function | Development     | T cell<br>development                  | $1.70 \times 10^{-3}$ | <i>CDKN2A, CXCL12, GATA3, IL18, IL7R, MUC1, RAC2, TGFB1,<br/>TNFRSF6B</i>                | 9  |
| Hematologica<br>I system<br>development<br>and function | Development     | Development of<br>blood cells          | $2.13 \times 10^{-3}$ | <i>CDKN2A, CXCL12, EGFR, GATA3, IL18, IL7R, MUC1, RAC2, TGFB1,<br/>TNFRSF6B</i>          | 10 |
| Hematologica<br>I system<br>development<br>and function | Apoptosis       | Apoptosis of T<br>lymphocytes          | $2.71 \times 10^{-3}$ | <i>CDKN2A, CXCL12, IL7R, RAC2, TGFB1, TNFRSF6B</i>                                       | 6  |
| Hematologica<br>I system<br>development<br>and function | Induction       | Induction of T<br>lymphocytes          | $3.07 \times 10^{-3}$ | <i>IL18, MUC1</i>                                                                        | 2  |

|                                               |                               |                                                |                       |                                                            |   |
|-----------------------------------------------|-------------------------------|------------------------------------------------|-----------------------|------------------------------------------------------------|---|
| Hematological system development and function | Binding                       | Binding of blood platelets                     | $1.18 \times 10^{-2}$ | <i>CD24, FN1, ICAM1</i>                                    | 3 |
| Hematological system development and function | Proliferation                 | Proliferation of T lymphocytes                 | $1.28 \times 10^{-2}$ | <i>CD24, CDKN2A, CXCL12, FN1, ICAM1, IL18, IL7R, TGFB1</i> | 8 |
| Hematological system development and function | Activation                    | Activation of leukocyte cell lines             | $1.35 \times 10^{-2}$ | <i>B2M, TNFRSF6B</i>                                       | 2 |
| Hematological system development and function | Activation-induced cell death | Activation-induced cell death of T lymphocytes | $1.35 \times 10^{-2}$ | <i>RAC2, TGFB1</i>                                         | 2 |
| Hematological system development and function | Co-stimulation                | Co-stimulation of T lymphocytes                | $1.35 \times 10^{-2}$ | <i>CD24, FN1</i>                                           | 2 |
| Cellular assembly and organization            | Organization                  | Organization of cytoskeleton                   | $3.23 \times 10^{-4}$ | <i>CXCL12, FN1, FSCN1, ICAM1, PLS3, SDC2</i>               | 6 |
| Cellular assembly and organization            | Organization                  | Organization of actin cytoskeleton             | $3.64 \times 10^{-3}$ | <i>CXCL12, FN1, FSCN1, ICAM1</i>                           | 4 |
| Cellular assembly and organization            | Rearrangement                 | Rearrangement of cytoskeleton                  | $9.96 \times 10^{-4}$ | <i>CTGF, CXCL12, RET, TGFB1</i>                            | 4 |
| Cellular assembly and organization            | Association                   | Association of cytoskeleton                    | $1.56 \times 10^{-3}$ | <i>CXCL12, FXYD5</i>                                       | 2 |
| Cellular assembly and organization            | Formation                     | Formation of cell-matrix contacts              | $1.56 \times 10^{-3}$ | <i>CDH1, FN1</i>                                           | 2 |
| Cellular assembly and organization            | Formation                     | Formation of cellular inclusion bodies         | $1.71 \times 10^{-2}$ | <i>SNCA, WWOX</i>                                          | 2 |
| Cellular assembly and organization            | Quantity                      | Quantity of intercellular junctions            | $1.56 \times 10^{-3}$ | <i>CDH1, GDF15</i>                                         | 2 |

|                                    |                            |                                         |                       |                                                                                                                                                                                                                                                                                                                                                                                                                                                                                                               |    |
|------------------------------------|----------------------------|-----------------------------------------|-----------------------|---------------------------------------------------------------------------------------------------------------------------------------------------------------------------------------------------------------------------------------------------------------------------------------------------------------------------------------------------------------------------------------------------------------------------------------------------------------------------------------------------------------|----|
| Cellular assembly and organization | Quantity                   | Quantity of neurites                    | $5.04 \times 10^{-3}$ | <i>ESR1, SNCA</i>                                                                                                                                                                                                                                                                                                                                                                                                                                                                                             | 2  |
| Cellular assembly and organization | Quantity                   | Quantity of plasma membrane projections | $1.03 \times 10^{-2}$ | <i>BST2, ESR1, SNCA</i>                                                                                                                                                                                                                                                                                                                                                                                                                                                                                       | 3  |
| Cellular assembly and organization | Development                | Development of filaments                | $7.45 \times 10^{-3}$ | <i>CRYAB, TGFB1</i>                                                                                                                                                                                                                                                                                                                                                                                                                                                                                           | 2  |
| Connective tissue disorders        | Connective tissue disorder | Connective tissue disorder              | $3.55 \times 10^{-4}$ | <i>ABCB1, AKAP2, AREG, B2M, BCAT1, BDNF, BTG3, C6ORF97, CALCR, CALD1, CD24, CDA, CDH1, CDH2, CDKN2A, COL1A1, COL21A1, COL4A1, COL4A2, COL6A1, COL6A2, COMMD10, CRYAB, CXCL12, EFEMP2, ESR1, FN1, FYN, GALNT3, GLUL, GPD1L, HIST1H2AC, HNMT, ICAM1, IL18, IL7R, IRS1, LDHB, LOX, MMP1 (includes EG:4312), MPPED2 (includes EG:744), MTUS1, NCOA3, NEBL, PBX1, PIK3R3, PTPRK, RB1, RCN1, SERPINA3, SERTAD2, SLC24A3, SNCA, STXBP6, TFPI2, TGFB1, TGFB1, TPD52L1, TPM2, TUBB2A, UBB, UBE2L6, VAV3, VIM, WWOX</i> | 65 |
| Connective tissue disorders        | Dupuytren contracture      | Dupuytren contracture                   | $1.20 \times 10^{-3}$ | <i>COL1A1, COL21A1, COL4A1, COL4A2, COL6A1, COL6A2, MMP1 (includes EG:4312)</i>                                                                                                                                                                                                                                                                                                                                                                                                                               | 7  |
| Connective tissue disorders        | Synovitis                  | Synovitis                               | $1.74 \times 10^{-3}$ | <i>B2M, EFEMP2, TGFB1</i>                                                                                                                                                                                                                                                                                                                                                                                                                                                                                     | 3  |
| Connective tissue disorders        | Rheumatic disease          | Rheumatic disease                       | $2.20 \times 10^{-3}$ | <i>ABCB1, AKAP2, AREG, B2M, BCAT1, BDNF, BTG3, C6ORF97, CALCR, CALD1, CD24, CDA, CDH1, CDH2, CDKN2A, COL4A1, COL6A1, COMMD10, CRYAB, CXCL12, EFEMP2, ESR1, FN1, FYN, GLUL, GPD1L, HIST1H2AC, HNMT, ICAM1, IL18, IL7R, IRS1, LDHB, LOX, MMP1 (includes EG:4312), MPPED2 (includes EG:744), MTUS1, NCOA3, NEBL, PBX1, PIK3R3, PTPRK, RB1, RCN1, SERPINA3, SERTAD2, SLC24A3, SNCA, STXBP6, TFPI2, TGFB1, TPD52L1, TPM2, TUBB2A, UBB, UBE2L6, VAV3, VIM, WWOX</i>                                                 | 59 |
| Connective tissue disorders        | Arthritis                  | Arthritis                               | $2.23 \times 10^{-3}$ | <i>ABCB1, AKAP2, AREG, B2M, BCAT1, BDNF, BTG3, C6ORF97, CALCR, CALD1, CD24, CDA, CDH1, CDH2, CDKN2A, COL4A1, COL6A1, COMMD10, CRYAB, CXCL12, EFEMP2, FYN, GLUL, GPD1L, HIST1H2AC, HNMT, ICAM1, IL18, IL7R, IRS1, LDHB, LOX, MMP1 (includes EG:4312), MPPED2 (includes EG:744), MTUS1, NCOA3, NEBL, PBX1, PIK3R3, PTPRK, RB1, RCN1, SERPINA3, SERTAD2, SLC24A3, SNCA, STXBP6, TFPI2, TGFB1, TPD52L1, TPM2, TUBB2A, UBB, UBE2L6, VAV3, VIM, WWOX</i>                                                            | 57 |

|                                 |                                       |                                          |                       |                                                                                                                                                                                                                                                                                                                                                                                                                                                                                                                                                                                                                                                                                                                                                                                             |    |
|---------------------------------|---------------------------------------|------------------------------------------|-----------------------|---------------------------------------------------------------------------------------------------------------------------------------------------------------------------------------------------------------------------------------------------------------------------------------------------------------------------------------------------------------------------------------------------------------------------------------------------------------------------------------------------------------------------------------------------------------------------------------------------------------------------------------------------------------------------------------------------------------------------------------------------------------------------------------------|----|
| Connective tissue disorders     | Osteoarthritis                        | Osteoarthritis                           | $6.62 \times 10^{-3}$ | <i>CRYAB, EFEMP2, IL18, MMP1</i> (includes <i>EG:4312</i> ), <i>TFPI2, TGFB1</i>                                                                                                                                                                                                                                                                                                                                                                                                                                                                                                                                                                                                                                                                                                            | 6  |
| Skeletal and muscular disorders | Skeletal and muscular disorder        | Skeletal and muscular disorder           | $3.75 \times 10^{-4}$ | <i>ABAT, ABCB1, AKAP2, AKT3, AREG, ATXN1, B2M, BCAT1, BDNF, BIN1, BTG3, C6ORF97, CA2, CALCR, CALD1, CD24, CDA, CDH1, CDH2, CDKN2A, CDS1, COCH, COL1A1, COL4A1, COL6A1, COL6A2, COMMD10, CRYAB, CXCL12, DKK3, EFEMP2, EML1</i> (includes <i>EG:2009</i> ), <i>ESR1, FN1, FYN, GJA1, GLUL, GNAL, GPD1L, HIST1H2AC, HIST2H2AA3, HNMT, ICAM1, ID4, IL18, IL7R, IRS1, ISOC1, LAMB1, LDHB, LOX, MAP1B, MGP, MMP1</i> (includes <i>EG:4312</i> ), <i>MPPED2</i> (includes <i>EG:744</i> ), <i>MSX2, MT1E, MTUS1, NCOA3, NEBL, PBX1, PDCD10, PDLIM4, PIK3R3, PSMB9, PTPRK, RAI14, RAMP3, RB1, RCN1, S100P, SCD, SCHIP1, SCUBE2, SERPINA3, SERPINE1, SERTAD2, SGCE, SLC16A1, SLC24A3, SNCA, SRPX, STXBP6, TFPI2, TGFB1, TGM2, TPD52L1, TPM2, TUBB2A, TUBB2B, UBB, UBE2L6, UCHL1, VAV3, VIM, WWOX</i> | 96 |
| Skeletal and muscular disorders | Skeletal and muscular disorder        | Skeletal and muscular disorder of humans | $9.99 \times 10^{-3}$ | <i>ATXN1, BDNF, CRYAB, SNCA</i>                                                                                                                                                                                                                                                                                                                                                                                                                                                                                                                                                                                                                                                                                                                                                             | 4  |
| Skeletal and muscular disorders | Osteoporosis                          | Osteoporosis                             | $6.49 \times 10^{-4}$ | <i>CA2, CALCR, COL1A1, ESR1, PDLIM4</i>                                                                                                                                                                                                                                                                                                                                                                                                                                                                                                                                                                                                                                                                                                                                                     | 5  |
| Skeletal and muscular disorders | Bethlem myopathy                      | Bethlem myopathy                         | $1.56 \times 10^{-3}$ | <i>COL6A1, COL6A2</i>                                                                                                                                                                                                                                                                                                                                                                                                                                                                                                                                                                                                                                                                                                                                                                       | 2  |
| Skeletal and muscular disorders | Ullrich congenital muscular dystrophy | Ullrich congenital muscular dystrophy    | $1.56 \times 10^{-3}$ | <i>COL6A1, COL6A2</i>                                                                                                                                                                                                                                                                                                                                                                                                                                                                                                                                                                                                                                                                                                                                                                       | 2  |
| Skeletal and muscular disorders | Osteosarcoma                          | Osteosarcoma                             | $1.68 \times 10^{-3}$ | <i>CDKN2A, FYN, RB1, SDC2, SPARC</i>                                                                                                                                                                                                                                                                                                                                                                                                                                                                                                                                                                                                                                                                                                                                                        | 5  |
| Skeletal and muscular disorders | Rheumatic disease                     | Rheumatic disease                        | $2.20 \times 10^{-3}$ | <i>ABCB1, AKAP2, AREG, B2M, BCAT1, BDNF, BTG3, C6ORF97, CALCR, CALD1, CD24, CDA, CDH1, CDH2, CDKN2A, COL4A1, COL6A1, COMMD10, CRYAB, CXCL12, EFEMP2, ESR1, FN1, FYN, GLUL, GPD1L, HIST1H2AC, HNMT, ICAM1, IL18, IL7R, IRS1, LDHB, LOX, MMP1</i> (includes <i>EG:4312</i> ), <i>MPPED2</i> (includes <i>EG:744</i> ), <i>MTUS1, NCOA3, NEBL, PBX1, PIK3R3, PTPRK, RB1, RCN1, SERPINA3, SERTAD2, SLC24A3, SNCA, STXBP6, TFPI2, TGFB1, TPD52L1, TPM2, TUBB2A, UBB, UBE2L6, VAV3, VIM, WWOX</i>                                                                                                                                                                                                                                                                                                 | 59 |

|                                              |                                |                                    |                       |                                                                                                                                                                                                                                                                                                                                                                                                                                                    |    |
|----------------------------------------------|--------------------------------|------------------------------------|-----------------------|----------------------------------------------------------------------------------------------------------------------------------------------------------------------------------------------------------------------------------------------------------------------------------------------------------------------------------------------------------------------------------------------------------------------------------------------------|----|
| Skeletal and muscular disorders              | Arthritis                      | Arthritis                          | $2.23 \times 10^{-3}$ | <i>ABCB1, AKAP2, AREG, B2M, BCAT1, BDNF, BTG3, C6ORF97, CALCR, CALD1, CD24, CDA, CDH1, CDH2, CDKN2A, COL4A1, COL6A1, COMMD10, CRYAB, CXCL12, EFEMP2, FYN, GLUL, GPD1L, HIST1H2AC, HNMT, ICAM1, IL18, IL7R, IRS1, LDHB, LOX, MMP1 (includes EG:4312), MPPED2 (includes EG:744), MTUS1, NCOA3, NEBL, PBX1, PIK3R3, PTPRK, RB1, RCN1, SERPINA3, SERTAD2, SLC24A3, SNCA, STXBP6, TFPI2, TGFB1, TPD52L1, TPM2, TUBB2A, UBB, UBE2L6, VAV3, VIM, WWOX</i> | 57 |
| Skeletal and muscular disorders              | Bone tumor                     | Bone tumor                         | $2.42 \times 10^{-3}$ | <i>ADA, CDKN2A, EXT1, FYN, RB1, RET, SDC2, SPARC</i>                                                                                                                                                                                                                                                                                                                                                                                               | 8  |
| Skeletal and muscular disorders              | Osteoarthritis                 | Osteoarthritis                     | $6.62 \times 10^{-3}$ | <i>CRYAB, EFEMP2, IL18, MMP1 (includes EG:4312), TFPI2, TGFB1</i>                                                                                                                                                                                                                                                                                                                                                                                  | 6  |
| Skeletal and muscular disorders              | Leiomyosarcoma                 | Leiomyosarcoma                     | $7.40 \times 10^{-3}$ | <i>CDKN2A, FYN, HMGA1, RET</i>                                                                                                                                                                                                                                                                                                                                                                                                                     | 4  |
| Skeletal and muscular disorders              | Progressive supranuclear palsy | Progressive supranuclear palsy     | $9.07 \times 10^{-3}$ | <i>ABAT, SERPINA3, TGM2, UBB</i>                                                                                                                                                                                                                                                                                                                                                                                                                   | 4  |
| Skeletal and muscular disorders              | Myosarcoma                     | Myosarcoma                         | $1.06 \times 10^{-2}$ | <i>CDKN2A, FYN, HMGA1, RET, TUBB2A</i>                                                                                                                                                                                                                                                                                                                                                                                                             | 5  |
| Skeletal and muscular disorders              | Chondrosarcoma                 | Chondrosarcoma                     | $1.35 \times 10^{-2}$ | <i>EXT1, FYN</i>                                                                                                                                                                                                                                                                                                                                                                                                                                   | 2  |
| Skeletal and muscular disorders              | Postmenopausal osteoporosis    | Postmenopausal osteoporosis        | $1.35 \times 10^{-2}$ | <i>CALCR, ESR1</i>                                                                                                                                                                                                                                                                                                                                                                                                                                 | 2  |
| Inflammatory response                        | Migration                      | Migration of neutrophils           | $3.97 \times 10^{-4}$ | <i>ANXA1, FN1, ICAM1, SERPINE1, TGFB1</i>                                                                                                                                                                                                                                                                                                                                                                                                          | 5  |
| Inflammatory response                        | Binding                        | Binding of blood platelets         | $1.18 \times 10^{-2}$ | <i>CD24, FN1, ICAM1</i>                                                                                                                                                                                                                                                                                                                                                                                                                            | 3  |
| Reproductive system development and function | Proliferation                  | Proliferation of breast cell lines | $4.02 \times 10^{-4}$ | <i>CDH1, IGFBP3, LOX, TGFB1</i>                                                                                                                                                                                                                                                                                                                                                                                                                    | 4  |
| Reproductive system development and function | Morphology                     | Morphology of gonadal cell lines   | $1.35 \times 10^{-2}$ | <i>PEG10, SERPINE1</i>                                                                                                                                                                                                                                                                                                                                                                                                                             | 2  |

|                        |                        |                                             |                       |                                                                                                                                                                                                                                                                                                                                                                                                                                                                                                                                                                                          |    |
|------------------------|------------------------|---------------------------------------------|-----------------------|------------------------------------------------------------------------------------------------------------------------------------------------------------------------------------------------------------------------------------------------------------------------------------------------------------------------------------------------------------------------------------------------------------------------------------------------------------------------------------------------------------------------------------------------------------------------------------------|----|
| Immunologic al disease | Immunodeficiency       | Immunodeficiency                            | $4.78 \times 10^{-4}$ | <i>ADA, B2M, IL7R, MLPH, RAC2, RASGRP1</i>                                                                                                                                                                                                                                                                                                                                                                                                                                                                                                                                               | 6  |
| Immunologic al disease | Immunological disorder | Immunological disorder                      | $8.94 \times 10^{-3}$ | <i>ABAT, ABCB1, ADA, ADCY1, AKAP2, ANK3, APPBP2, AREG, ATXN1, B2M, BCAT1, BTG3, C6ORF97, CALCR, CALD1, CD24, CDA, CDH1, CDH2, COL4A1, COMMD10, CXCL12, ESR1, FNDC3B, FYN, GFRA1, GLUL, GNA14, GNAL, GPD1L, GRHL2, HIST1H2AC, HIST1H4H (includes EG:8365), HNMT, ICAM1, IGFBP3, IL18, IL7R, IRS1, KRT7, LDHB, LOX, MLPH, MPPED2 (includes EG:744), MTUS1, NCOA3, NEBL, NRCAM, PBX1, PIK3R3, PSMB9, PTPRK, RAC2, RAI14, RASGRP1, RB1, RCN1, RET, SERPINA3, SERTAD2, SLC24A3, SNCA, SNRPN, STXBP6, TGFB1, TGM2, TNFRSF6B, TPD52L1, TPM2, TUBB2A, UBE2L6, VAV3, VIM, WNT5A, WWOX, ZNF395</i> | 76 |
| Behavior               | Locomotion             | Locomotion of eukaryotic cells              | $5.28 \times 10^{-4}$ | <i>CXCL12, TGFB1</i>                                                                                                                                                                                                                                                                                                                                                                                                                                                                                                                                                                     | 2  |
| Gene expression        | Bending                | Bending of dna                              | $5.28 \times 10^{-4}$ | <i>ESR1, TFF1</i>                                                                                                                                                                                                                                                                                                                                                                                                                                                                                                                                                                        | 2  |
| Gene expression        | Activation             | Activation of ap1 response element          | $9.15 \times 10^{-4}$ | <i>ESR1, IL18, MMP1 (includes EG:4312)</i>                                                                                                                                                                                                                                                                                                                                                                                                                                                                                                                                               | 3  |
| Gene expression        | Activation             | Activation of CAGA box                      | $7.45 \times 10^{-3}$ | <i>CREBBP, TGFB1</i>                                                                                                                                                                                                                                                                                                                                                                                                                                                                                                                                                                     | 2  |
| Gene expression        | Activation             | Activation of SMAD binding sequence         | $1.03 \times 10^{-2}$ | <i>TGFB1, TGFB1I1</i>                                                                                                                                                                                                                                                                                                                                                                                                                                                                                                                                                                    | 2  |
| Gene expression        | Activation             | Activation of TGF- $\beta$ response element | $1.03 \times 10^{-2}$ | <i>BMP7, TGFB1</i>                                                                                                                                                                                                                                                                                                                                                                                                                                                                                                                                                                       | 2  |
| Gene expression        | Expression             | Expression of SP1 binding site              | $4.47 \times 10^{-3}$ | <i>ESR1, RB1, TGFB1</i>                                                                                                                                                                                                                                                                                                                                                                                                                                                                                                                                                                  | 3  |
| Gene expression        | Transcription          | Transcription of chromatin templates        | $5.04 \times 10^{-3}$ | <i>CREBBP, ESR1</i>                                                                                                                                                                                                                                                                                                                                                                                                                                                                                                                                                                      | 2  |
| Gene expression        | Transcription          | Transcription of AP1 consensus site         | $1.03 \times 10^{-2}$ | <i>ESR1, TGFB1</i>                                                                                                                                                                                                                                                                                                                                                                                                                                                                                                                                                                       | 2  |
| Gene expression        | Transcription          | Transcription of TATA box                   | $1.35 \times 10^{-2}$ | <i>ESR1, RB1</i>                                                                                                                                                                                                                                                                                                                                                                                                                                                                                                                                                                         | 2  |
| Gene expression        | Binding                | Binding of AP1 consensus site               | $1.18 \times 10^{-2}$ | <i>CXCL12, GPX1, TGFB1</i>                                                                                                                                                                                                                                                                                                                                                                                                                                                                                                                                                               | 3  |
| Gene expression        | Repression             | Repression of gene                          | $1.55 \times 10^{-2}$ | <i>ESR1, FHL2, FOXG1, RB1</i>                                                                                                                                                                                                                                                                                                                                                                                                                                                                                                                                                            | 4  |

|                                         |                                    |                                    |                       |                                                    |   |
|-----------------------------------------|------------------------------------|------------------------------------|-----------------------|----------------------------------------------------|---|
| Nervous system development and function | Chemotaxis                         | Chemotaxis of granule cells        | $5.28 \times 10^{-4}$ | <i>BDNF, CXCL12</i>                                | 2 |
| Nervous system development and function | Chemotaxis                         | Chemotaxis of microglia            | $5.04 \times 10^{-3}$ | <i>TGFB1, TNFRSF6B</i>                             | 2 |
| Nervous system development and function | Quantity                           | Quantity of neuritis               | $5.04 \times 10^{-3}$ | <i>ESR1, SNCA</i>                                  | 2 |
| Nervous system development and function | Length                             | Length of neuritis                 | $7.45 \times 10^{-3}$ | <i>BDNF, ESR1</i>                                  | 2 |
| Nervous system development and function | Development                        | Development of nervous system      | $8.70 \times 10^{-3}$ | <i>FOXP1, GSTP1, MAFB, PDGFC, SNCA, SOX3, ZIC1</i> | 7 |
| Metabolic disease                       | Light chain associated amyloidosis | Light chain-associated amyloidosis | $9.96 \times 10^{-4}$ | <i>CXCL12, IGFBP5, RB1, TGFB1</i>                  | 4 |
| Metabolic disease                       | Gestational diabetes mellitus      | Gestational diabetes mellitus      | $7.45 \times 10^{-3}$ | <i>IRS1, PIK3R1</i>                                | 2 |
| Metabolic disease                       | Diabetes                           | Diabetes of mice                   | $1.03 \times 10^{-2}$ | <i>B2M, IGFBP3</i>                                 | 2 |
| Carbohydrate metabolism                 | Synthesis                          | Synthesis of polysaccharide        | $1.18 \times 10^{-3}$ | <i>CTGF, EXT1, IGFBP3, IRS1, TGFB1, UGDH</i>       | 6 |
| Carbohydrate metabolism                 | Synthesis                          | Synthesis of proteoglycan          | $4.47 \times 10^{-3}$ | <i>CTGF, EXT1, TGFB1</i>                           | 3 |
| Carbohydrate metabolism                 | Synthesis                          | Synthesis of carbohydrate          | $6.28 \times 10^{-3}$ | <i>CTGF, EXT1, IGFBP3, IRS1, TGFB1, UGDH, XBP1</i> | 7 |
| Carbohydrate metabolism                 | Accumulation                       | Accumulation of doxorubicin        | $3.07 \times 10^{-3}$ | <i>ABCB1, DNAJC15</i>                              | 2 |
| Carbohydrate metabolism                 | Release                            | Release of polysaccharide          | $3.07 \times 10^{-3}$ | <i>FN1, IL18</i>                                   | 2 |
| Carbohydrate metabolism                 | Release                            | Release of carbohydrate            | $7.62 \times 10^{-3}$ | <i>ABCB1, FN1, IL18</i>                            | 3 |

|                         |                             |                                           |                       |                                                                                                                                                                                                                                                                                                                                                                                                                                                               |    |
|-------------------------|-----------------------------|-------------------------------------------|-----------------------|---------------------------------------------------------------------------------------------------------------------------------------------------------------------------------------------------------------------------------------------------------------------------------------------------------------------------------------------------------------------------------------------------------------------------------------------------------------|----|
| Carbohydrate metabolism | Metabolism                  | Metabolism of <i>N</i> -acetylglucosamine | $1.35 \times 10^{-2}$ | <i>CHST6, EXTL2</i>                                                                                                                                                                                                                                                                                                                                                                                                                                           | 2  |
| Embryonic development   | Transdifferentiation        | Transdifferentiation of mesenchymal cells | $1.56 \times 10^{-3}$ | <i>COL4A1, TGFB1</i>                                                                                                                                                                                                                                                                                                                                                                                                                                          | 2  |
| Embryonic development   | Adhesion                    | Adhesion of embryonic cell lines          | $5.41 \times 10^{-3}$ | <i>FN1, ICAM1, RRAS</i>                                                                                                                                                                                                                                                                                                                                                                                                                                       | 3  |
| Embryonic development   | Apoptosis                   | Apoptosis of embryonic cells              | $1.03 \times 10^{-2}$ | <i>BMP7, TNFRSF6B</i>                                                                                                                                                                                                                                                                                                                                                                                                                                         | 2  |
| Embryonic development   | Morphology                  | Morphology of embryonic cell lines        | $1.35 \times 10^{-2}$ | <i>IGFBP3, SERPINE1</i>                                                                                                                                                                                                                                                                                                                                                                                                                                       | 2  |
| Inflammatory disease    | Adult onset still's disease | Adult-onset Stills disease                | $1.56 \times 10^{-3}$ | <i>ICAM1, IL18</i>                                                                                                                                                                                                                                                                                                                                                                                                                                            | 2  |
| Inflammatory disease    | Synovitis                   | Synovitis                                 | $1.74 \times 10^{-3}$ | <i>B2M, EFEMP2, TGFB1</i>                                                                                                                                                                                                                                                                                                                                                                                                                                     | 3  |
| Inflammatory disease    | Rheumatic disease           | Rheumatic disease                         | $2.20 \times 10^{-3}$ | <i>ABCB1, AKAP2, AREG, B2M, BCAT1, BDNF, BTG3, C6ORF97, CALCR, CALD1, CD24, CDA, CDH1, CDH2, CDKN2A, COL4A1, COL6A1, COMMD10, CRYAB, CXCL12, EFEMP2, ESR1, FN1, FYN, GLUL, GPD1L, HIST1H2AC, HNMT, ICAM1, IL18, IL7R, IRS1, LDHB, LOX, MMP1 (includes EG:4312), MPPED2 (includes EG:744), MTUS1, NCOA3, NEBL, PBX1, PIK3R3, PTPRK, RB1, RCN1, SERPINA3, SERTAD2, SLC24A3, SNCA, STXBP6, TFPI2, TGFB1, TPD52L1, TPM2, TUBB2A, UBB, UBE2L6, VAV3, VIM, WWOX</i> | 59 |
| Inflammatory disease    | Arthritis                   | Arthritis                                 | $2.23 \times 10^{-3}$ | <i>ABCB1, AKAP2, AREG, B2M, BCAT1, BDNF, BTG3, C6ORF97, CALCR, CALD1, CD24, CDA, CDH1, CDH2, CDKN2A, COL4A1, COL6A1, COMMD10, CRYAB, CXCL12, EFEMP2, FYN, GLUL, GPD1L, HIST1H2AC, HNMT, ICAM1, IL18, IL7R, IRS1, LDHB, LOX, MMP1 (includes EG:4312), MPPED2 (includes EG:744), MTUS1, NCOA3, NEBL, PBX1, PIK3R3, PTPRK, RB1, RCN1, SERPINA3, SERTAD2, SLC24A3, SNCA, STXBP6, TFPI2, TGFB1, TPD52L1, TPM2, TUBB2A, UBB, UBE2L6, VAV3, VIM, WWOX</i>            | 57 |
| Inflammatory disease    | Osteoarthritis              | Osteoarthritis                            | $6.62 \times 10^{-3}$ | <i>CRYAB, EFEMP2, IL18, MMP1 (includes EG:4312), TFPI2, TGFB1</i>                                                                                                                                                                                                                                                                                                                                                                                             | 6  |

|                                                       |                       |                                       |                       |                                                                                                                                                                                                                                                                                                                                                                                                                                                                                                                                                                                                                                                                                                |    |
|-------------------------------------------------------|-----------------------|---------------------------------------|-----------------------|------------------------------------------------------------------------------------------------------------------------------------------------------------------------------------------------------------------------------------------------------------------------------------------------------------------------------------------------------------------------------------------------------------------------------------------------------------------------------------------------------------------------------------------------------------------------------------------------------------------------------------------------------------------------------------------------|----|
| Inflammatory disease                                  | Inflammatory disorder | Inflammatory disorder                 | $8.03 \times 10^{-3}$ | <i>ABCB1, ADA, AKAP2, AREG, ATXN1, B2M, BCAS3, BCAT1, BDNF, BTG3, C6ORF97, CA2, CALCR, CALD1, CD24, CDA, CDH1, CDH2, CDKN2A, COCH, COL4A1, COL4A2, COL6A1, COMMD10, CREBBP, CRYAB, CXCL12, DKK3, EFEMP2, EGFR, EML1 (includes EG:2009), ESR1, FN1, FYN, GATA3, GFRA1, GLUL, GPD1L, HIST1H2AC, HNMT, ICAM1, IGFBP3, IL18, IL7R, IRS1, KYNU, LDHB, LEPREL1, LOX, LPHN2, MMP1 (includes EG:4312), MPPED2 (includes EG:744), MTUS1, MUC1, NCOA3, NEBL, ORC5L, PBX1, PIK3R3, PTPRK, PTRF, RB1, RBM47, RCN1, SELENBP1, SERPINA3, SERPINB7, SERPINE1, SERPINE2, SERTAD2, SIDT1, SLC24A3, SNCA, SNRPN, STXBP6, TFPI2, TGFB1, TNFRSF6B, TPD52L1, TPM2, TUBB2A, UBB, UBE2L6, VAV3, VIM, WWOX, ZNF395</i> | 87 |
| Respiratory system development and function           | S phase               | Entry into S phase of lung cell lines | $1.56 \times 10^{-3}$ | <i>CDKN2A, NCOA3</i>                                                                                                                                                                                                                                                                                                                                                                                                                                                                                                                                                                                                                                                                           | 2  |
| Respiratory system development and function           | Proliferation         | Proliferation of lung cell lines      | $2.28 \times 10^{-3}$ | <i>CDKN2A, FN1, IFI16</i>                                                                                                                                                                                                                                                                                                                                                                                                                                                                                                                                                                                                                                                                      | 3  |
| Skeletal and muscular system development and function | Activation            | Activation of muscle cells            | $1.56 \times 10^{-3}$ | <i>TGFB1, TGM2</i>                                                                                                                                                                                                                                                                                                                                                                                                                                                                                                                                                                                                                                                                             | 2  |
| Skeletal and muscular system development and function | Ossification          | Ossification                          | $4.15 \times 10^{-3}$ | <i>BMP7, EXT1, MGP, SPARC</i>                                                                                                                                                                                                                                                                                                                                                                                                                                                                                                                                                                                                                                                                  | 4  |
| Skeletal and muscular system development and function | Differentiation       | Differentiation of muscle cells       | $1.34 \times 10^{-2}$ | <i>IGFBP3, RB1, TGFB1</i>                                                                                                                                                                                                                                                                                                                                                                                                                                                                                                                                                                                                                                                                      | 3  |
| Nucleic acid metabolism                               | Incorporation         | Incorporation of thymidine            | $2.12 \times 10^{-3}$ | <i>CDKN2A, EGFR, FN1, IGFBP5, TGFB1</i>                                                                                                                                                                                                                                                                                                                                                                                                                                                                                                                                                                                                                                                        | 5  |
| Small molecule biochemistry                           | Incorporation         | Incorporation of thymidine            | $2.12 \times 10^{-3}$ | <i>CDKN2A, EGFR, FN1, IGFBP5, TGFB1</i>                                                                                                                                                                                                                                                                                                                                                                                                                                                                                                                                                                                                                                                        | 5  |

|                             |                                                       |                                                       |                       |                                                      |   |
|-----------------------------|-------------------------------------------------------|-------------------------------------------------------|-----------------------|------------------------------------------------------|---|
| Small molecule biochemistry | Metabolism                                            | Metabolism of steroid                                 | $2.91 \times 10^{-3}$ | <i>AKR1C2, UGT2B15, WWOX</i>                         | 3 |
| Small molecule biochemistry | Metabolism                                            | Metabolism of <i>N</i> -acetylglucosamine             | $1.35 \times 10^{-2}$ | <i>CHST6, EXTL2</i>                                  | 2 |
| Small molecule biochemistry | Accumulation                                          | Accumulation of doxorubicin                           | $3.07 \times 10^{-3}$ | <i>ABCB1, DNAJC15</i>                                | 2 |
| Small molecule biochemistry | Synthesis                                             | Synthesis of proteoglycan                             | $4.47 \times 10^{-3}$ | <i>CTGF, EXT1, TGFB1</i>                             | 3 |
| Small molecule biochemistry | Quantity                                              | Quantity of eicosanoid                                | $1.52 \times 10^{-2}$ | <i>EGFR, IL18, TGFB1</i>                             | 3 |
| Auditory disease            | Nonsyndromic hearing impairment                       | Nonsyndromic hearing impairment                       | $2.28 \times 10^{-3}$ | <i>COCH, DFNA5, GRHL2</i>                            | 3 |
| Lipid metabolism            | Metabolism                                            | Metabolism of steroid                                 | $2.91 \times 10^{-3}$ | <i>AKR1C2, UGT2B15, WWOX</i>                         | 3 |
| Lipid metabolism            | Quantity                                              | Quantity of eicosanoid                                | $1.52 \times 10^{-2}$ | <i>EGFR, IL18, TGFB1</i>                             | 3 |
| Drug metabolism             | Accumulation                                          | Accumulation of doxorubicin                           | $3.07 \times 10^{-3}$ | <i>ABCB1, DNAJC15</i>                                | 2 |
| Molecular transport         | Accumulation                                          | Accumulation of doxorubicin                           | $3.07 \times 10^{-3}$ | <i>ABCB1, DNAJC15</i>                                | 2 |
| Molecular transport         | Uptake                                                | Uptake of phosphate                                   | $3.07 \times 10^{-3}$ | <i>STC1, TGFB1</i>                                   | 2 |
| Molecular transport         | Quantity                                              | Quantity of eicosanoid                                | $1.52 \times 10^{-2}$ | <i>EGFR, IL18, TGFB1</i>                             | 3 |
| Ophthalmic disease          | Gelatinous drop-like corneal dystrophy                | Gelatinous drop-like corneal dystrophy                | $3.07 \times 10^{-3}$ | <i>TACSTD2, TGFB1</i>                                | 2 |
| Organismal survival         | Survival                                              | Survival of humans                                    | $4.70 \times 10^{-3}$ | <i>EGFR, HMGA2, MYB (includes EG:4602), SERPINE1</i> | 4 |
| Cell signaling              | Insulin-like growth factor receptor signaling pathway | Insulin-like growth factor receptor signaling pathway | $5.04 \times 10^{-3}$ | <i>IRS1, PIK3R1</i>                                  | 2 |

|                                                      |                               |                                       |                       |                                                                                                                                                                |    |
|------------------------------------------------------|-------------------------------|---------------------------------------|-----------------------|----------------------------------------------------------------------------------------------------------------------------------------------------------------|----|
| Hair and skin development and function               | Cytostasis                    | Cytostasis of epithelial cell lines   | $5.04 \times 10^{-3}$ | <i>EGFR, TGFB1</i>                                                                                                                                             | 2  |
| Hair and skin development and function               | Proliferation                 | Proliferation of epidermal cells      | $6.46 \times 10^{-3}$ | <i>EGFR, PTPRK, TGFB1</i>                                                                                                                                      | 3  |
| Hair and skin development and function               | Differentiation               | Differentiation of keratinocytes      | $6.65 \times 10^{-3}$ | <i>ANXA1, CDH1, FN1, TGFB1</i>                                                                                                                                 | 4  |
| Hair and skin development and function               | Adhesion                      | Adhesion of keratinocytes             | $1.71 \times 10^{-2}$ | <i>CDH1, FN1</i>                                                                                                                                               | 2  |
| Endocrine system disorders                           | Gestational diabetes mellitus | Gestational diabetes mellitus         | $7.45 \times 10^{-3}$ | <i>IRS1, PIK3R1</i>                                                                                                                                            | 2  |
| Endocrine system disorders                           | Diabetes                      | Diabetes of mice                      | $1.03 \times 10^{-2}$ | <i>B2M, IGFBP3</i>                                                                                                                                             | 2  |
| Hematological disease                                | Hematological disorder        | Hematological disorder                | $9.69 \times 10^{-3}$ | <i>ADA, AKT3, B2M, BCAT1, BRIP1, CALCR, CALD1, COL4A1, CREBBP, CTGF, CXCL12, DUSP4, EGFR, ESR1, FN1, FYN, ICAM1, IGFBP3, IL7R, ORC5L, RET, SERPINE1, TGFB1</i> | 23 |
| Renal and urological disease                         | Renal cancer                  | Renal cancer                          | $9.69 \times 10^{-3}$ | <i>ABCB1, CDH1, EGFR, EPCAM, FN1, IL7R, RB1, RET, TUBB2A</i>                                                                                                   | 9  |
| Renal and urological disease                         | Renal-cell carcinoma          | Renal-cell carcinoma                  | $1.35 \times 10^{-2}$ | <i>ABCB1, CDH1, EGFR, FN1, RB1, RET, TUBB2A</i>                                                                                                                | 7  |
| Renal and urological system development and function | Activation                    | Activation of kidney cell lines       | $1.03 \times 10^{-2}$ | <i>TGFB1, TGM2</i>                                                                                                                                             | 2  |
| Protein synthesis                                    | Expression                    | Expression of protein                 | $1.06 \times 10^{-2}$ | <i>EGFR, EIF5A, FN1, PAIP1, TGFB1</i>                                                                                                                          | 5  |
| Free radical scavenging                              | Generation                    | Generation of reactive oxygen species | $1.10 \times 10^{-2}$ | <i>CRYAB, GPX1, MUC1, TGFB1</i>                                                                                                                                | 4  |
| Post-translational modification                      | Acetylation                   | Acetylation of protein                | $1.71 \times 10^{-2}$ | <i>CREBBP, SNCA</i>                                                                                                                                            | 2  |

\* EG = Entrez Gene number.

†Function is defined as the cellular, physiological, or disease process associated with the gene(s) displayed. Functional annotation was provided by Ingenuity Pathway Analysis software (Redwood City, CA). No. of molecules indicates the number of genes from our dataset that have the function listed.

‡ Ingenuity Pathways Analysis software (Redwood City, CA) was used to determine which biological relationships exist between the genes present in Supplementary Tables 1 and 2. The reference set for this analysis was the Ingenuity Knowledge Base (Genes only), and the network analysis was set to direct relationships. All data sources were used to obtain data from patients and all human cell lines and tissues. The stringent filter was also used. Seventy molecules per network and 25 networks were used for this analysis. The p-value associated with Functional Analysis for a dataset was calculated using the Fisher Exact Test. All statistical tests were two-sided.
