# Supplementary material
Source: PubMed Central journal article supplement (PMC2970576)
Supplement: supp_djq361_jnci-JNCI-09-1342-s08.pdf [file supp_djq361_jnci-JNCI-09-1342-s08.pdf]

**Supplementary Table 5.** Gene expression analysis of select pluripotency genes in CD44+/CD24– and CD44+/CD24+ MCF-7-ADR populations\*

| <b>Assay identification</b> | <b>Gene</b>   | <b>Fold change (95% CI)</b> | <b>P†</b> |
|-----------------------------|---------------|-----------------------------|-----------|
| Hs00742896_s1               | <i>POU5F1</i> | 0.81 (0.61 to 1.00)         | .29       |
| Hs00602736_s1               | <i>SOX2</i>   | 0.88 (0.16 to 1.60)         | .31       |
| Hs00162669_m1               | <i>TERT</i>   | 0.74 (0.40 to 1.07)         | .17       |
| Hs01062014_m1               | <i>NOTCH1</i> | 0.89 (0.67 to 1.11)         | .16       |
| Hs00702808_s1               | <i>LIN28</i>  | 1.01 (0.67 to 1.35)         | .50       |
| Hs02387400_g1               | <i>NANOG</i>  | 0.77 (0.24 to 1.30)         | .17       |
| Hs00358836_m1               | <i>KLF4</i>   | 0.89 (0.88 to 0.90)         | .35       |

\*The delta-delta cycle threshold method was used to determine the fold change of gene expression in CD44+/CD24– MCF-7-ADR cells compared with CD44+/CD24+ MCF-7-ADR cells. CI = confidence interval.

† Statistical significance was determined with unpaired Student *t* tests. *P* values less than .05 were considered statistically significant. All statistical tests were two-sided. Means and 95% CIs are reported.
