# Supplementary material
Source: PubMed Central journal article supplement (PMC2970576)
Supplement: supp_djq361_jnci-JNCI-09-1342-s09.pdf [file supp_djq361_jnci-JNCI-09-1342-s09.pdf]

**Supplementary Table 6. Multidrug resistance-linked genes profiled\***

| <b>Gene and function</b> | <b>Genbank account no.</b> | <b>Assay no.</b> |
|--------------------------|----------------------------|------------------|
| ABC transporter          |                            |                  |
| <i>ABCA1</i>             | NM_005502.2                | Hs00194045_m1    |
| <i>ABCA2</i>             | NM_001606.3                | Hs00242232_m1    |
| <i>ABCA3</i>             | NM_001089.1                | Hs00184543_m1    |
| <i>ABCA4</i>             | NM_000350.2                | Hs00184367_m1    |
| <i>ABCA5</i>             | NM_172232.1                | Hs00363322_m1    |
| <i>ABCA6</i>             | NM_080284.2                | Hs00365329_m1    |
| <i>ABCA7</i>             | NM_033308.1                | Hs00185303_m1    |
| <i>ABCA8</i>             | NM_007168.2                | Hs00200350_m1    |
| <i>ABCA9</i>             | NM_080283.3                | Hs00329320_m1    |
| <i>ABCA10</i>            | NM_080282.2                | Hs00365268_m1    |
| <i>ABCA12</i>            | NM_015657.3                | Hs00292421_m1    |
| <i>ABCA13</i>            | NM_152701.2                | Hs00541549_m1    |
| <i>ABCB1</i>             | NM_000927.3                | Hs00184491_m1    |
| <i>ABCB2</i>             | NM_000593.5                | Hs00388682_m1    |
| <i>ABCB3</i>             | NM_000544.3                | Hs00241066_m1    |
| <i>ABCB4</i>             | NM_000443.3                | Hs00240956_m1    |
| <i>ABCB5</i>             | NM_178559.3                | Hs00698751_m1    |
| <i>ABCB6</i>             | NM_005689.1                | Hs00180568_m1    |
| <i>ABCB7</i>             | NM_004299.3                | Hs00188776_m1    |
| <i>ABCB8</i>             | NM_007188.2                | Hs00185159_m1    |
| <i>ABCB9</i>             | NM_203444.1                | Hs00608640_m1    |
| <i>ABCB10</i>            | NM_012089.1                | Hs00429240_m1    |
| <i>ABCB11</i>            | NM_003742.2                | Hs00184824_m1    |
| <i>ABCC1</i>             | NM_004996.2                | Hs00219905_m1    |
| <i>ABCC2</i>             | NM_000392.1                | Hs00166123_m1    |
| <i>ABCC3</i>             | NM_003786.2                | Hs00358656_m1    |
| <i>ABCC4</i>             | NM_005845.2                | Hs00195260_m1    |
| <i>ABCC5</i>             | NM_005688.2                | Hs00981089_m1    |
| <i>ABCC6</i>             | NM_001171.2                | Hs00184566_m1    |
| <i>ABCC7</i>             | NM_000492.3                | Hs00357011_m1    |
| <i>ABCC8</i>             | NM_000352.2                | Hs00165861_m1    |
| <i>ABCC9</i>             | NM_005691.2                | Hs00245832_m1    |
| <i>ABCC10</i>            | NM_033450.2                | Hs00375716_m1    |
| <i>ABCC11</i>            | NM_032583.3                | Hs00261567_m1    |
| <i>ABCC12</i>            | NM_033226.2                | Hs00264354_m1    |
| <i>ABCD1</i>             | NM_000033.2                | Hs00163610_m1    |

|              |             |               |
|--------------|-------------|---------------|
| <i>ABCD2</i> | NM_005164.2 | Hs00193054_m1 |
| <i>ABCD3</i> | NM_002858.2 | Hs00161065_m1 |
| <i>ABCD4</i> | NM_005050.1 | Hs00245340_m1 |
| <br>         |             |               |
| <i>ABCE1</i> | NM_002940.2 | Hs01003010_g1 |
| <br>         |             |               |
| <i>ABCF1</i> | NM_001090.2 | Hs00153703_m1 |
| <i>ABCF2</i> | NM_007189.1 | Hs00606493_m1 |
| <i>ABCF3</i> | NM_018358.1 | Hs00217977_m1 |
| <br>         |             |               |
| <i>ABCG1</i> | NM_207174.1 | Hs00245154_m1 |
| <i>ABCG2</i> | NM_004827.2 | Hs00184979_m1 |
| <i>ABCG4</i> | NM_022169.3 | Hs00223446_m1 |
| <i>ABCG5</i> | NM_022436.2 | Hs00223686_m1 |
| <i>ABCG8</i> | NM_022437.2 | Hs00223690_m1 |

Uptake transporter

|                 |             |               |
|-----------------|-------------|---------------|
| <i>SLC1A4</i>   | NM_003038.2 | Hs00161719_m1 |
| <i>SLC1A5</i>   | NM_005628.1 | Hs00194540_m1 |
| <br>            |             |               |
| <i>SLC2A5</i>   | NM_003039.1 | Hs00161720_m1 |
| <br>            |             |               |
| <i>SLC3A1</i>   | NM_000341.2 | Hs00165789_m1 |
| <i>SLC3A2</i>   | NM_002394.4 | Hs00374243_m1 |
| <br>            |             |               |
| <i>SLC5A4</i>   | NM_014227.1 | Hs00429527_m1 |
| <i>SLC5A6</i>   | NM_021095.1 | Hs00221573_m1 |
| <br>            |             |               |
| <i>SLC7A1</i>   | NM_003045.3 | Hs00161807_m1 |
| <i>SLC7A2</i>   | NM_003046.3 | Hs00161809_m1 |
| <i>SLC7A3</i>   | NM_032803.4 | Hs00364157_m1 |
| <i>SLC7A5</i>   | NM_003486.5 | Hs00185826_m1 |
| <i>SLC7A8</i>   | NM_182728.1 | Hs00794796_m1 |
| <i>SLC7A9</i>   | NM_014270.3 | Hs00204638_m1 |
| <i>SLC7A10</i>  | NM_019849.1 | Hs00219811_m1 |
| <i>SLC7A11</i>  | NM_014331.3 | Hs00204928_m1 |
| <br>            |             |               |
| <i>SLC9A3R2</i> | NM_004785.3 | Hs00191186_m1 |
| <br>            |             |               |
| <i>SLC10A1</i>  | NM_003049.1 | Hs00161820_m1 |
| <br>            |             |               |
| <i>SLC15A1</i>  | NM_005073.1 | Hs00192639_m1 |
| <i>SLC15A2</i>  | NM_021082.2 | Hs00221539_m1 |

|                 |             |               |
|-----------------|-------------|---------------|
| <i>SLC16A2</i>  | NM_006517.2 | Hs00185140_m1 |
| <i>SLC16A3</i>  | NM_004207.2 | Hs00358829_m1 |
| <i>SLC19A1</i>  | NM_194255.1 | Hs00161870_m1 |
| <i>SLC19A2</i>  | NM_006996.1 | Hs00294767_m1 |
| <i>SLC19A3</i>  | NM_025243.3 | Hs00375596_m1 |
| <i>SLC22A1</i>  | NM_153187.1 | Hs00427550_m1 |
| <i>SLC22A2</i>  | NM_153191.1 | Hs00533907_m1 |
| <i>SLC25A5</i>  | NM_001152.1 | Hs00854499_g1 |
| <i>SLC25A15</i> | NM_014252.2 | Hs00274123_m1 |
| <i>SLC25A30</i> | AK094133.1  | Hs00416188_m1 |
| <i>SLC28A1</i>  | NM_004213.3 | Hs00188418_m1 |
| <i>SLC28A3</i>  | NM_022127.1 | Hs00223220_m1 |
| <i>SLC29A1</i>  | NM_004955.1 | Hs00191940_m1 |
| <i>SLC29A2</i>  | NM_001532.2 | Hs00155426_m1 |
| <i>SLC31A1</i>  | NM_001859.2 | Hs00977268_g1 |
| <i>SLC34A2</i>  | NM_006424.2 | Hs00197519_m1 |
| <i>SLCO1B3</i>  | NM_019844.2 | Hs00251986_m1 |
| <i>SLCO4A1</i>  | NM_016354.3 | Hs00249583_m1 |

Miscellaneous transporter

|                |             |               |
|----------------|-------------|---------------|
| <i>ATP8B1</i>  | NM_005603.3 | Hs00194444_m1 |
| <i>ATP7A</i>   | NM_000052.3 | Hs00163707_m1 |
| <i>ATP7B</i>   | NM_000053.2 | Hs00163739_m1 |
| <i>ATP6V0C</i> | NM_001694.2 | Hs00798308_sH |
| <i>ATP1A1</i>  | NM_000701.6 | Hs00167556_m1 |
| <i>ATP1B1</i>  | NM_001677.3 | Hs00426868_g1 |
| <i>ATP1G1</i>  | NM_001680.3 | Hs00242345_m1 |
| <i>KCNMA1</i>  | NM_002247.2 | Hs00266938_m1 |
| <i>APOE</i>    | NM_000041.2 | Hs00171168_m1 |
| <i>AQP7</i>    | NM_001170.1 | Hs00357359_m1 |
| <i>AQP9</i>    | NM_020980.2 | Hs00175573_m1 |

Cell adhesion

|              |             |               |
|--------------|-------------|---------------|
| <i>OCLN</i>  | NM_002538.2 | Hs00170162_m1 |
| <i>ANXA1</i> | NM_000700.1 | Hs00167549_m1 |
| <i>ANXA4</i> | NM_001153.2 | Hs00154040_m1 |

|               |             |               |
|---------------|-------------|---------------|
| <i>CLDN1</i>  | NM_021101.3 | Hs00221623_m1 |
| <i>CLDN16</i> | NM_006580.2 | Hs00198134_m1 |
| <i>CLDN2</i>  | NM_020384.2 | Hs00252666_s1 |
| <i>CLDN3</i>  | NM_001306.2 | Hs00265816_s1 |
| <i>CLDN4</i>  | NM_001305.3 | Hs00533616_s1 |
| <i>CLDN5</i>  | NM_003277.2 | Hs00533949_s1 |
| <i>CLDN7</i>  | NM_001307.3 | Hs00600772_m1 |
| <i>CFL1</i>   | NM_005507.2 | Hs00830568_g1 |
| <i>GJA1</i>   | NM_000165.2 | Hs00748445_s1 |
| <i>CDH1</i>   | NM_004360.2 | Hs00170423_m1 |
| <i>FN1</i>    | NM_212474.1 | Hs00365058_m1 |
| <i>ITGB1</i>  | NM_033666.1 | Hs00559595_m1 |

Signal transduction

|                |             |               |
|----------------|-------------|---------------|
| <i>MAP2K1</i>  | NM_002755.2 | Hs00605615_mH |
| <i>MAPK1</i>   | NM_138957.2 | Hs00177066_m1 |
| <i>MAPK3</i>   | NM_002746.2 | Hs00385075_m1 |
| <i>MAPK8</i>   | NM_139046.1 | Hs00177083_m1 |
| <i>WNT1</i>    | NM_005430.2 | Hs00180529_m1 |
| <i>BCR</i>     | NM_004327.3 | Hs00244716_m1 |
| <i>CTNNA1</i>  | NM_001903.2 | Hs00426996_m1 |
| <i>CTNNB1</i>  | NM_001904.2 | Hs00170025_m1 |
| <i>F3</i>      | NM_001993.2 | Hs00175225_m1 |
| <i>FZD1</i>    | NM_003505.1 | Hs00268943_s1 |
| <i>CHUK</i>    | NM_001278.3 | Hs00989502_m1 |
| <i>GPR177</i>  | NM_024911.4 | Hs00227727_m1 |
| <i>MTMR11</i>  | U78557.1    | Hs00198609_m1 |
| <i>OVCA2</i>   | NM_080822.2 | Hs00365563_g1 |
| <i>PDGFRB</i>  | NM_002609.3 | Hs00182163_m1 |
| <i>PIK3CA</i>  | NM_006218.2 | Hs00180679_m1 |
| <i>PTEN</i>    | NM_000314.4 | Hs00829813_s1 |
| <i>RHOD</i>    | NM_014578.2 | Hs00205854_m1 |
| <i>SFN</i>     | NM_006142.3 | Hs00602835_s1 |
| <i>TXNIP</i>   | NM_006472.1 | Hs00197750_m1 |
| <i>FKBP1A</i>  | NM_054014.1 | Hs00356621_g1 |
| <i>GBP1</i>    | NM_002053.1 | Hs00266717_m1 |
| <i>IGF1R</i>   | NM_000875.2 | Hs00181385_m1 |
| <i>INSR</i>    | NM_000208.1 | Hs00169631_m1 |
| <i>ITGAE</i>   | NM_002208.3 | Hs00559580_m1 |
| <i>NTRK2</i>   | NM_006180.3 | Hs00178811_m1 |
| <i>S100A10</i> | NM_002966.2 | Hs00237010_m1 |

Immune response

|            |             |               |
|------------|-------------|---------------|
| <i>CLU</i> | NM_203339.1 | Hs00156548_m1 |
|------------|-------------|---------------|

|             |             |               |
|-------------|-------------|---------------|
| <i>CCL2</i> | NM_002982.3 | Hs00234140_m1 |
| <i>IL6</i>  | NM_000600.1 | Hs00174131_m1 |

Metabolism: phase I reaction

|                              |             |               |
|------------------------------|-------------|---------------|
| <i>CYP1A2</i>                | NM_000761.3 | Hs00167927_m1 |
| <i>CYP2A13;CYP2A6;CYP2A7</i> | NM_000762.4 | Hs00711162_s1 |
| <i>CYP2B6</i>                | NM_000767.4 | Hs00167937_g1 |
| <i>CYP2C19;CYP2C8</i>        | NM_000770.3 | Hs00426387_m1 |
| <i>CYP2C8</i>                | M17398.1    | Hs00258314_m1 |
| <i>CYP2C9</i>                | NM_000771.2 | Hs00426397_m1 |
| <i>CYP2D6</i>                | NM_000106.4 | Hs00164385_m1 |
| <i>CYP2E1</i>                | NM_000773.3 | Hs00559368_m1 |
| <i>CYP3A4</i>                | NM_017460.3 | Hs00604506_m1 |
| <i>CYP3A5</i>                | NM_000777.2 | Hs00241417_m1 |
| <i>AHR</i>                   | NM_001621.3 | Hs00907314_m1 |
| <i>AKR1C1;AKR1C2</i>         | NM_001353.5 | Hs00413886_m1 |

Metabolism: phase II reaction

|              |             |               |
|--------------|-------------|---------------|
| <i>GPX1</i>  | NM_201397.1 | Hs00829989_gH |
| <i>GPX2</i>  | NM_002083.2 | Hs00702173_s1 |
| <i>GPX3</i>  | NM_002084.3 | Hs00173566_m1 |
| <i>GPX4</i>  | NM_002085.3 | Hs00157812_m1 |
| <i>GSK3B</i> | NM_002093.2 | Hs00275656_m1 |
| <i>GSR</i>   | NM_000637.2 | Hs00167317_m1 |
| <i>GSS</i>   | NM_000178.2 | Hs00609286_m1 |
| <i>GSTA1</i> | NM_145740.2 | Hs00275575_m1 |
| <i>GSTA2</i> | NM_000846.3 | Hs00747232_mH |
| <i>GSTA3</i> | NM_000847.3 | Hs00374175_m1 |
| <i>GSTA4</i> | NM_001512.2 | Hs00155308_m1 |
| <i>GSTA5</i> | NM_153699.1 | Hs00604085_m1 |
| <i>GSTK1</i> | NM_015917.1 | Hs00210861_m1 |
| <i>GSTM2</i> | NM_000848.2 | Hs00265266_g1 |
| <i>GSTM3</i> | NM_000849.3 | Hs00168307_m1 |
| <i>GSTM4</i> | NM_000850.3 | Hs00426432_m1 |
| <i>GSTM5</i> | NM_000851.2 | Hs00757076_m1 |
| <i>GSTO1</i> | NM_004832.1 | Hs00818731_m1 |
| <i>GSTP1</i> | NM_000852.2 | Hs00168310_m1 |
| <i>GSTT1</i> | NM_000853.1 | Hs00184475_m1 |
| <i>GSTT2</i> | NM_000854.2 | Hs00168315_m1 |
| <i>GSTZ1</i> | NM_145870.1 | Hs00155313_m1 |
| <i>GGT1</i>  | NM_005265.2 | Hs00359124_g1 |
| <i>GLO1</i>  | NM_006708.1 | Hs00198702_m1 |
| <i>HAGH</i>  | NM_005326.4 | Hs00193422_m1 |
| <i>ASAH1</i> | NM_177924.1 | Hs00602774_m1 |

|                                                                                                     |             |               |
|-----------------------------------------------------------------------------------------------------|-------------|---------------|
| <i>ASAH2</i>                                                                                        | NM_019893.1 | Hs00184096_m1 |
| <i>ASAH3</i>                                                                                        | NM_133492.1 | Hs00370322_m1 |
| <i>SGPP1</i>                                                                                        | NM_030791.2 | Hs00229266_m1 |
| <i>ATOX1</i>                                                                                        | NM_004045.3 | Hs00602773_m1 |
| <i>CCT8</i>                                                                                         | NM_006585.2 | Hs00607229_mH |
| <i>COX7A2</i>                                                                                       | NM_001865.2 | Hs01652418_m1 |
| <i>DHFR</i>                                                                                         | NM_000791.3 | Hs00758822_s1 |
| <i>GART</i>                                                                                         | NM_175085.1 | Hs00531926_m1 |
| <i>PDK1</i>                                                                                         | NM_002610.3 | Hs00176853_m1 |
| <i>PSMA3</i>                                                                                        | NM_152132.1 | Hs00541061_m1 |
| <i>STARD4</i>                                                                                       | NM_139164.1 | Hs00287823_m1 |
| <i>TXN</i>                                                                                          | X77584.1    | Hs00828652_m1 |
| <i>UGCG</i>                                                                                         | NM_003358.1 | Hs00234293_m1 |
| <i>UBL5</i>                                                                                         | NM_024292.3 | Hs00430663_g1 |
| <i>UGT1A8; UBT1A7;</i><br><i>UGT1A6; UGT1A5;</i><br><i>UGT1A9; UGT1A4;</i><br><i>UGT1A1; UGT1A3</i> | NM_019075.2 | Hs00166592_m1 |

#### Transcription factor

|               |             |               |
|---------------|-------------|---------------|
| <i>STAT1</i>  | NM_007315.2 | Hs00234829_m1 |
| <i>STAT3</i>  | NM_213662.1 | Hs00374280_m1 |
| <i>STAT5A</i> | NM_003152.2 | Hs00559643_m1 |
| <i>STAT5B</i> | NM_012448.3 | Hs00560035_m1 |
| <i>SP1</i>    | NM_138473.2 | Hs00412720_m1 |
| <i>TCEAL4</i> | BC012296.1  | Hs00227513_m1 |
| <i>E2F1</i>   | NM_005225.1 | Hs00153451_m1 |
| <i>NFKB1</i>  | NM_003998.2 | Hs00765730_m1 |
| <i>NFKBIA</i> | NM_020529.1 | Hs00153283_m1 |
| <i>NR1H2</i>  | NM_007121.3 | Hs00173195_m1 |
| <i>NR1H3</i>  | NM_005693.1 | Hs00172885_m1 |
| <i>NR1H4</i>  | NM_005123.1 | Hs00231968_m1 |
| <i>NR1I2</i>  | NM_033013.1 | Hs00243666_m1 |
| <i>NR1I3</i>  | NM_005122.2 | Hs00231959_m1 |
| <i>RXRβ</i>   | NM_021976.3 | Hs00232774_m1 |
| <i>HIF1A</i>  | NM_181054.1 | Hs00936368_m1 |
| <i>KLF1</i>   | NM_006563.2 | Hs00610592_m1 |

#### Translation

|               |             |               |
|---------------|-------------|---------------|
| <i>RPL13A</i> | NM_012423.2 | Hs01926559_g1 |
| <i>RPL36</i>  | NM_015414.3 | Hs00762481_s1 |
| <i>RPL41</i>  | NM_021104.1 | Hs00606029_g1 |
| <i>NOLA2</i>  | NM_017838.3 | Hs00750357_s1 |

Growth factor

|              |             |               |
|--------------|-------------|---------------|
| <i>VEGF</i>  | NM_003376.4 | Hs00900054_m1 |
| <i>TGFA</i>  | NM_003236.1 | Hs00177401_m1 |
| <i>TGFB1</i> | NM_000660.3 | Hs99999918_m1 |
| <i>EGFR</i>  | NM_005228.3 | Hs00193306_m1 |

Heat shock protein

|                 |             |                |
|-----------------|-------------|----------------|
| <i>HSF1</i>     | NM_005526.1 | Hs00232134_m1  |
| <i>HSP90AA1</i> | NM_005348.2 | Hs00743767_sH  |
| <i>HSPA5</i>    | NM_005347.2 | Hs999999174_m1 |
| <i>HSPB1</i>    | NM_001540.2 | Hs00356629_g1  |
| <i>HSPD1</i>    | NM_199440.1 | Hs01941522_u1  |
| <i>HSPE1</i>    | NM_002157.1 | Hs01654720_g1  |
| <i>HSPH1</i>    | NM_006644.2 | Hs00971475_m1  |

Extracellular matrix

|              |             |               |
|--------------|-------------|---------------|
| <i>MMP2</i>  | NM_004530.2 | Hs00234422_m1 |
| <i>MMP9</i>  | NM_004994.2 | Hs00234579_m1 |
| <i>TIMP1</i> | NM_003254.2 | Hs00171558_m1 |

Oncogene

|              |             |               |
|--------------|-------------|---------------|
| <i>ABL1</i>  | NM_005157.3 | Hs00245445_m1 |
| <i>AKT1</i>  | NM_005163.2 | Hs00178289_m1 |
| <i>JUN</i>   | NM_002228.3 | Hs00277190_s1 |
| <i>KIT</i>   | NM_000222.1 | Hs00174029_m1 |
| <i>NRAS</i>  | NM_002524.2 | Hs00180035_m1 |
| <i>RAF1</i>  | NM_002880.2 | Hs00234119_m1 |
| <i>MYC</i>   | NM_002467.3 | Hs00153408_m1 |
| <i>MDM2</i>  | NM_002392.2 | Hs00234753_m1 |
| <i>RELA</i>  | NM_021975.2 | Hs00153294_m1 |
| <i>FOS</i>   | NM_005252.2 | Hs00170630_m1 |
| <i>ERBB2</i> | NM_004448.2 | Hs00170433_m1 |
| <i>ETS1</i>  | NM_005238.2 | Hs00428287_m1 |
| <i>SRC</i>   | NM_198291.1 | Hs00178494_m1 |

Tumor suppressor

|                |             |               |
|----------------|-------------|---------------|
| <i>APC</i>     | NM_000038.3 | Hs00181051_m1 |
| <i>TP53</i>    | NM_000546.2 | Hs00153349_m1 |
| <i>TP53BP2</i> | NM_005426.2 | Hs00610488_m1 |
| <i>TP73</i>    | NM_005427.1 | Hs00232088_m1 |
| <i>RB1</i>     | NM_000321.2 | Hs00153108_m1 |

|              |             |               |
|--------------|-------------|---------------|
| <i>BRCA1</i> | NM_007294.2 | Hs00173237_m1 |
| <i>BRCA2</i> | NM_000059.2 | Hs00609060_m1 |
| <i>DAPK1</i> | NM_004938.2 | Hs00234489_m1 |

#### Cell cycle checkpoint

|              |             |               |
|--------------|-------------|---------------|
| <i>ATR</i>   | NM_001184.2 | Hs00169878_m1 |
| <i>ATM</i>   | NM_138292.3 | Hs00175892_m1 |
| <i>CHEK1</i> | NM_001274.2 | Hs00176236_m1 |
| <i>CHEK2</i> | NM_145862.2 | Hs00200485_m1 |
| <i>HUS1</i>  | NM_004507.2 | Hs00189595_m1 |
| <i>RAD1</i>  | NM_133377.2 | Hs00421891_g1 |
| <i>RAD17</i> | NM_133338.1 | Hs00607830_m1 |

#### Cell cycle

|               |             |               |
|---------------|-------------|---------------|
| <i>CCND1</i>  | NM_053056.2 | Hs00277039_m1 |
| <i>CDK4</i>   | NM_000075.2 | Hs00364847_m1 |
| <i>CDKN1A</i> | NM_078467.1 | Hs00355782_m1 |
| <i>CDKN1B</i> | NM_004064.2 | Hs00153277_m1 |
| <i>CDKN2A</i> | NM_058195.2 | Hs00233365_m1 |
| <i>AURKA</i>  | NM_003600.2 | Hs00269212_m1 |
| <i>CCNE1</i>  | NM_001238.1 | Hs00233356_m1 |
| <i>CCNH</i>   | NM_001239.2 | Hs00236923_m1 |
| <i>CDC40</i>  | NM_015891.2 | Hs00210705_m1 |
| <i>CDC42</i>  | NM_001791.3 | Hs00854939_g1 |
| <i>CDK2</i>   | NM_052827.1 | Hs00608082_m1 |
| <i>CDK7</i>   | NM_001799.2 | Hs00387062_m1 |
| <i>MKI67</i>  | NM_002417.3 | Hs00606991_m1 |
| <i>MNAT1</i>  | NM_002431.2 | Hs00159207_m1 |

#### Apoptosis

|                |             |               |
|----------------|-------------|---------------|
| <i>CIAPIN1</i> | NM_020313.2 | Hs00220419_m1 |
| <i>FADD</i>    | NM_003824.2 | Hs00538709_m1 |
| <i>FAS</i>     | NM_152871.1 | Hs00236330_m1 |
| <i>FASLG</i>   | NM_000639.1 | Hs00181225_m1 |
| <i>APAF1</i>   | NM_181861.1 | Hs00559441_m1 |
| <i>BAD</i>     | NM_032989.1 | Hs00188930_m1 |
| <i>BAX</i>     | NM_138761.2 | Hs00180269_m1 |
| <i>BCL2</i>    | NM_000633.2 | Hs00608023_m1 |
| <i>CASP3</i>   | NM_032991.2 | Hs00234387_m1 |
| <i>CASP8</i>   | NM_033355.2 | Hs01018151_m1 |
| <i>CASP9</i>   | NM_032996.1 | Hs00609640_m1 |
| <i>TRADD</i>   | NM_003789.3 | Hs00182558_m1 |
| <i>TNF</i>     | NM_000594.2 | Hs00174128_m1 |

|                  |             |               |
|------------------|-------------|---------------|
| <i>TNFRSF10A</i> | NM_003844.2 | Hs00269492_m1 |
| <i>TNFSF10</i>   | NM_003810.2 | Hs00234356_m1 |
| <i>TRAF1</i>     | NM_005658.3 | Hs00194639_m1 |
| <i>BAG1</i>      | NM_004323.3 | Hs00185390_m1 |
| <i>BAG3</i>      | NM_004281.3 | Hs00188713_m1 |
| <i>BAG4</i>      | NM_004874.2 | Hs00362193_m1 |
| <i>BID</i>       | NM_197966.1 | Hs00609632_m1 |
| <i>BCL2A1</i>    | NM_004049.2 | Hs00187845_m1 |
| <i>BCL2L1</i>    | NM_138578.1 | Hs00236329_m1 |
| <i>BIRC2</i>     | NM_001166.3 | Hs00357350_m1 |
| <i>BIRC3</i>     | NM_182962.1 | Hs00154109_m1 |
| <i>BIRC4</i>     | NM_001167.2 | Hs00236913_m1 |
| <i>BIRC5</i>     | NM_001168.2 | Hs00153353_m1 |
| <i>BIRC6</i>     | NM_016252.2 | Hs00212288_m1 |
| <i>BNIP3</i>     | NM_004052.2 | Hs00969291_m1 |
| <i>BNIP3L</i>    | NM_004331.2 | Hs00188949_m1 |
| <i>DIABLO</i>    | NM_138930.2 | Hs00219876_m1 |
| <i>MCL1</i>      | NM_021960.3 | Hs00172036_m1 |
| <i>BAK1</i>      | NM_001188.3 | Hs00832876_g1 |
| <i>CFLAR</i>     | NM_003879.3 | Hs00153439_m1 |
| <i>PDCD8</i>     | NM_145812.1 | Hs00377585_m1 |

Metallothionein

|             |             |               |
|-------------|-------------|---------------|
| <i>MT1A</i> | NM_005946.2 | Hs00831826_s1 |
| <i>MT1B</i> | NM_005947.1 | Hs00538861_m1 |
| <i>MT1F</i> | NM_005949.1 | Hs00744661_sH |
| <i>MT1H</i> | NM_005951.1 | Hs00823168_g1 |
| <i>MT1X</i> | NM_005952.2 | Hs00745167_sH |
| <i>MT2A</i> | NM_005953.2 | Hs02379661_g1 |
| <i>MT3</i>  | NM_005954.2 | Hs00359394_g1 |
| <i>MT4</i>  | NM_032935.2 | Hs00262914_m1 |

Cisplatin resistance

|                |             |               |
|----------------|-------------|---------------|
| <i>CLPTM1L</i> | NM_030782.2 | Hs00363947_m1 |
| <i>CROP</i>    | NM_006107.2 | Hs00212659_m1 |

Multidrug resistance protein

|            |             |               |
|------------|-------------|---------------|
| <i>MVP</i> | NM_017458.2 | Hs00245438_m1 |
|------------|-------------|---------------|

Nucleotide-excision repair

|              |             |               |
|--------------|-------------|---------------|
| <i>ERCC1</i> | NM_001983.2 | Hs00157415_m1 |
| <i>ERCC2</i> | NM_000400.2 | Hs00361161_m1 |

|               |             |               |
|---------------|-------------|---------------|
| <i>ERCC3</i>  | NM_000122.1 | Hs00164475_m1 |
| <i>ERCC4</i>  | NM_005236.1 | Hs00193342_m1 |
| <i>ERCC5</i>  | NM_000123.2 | Hs00164482_m1 |
| <i>ERCC6</i>  | NM_000124.1 | Hs00164491_m1 |
| <i>ERCC8</i>  | NM_000082.2 | Hs00163958_m1 |
| <i>RAD23A</i> | NM_005053.2 | Hs00192541_m1 |
| <i>RAD23B</i> | NM_002874.3 | Hs00234102_m1 |
| <i>XPA</i>    | NM_000380.2 | Hs00166045_m1 |
| <i>XPC</i>    | NM_004628.3 | Hs00190295_m1 |

#### Base-excision repair

|              |             |               |
|--------------|-------------|---------------|
| <i>MBD4</i>  | NM_003925.1 | Hs00187498_m1 |
| <i>APEX1</i> | NM_080648.1 | Hs00172396_m1 |
| <i>APEX2</i> | NM_014481.2 | Hs00205565_m1 |
| <i>PARP2</i> | NM_005484.3 | Hs00193931_m1 |
| <i>POLB</i>  | NM_002690.1 | Hs00160263_m1 |
| <i>MUTYH</i> | NM_012222.2 | Hs00276113_m1 |
| <i>OGG1</i>  | NM_016819.2 | Hs00213454_m1 |

#### Mismatch excision repair

|             |             |               |
|-------------|-------------|---------------|
| <i>MLH1</i> | NM_000249.2 | Hs00179866_m1 |
| <i>MLH3</i> | NM_014381.2 | Hs00271778_m1 |
| <i>MSH2</i> | NM_000251.1 | Hs00179887_m1 |
| <i>MSH3</i> | NM_002439.2 | Hs00267239_m1 |
| <i>MSH6</i> | NM_000179.1 | Hs00264721_m1 |

#### Double-strand break repair

|               |             |               |
|---------------|-------------|---------------|
| <i>MRE11A</i> | NM_005590.3 | Hs00271551_m1 |
| <i>RAD50</i>  | NM_133482.1 | Hs00194871_m1 |
| <i>XRCC1</i>  | NM_006297.1 | Hs00959834_m1 |
| <i>XRCC2</i>  | NM_005431.1 | Hs00538799_m1 |
| <i>XRCC3</i>  | NM_005432.2 | Hs00193725_m1 |
| <i>XRCC4</i>  | NM_022406.1 | Hs00243327_m1 |
| <i>XRCC5</i>  | NM_021141.2 | Hs00221707_m1 |
| <i>XRCC6</i>  | NM_001469.3 | Hs01922652_g1 |

#### Protein repair

|              |             |               |
|--------------|-------------|---------------|
| <i>SEPX1</i> | NM_016332.2 | Hs00249482_m1 |
|--------------|-------------|---------------|

#### Miscellaneous DNA repair

|              |             |               |
|--------------|-------------|---------------|
| <i>PARP1</i> | NM_001618.2 | Hs00242302_m1 |
|--------------|-------------|---------------|

|              |             |               |
|--------------|-------------|---------------|
| <i>TOP1</i>  | NM_003286.2 | Hs00243257_m1 |
| <i>TOP2A</i> | NM_001067.2 | Hs00172214_m1 |
| <i>TOP2B</i> | NM_001068.2 | Hs00172259_m1 |
| <i>RAD18</i> | NM_020165.2 | Hs00220119_m1 |
| <i>RAD51</i> | NM_133487.1 | Hs00153418_m1 |
| <i>LIG4</i>  | NM_206937.1 | Hs00172455_m1 |
| <i>MGMT</i>  | NM_002412.2 | Hs00172470_m1 |
| <i>POLH</i>  | NM_006502.1 | Hs00197814_m1 |
| <i>POLI</i>  | NM_007195.1 | Hs00200488_m1 |
| <i>POLK</i>  | NM_016218.1 | Hs00211963_m1 |

Housekeeping gene

|             |             |               |
|-------------|-------------|---------------|
| <i>18S</i>  | NR_003286   | Hs99999901_s1 |
| <i>ACTB</i> | NM_001101.2 | Hs99999903_m1 |

Function unknown

|                         |             |               |
|-------------------------|-------------|---------------|
| <i>C8orf33</i>          | NM_023080.1 | Hs00535769_m1 |
| <i>EHBP1</i>            | NM_015252.2 | Hs00324154_m1 |
| <i>LAMP1</i>            | NM_005561.3 | Hs00174766_m1 |
| <i>LAMP2</i>            | NM_013995.1 | Hs00174474_m1 |
| <i>TMEM109; MGC5508</i> | NM_024092.1 | Hs00225418_m1 |
| <i>TPRKB</i>            | NM_016058.1 | Hs00274981_m1 |
| <i>UNQ501;MGC3205</i>   | NM_198536.1 | Hs00414441_m1 |
| <i>UQCRQ</i>            | NM_014402.4 | Hs00429571_g1 |
| <i>SIRT1</i>            | NM_012238.3 | Hs00202021_m1 |
| <i>SIRT2</i>            | NM_030593.1 | Hs00247263_m1 |
| <i>SIRT3</i>            | NM_012239.4 | Hs00202030_m1 |
| <i>SIRT4</i>            | NM_012240.1 | Hs00202033_m1 |
| <i>SIRT5</i>            | NM_012241.2 | Hs00202043_m1 |
| <i>SIRT6</i>            | NM_016539.1 | Hs00213036_m1 |
| <i>SIRT7</i>            | NM_016538.1 | Hs00213029_m1 |
| <i>LBR</i>              | NM_194442.1 | Hs00172444_m1 |

---

\* Gillet J-P, Gottesman MM, Calcagno AM, Ambudkar SV, Varma S, Rueda BR, Sood A, Ganapathi R, Seiden M, and Davidson B. Methods for prediction of clinical outcome to treatment of ovarian cancer patients. U.S. Provisional Patent Application No. 61/308,946, filed February 27, 2010. ABC = ATP-binding cassette
