# Supplementary material
Source: PubMed Central journal article supplement (PMC2970576)
Supplement: supp_djq361_jnci-JNCI-09-1342-s10.pdf [file supp_djq361_jnci-JNCI-09-1342-s10.pdf]

**Supplementary Table 7.** Genes whose expression in CD44+/CD24– MCF-7/ADR cells compared with CD44+/CD24+ MCF-7/ADR cells was statistically significantly different, with a fold change of greater than 2\*

| <b>Gene symbol</b> | <b>Gene name</b>                                    | <b>Location</b> | <b>Type(s)</b>                    | <b>Fold change</b> |
|--------------------|-----------------------------------------------------|-----------------|-----------------------------------|--------------------|
| <i>ABCA1</i>       | ATP-binding cassette, subfamily A (ABC1), member 1  | Plasma membrane | Transporter                       | 5.386              |
| <i>ABCA13</i>      | ATP-binding cassette, subfamily A (ABC1), member 13 | Unknown         | Transporter                       | -2.957             |
| <i>ABCA5</i>       | ATP-binding cassette, subfamily A (ABC1), member 5  | Plasma membrane | Transporter                       | -2.274             |
| <i>ABCD2</i>       | ATP-binding cassette, subfamily D (ALD), member 2   | Cytoplasm       | Transporter                       | -3.018             |
| <i>ACER1</i>       | Alkaline ceramidase 1                               | Cytoplasm       | Enzyme                            | -2.642             |
| <i>AHR</i>         | Aryl hydrocarbon receptor                           | Nucleus         | Ligand-dependent nuclear receptor | -3.006             |
| <i>ANXA1</i>       | Annexin A1                                          | Plasma membrane | Other                             | -2.419             |
| <i>APEX1</i>       | APEX nuclease (multifunctional DNA repair enzyme) 1 | Nucleus         | Enzyme                            | -2.689             |
| <i>ATOX1</i>       | ATX1 antioxidant protein 1 homolog (yeast)          | Cytoplasm       | Transporter                       | -2.973             |
| <i>BAG1</i>        | BCL2-associated athanogene                          | Cytoplasm       | Other                             | -3.071             |
| <i>BCL2L1</i>      | BCL2-like 1                                         | Cytoplasm       | Other                             | -2.228             |
| <i>BIRC5</i>       | Baculoviral IAP repeat-containing 5                 | Cytoplasm       | Other                             | -2.236             |
| <i>CCNE1</i>       | Cyclin E1                                           | Nucleus         | Transcription regulator           | 2.19               |
| <i>CDKN1A</i>      | Cyclin-dependent kinase inhibitor 1A (p21, Cip1)    | Nucleus         | Other                             | 2.338              |
| <i>CFLAR</i>       | CASP8 and FADD-like apoptosis regulator             | Cytoplasm       | Other                             | -2.007             |
| <i>CIAPIN1</i>     | Cytokine induced apoptosis inhibitor 1              | Cytoplasm       | Other                             | 2.811              |
| <i>CLDN3</i>       | Claudin 3                                           | Plasma membrane | Transmembrane receptor            | 2.555              |
| <i>CLDN5</i>       | Claudin 5                                           | Plasma membrane | Other                             | 1.997              |
| <i>CLPTM1L</i>     | CLPTM1-like                                         | Unknown         | Other                             | -2.227             |

|                                     |                                                                                        |                     |                         |        |
|-------------------------------------|----------------------------------------------------------------------------------------|---------------------|-------------------------|--------|
| <i>DOT1L</i>                        | DOT1-like, histone H3 methyltransferase ( <i>Saccharomyces cerevisiae</i> )            | Nucleus             | Phosphatase             | 2.797  |
| <i>FAS</i>                          | Fas (TNF receptor superfamily, member 6)                                               | Plasma membrane     | Transmembrane receptor  | 2.476  |
| <i>GGT1</i>                         | $\gamma$ -Glutamyltransferase 1                                                        | Cytoplasm           | Enzyme                  | 2.965  |
| <i>GSTM2</i>                        | Glutathione S-transferase $\mu$ 2 (muscle)                                             | Cytoplasm           | Enzyme                  | 4.358  |
| <i>GSTM4</i>                        | Glutathione S-transferase $\mu$ 4                                                      | Cytoplasm           | Enzyme                  | 4.407  |
| <i>GSTO1</i>                        | Glutathione S-transferase $\omega$ 1                                                   | Cytoplasm           | Enzyme                  | 2.239  |
| <i>HSF1</i>                         | Heat shock transcription factor 1                                                      | Nucleus             | Transcription regulator | -2.051 |
| <i>HSPB1</i>                        | Heat shock 27kda protein 1                                                             | Cytoplasm           | Other                   | 2.055  |
| <i>HSPH1</i>                        | Heat shock 105kda/110kda protein 1                                                     | Cytoplasm           | Other                   | -2.507 |
| <i>IL6</i>                          | Interleukin 6 (interferon, $\beta$ 2)                                                  | Extracellular space | Cytokine                | -2.351 |
| <i>JUN</i>                          | Jun oncogene                                                                           | Nucleus             | Transcription regulator | 2.175  |
| <i>KCNMA1</i>                       | Potassium large conductance calcium-activated channel, subfamily M, $\alpha$ member 1  | Plasma membrane     | Ion channel             | 3.231  |
| <i>LBR</i>                          | Lamin B receptor                                                                       | Nucleus             | Enzyme                  | -2.744 |
| <i>MDM2</i>                         | Mdm2 p53 binding protein homolog (mouse)                                               | Nucleus             | Transcription regulator | -4.209 |
| <i>MLH3</i>                         | MutL homolog 3 ( <i>Escherichia coli</i> )                                             | Nucleus             | Other                   | 2.218  |
| <i>MMP9</i>                         | Matrix metalloproteinase 9 (gelatinase B, 92kda gelatinase, 92kda type IV collagenase) | Extracellular space | Peptidase               | 3.064  |
| <i>MT2A</i>                         | Metallothionein 2A                                                                     | Cytoplasm           | Other                   | -2.327 |
| <i>POLB</i>                         | Polymerase (DNA directed), $\beta$                                                     | Nucleus             | Enzyme                  | -2.373 |
| <i>RAD23A</i>                       | RAD23 homolog A ( <i>S. cerevisiae</i> )                                               | Nucleus             | Other                   | -2.051 |
| <i>RAD51</i>                        | RAD51 homolog (reca homolog, <i>E. coli</i> ) ( <i>S. cerevisiae</i> )                 | Nucleus             | Enzyme                  | -3.171 |
| <i>RPL36</i><br>(includes EG:25873) | Ribosomal protein L36                                                                  | Cytoplasm           | Other                   | -2.647 |

|                                      |                                                                                                                                                          |                 |                         |        |
|--------------------------------------|----------------------------------------------------------------------------------------------------------------------------------------------------------|-----------------|-------------------------|--------|
| <i>SIRT2</i>                         | Sirtuin (silent mating type information regulation 2 homolog) 2 ( <i>S. cerevisiae</i> )                                                                 | Nucleus         | Transcription regulator | 1.981  |
| <i>SIRT3</i>                         | Sirtuin (silent mating type information regulation 2 homolog) 3 ( <i>S. cerevisiae</i> )                                                                 | Cytoplasm       | Enzyme                  | 2.008  |
| <i>SIRT4</i>                         | Sirtuin (silent mating type information regulation 2 homolog) 4 ( <i>S. cerevisiae</i> )                                                                 | Cytoplasm       | Enzyme                  | -2.881 |
| <i>SLC16A2</i>                       | Solute carrier family 16, member 2 (monocarboxylic acid transporter 8)                                                                                   | Plasma membrane | Transporter             | -3.999 |
| <i>SLC19A3</i>                       | Solute carrier family 19, member 3                                                                                                                       | Plasma membrane | Transporter             | 2.659  |
| <i>SLC22A1</i>                       | Solute carrier family 22 (organic cation transporter), member 1                                                                                          | Plasma membrane | Transporter             | -2.826 |
| <i>SLC22A4</i><br>(includes EG:6583) | Solute carrier family 22 (organic cation/ergothioneine transporter), member 4                                                                            | Plasma membrane | Transporter             | 2.621  |
| <i>SLC25A15</i>                      | Solute carrier family 25 (mitochondrial carrier; ornithine transporter) member 15                                                                        | Cytoplasm       | Transporter             | 2.437  |
| <i>SLC29A1</i>                       | Solute carrier family 29 (nucleoside transporters), member 1                                                                                             | Plasma membrane | Transporter             | 2.127  |
| <i>SLC3A1</i>                        | Solute carrier family 3 (cystine, dibasic and neutral amino acid transporters, activator of cystine, dibasic and neutral amino acid transport), member 1 | Plasma membrane | Transporter             | 4.425  |
| <i>SLC7A10</i>                       | Solute carrier family 7, (neutral amino acid transporter, y <sup>+</sup> system) member 10                                                               | Plasma membrane | Transporter             | -2.025 |
| <i>SLC7A11</i>                       | Solute carrier family 7, (cationic amino acid transporter, y <sup>+</sup> system) member 11                                                              | Plasma membrane | Transporter             | 2.264  |
| <i>SLCO4A1</i>                       | Solute carrier organic anion transporter family, member 4A1                                                                                              | Plasma membrane | Transporter             | 2.54   |
| <i>SRC</i>                           | V-src sarcoma (Schmidt-Ruppin A-2) viral oncogene homolog (avian)                                                                                        | Cytoplasm       | Kinase                  | -2.028 |
| <i>STARD4</i>                        | Star-related lipid transfer (START) domain containing 4                                                                                                  | Cytoplasm       | Transporter             | 2.098  |

|               |                                                                        |                     |             |        |
|---------------|------------------------------------------------------------------------|---------------------|-------------|--------|
| <i>TAP1</i>   | Transporter 1, ATP-binding cassette, sub-family B (MDR/TAP)            | Cytoplasm           | Transporter | -2.026 |
| <i>TCEAL4</i> | Transcription elongation factor A (SII)-like 4                         | Unknown             | Other       | -2.536 |
| <i>TNF</i>    | Tumor necrosis factor (TNF superfamily, member 2)                      | Extracellular space | Cytokine    | 2.149  |
| <i>TPRKB</i>  | TP53RK binding protein                                                 | Unknown             | Other       | -3.287 |
| <i>TRAF1</i>  | TNF receptor-associated factor 1                                       | Cytoplasm           | Other       | 2.343  |
| <i>UBL5</i>   | Ubiquitin-like 5                                                       | Cytoplasm           | Other       | -2.528 |
| <i>UGCG</i>   | UDP-glucose ceramide glucosyltransferase                               | Cytoplasm           | Enzyme      | 2.407  |
| <i>XRCC4</i>  | X-ray repair complementing defective repair in Chinese hamster cells 4 | Nucleus             | Other       | 2.308  |

\*APEX = Apurinic-apyrimidinic endonuclease; ATX1 = antioxidant protein; BCL2 = B-cell CLL/lymphoma; IAP = Inhibitor of apoptosis protein; CASP8 = apoptosis-related cysteine peptidase; FADD = FAS-associated death domain protein; CLPTM1 = cleft lip and palate associated transmembrane protein; DOT1 = disruptor of telomeric silencing; TNF = Tumor necrosis factor; Mdm2 = mouse double minute 2; MutL = *E. coli* DNA mismatch repair gene; START = Star-related lipid transfer domain; MDR/TAP = Multidrug resistant/ transporter associated with antigen processing; TP53RK = TP53 regulating kinase.
