# Supplementary material
Source: PubMed Central journal article supplement (PMC2970576)
Supplement: supp_djq361_jnci-JNCI-09-1342-s11.pdf [file supp_djq361_jnci-JNCI-09-1342-s11.pdf]

**Supplementary Table 4.** Oligonucleotide primer sequences used for microarray validation

| Gene symbol     | Position of primer | Forward oligonucleotide sequence | Reverse oligonucleotide sequence |
|-----------------|--------------------|----------------------------------|----------------------------------|
| <i>ABCB1</i>    | 834-1086           | GCCTGGCAGCTGGAAGACAAATAC         | ATGGCCAAAATCACAAGGGTTAGC         |
| <i>ABCB4</i>    | 3624-3795          | CATTGTGATAGCACACCGACTGTCTAC      | TTCTTCTGACTGGATCTGGCTTCCTG       |
| <i>CDH1</i>     | 2001-2163          | TCACAGCAGAACTAACACACGGG          | GTGGTCACTTGGTCTTTATTCTGGTTATCC   |
| <i>CDH2</i>     | 1331-1540          | AATGACAATCCTCCAGAGTTTACTGCC      | GGTGACTAACCCGTCGTTGCT            |
| <i>CXCL12</i>   | 163-314            | GCCTGAGCTACAGATGCCCA             | CTTCGGGTCAATGCACACTTGTC          |
| <i>EMP1</i>     | 248-412            | GGTCCACATCGCTACTGTTATTATGCTAT    | TGCACTGTCTTGAGGGCATCTTC          |
| <i>ESR1</i>     | 1082-1235          | CCGGCTCCGCAAATGCTAC              | AAGGTTGGCAGCTCTCATGTC            |
| <i>NRCAM</i>    | 992-1150           | CAGAATATTGTGAATGCCACCGCC         | GGAACTATCGTCGCTGAAGATGTACT       |
| <i>SERPINE2</i> | 408-575            | GACGGCAGGACCAAGAAGCA             | AGGCACTTCAATTCAGAGGCAT           |
| <i>VIM</i>      | 1326-1484          | GGAAGCTGCTGGAAGGCGA              | CCTGTCCATCTCTAGTTTCAACCGTCTTA    |
| <i>PMCA4</i>    | 2309-2465          | ATCTGCATAGCTTACCGGGACT           | TGCCAGCTTGTTTGCATTTGGCAATA       |
